# Supplementary material
Source: MDPI journal article supplement (https://www.mdpi.com/2077-1312/12/2/220)
Supplement: s1 [file s1]

## Supplementary Material S1

Characteristic examples of solid boundary classification on the ports' waterfronts for the determination of partial/full wave reflection regimes in Model B's domains.

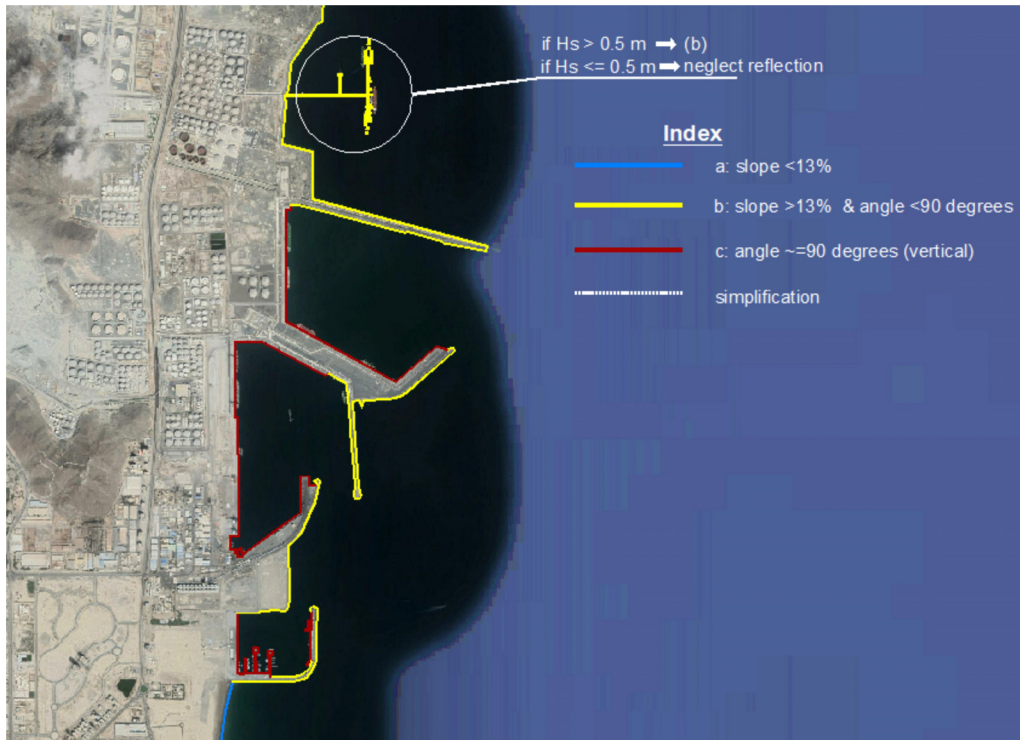

Figure S1.1 Port of Fujairah

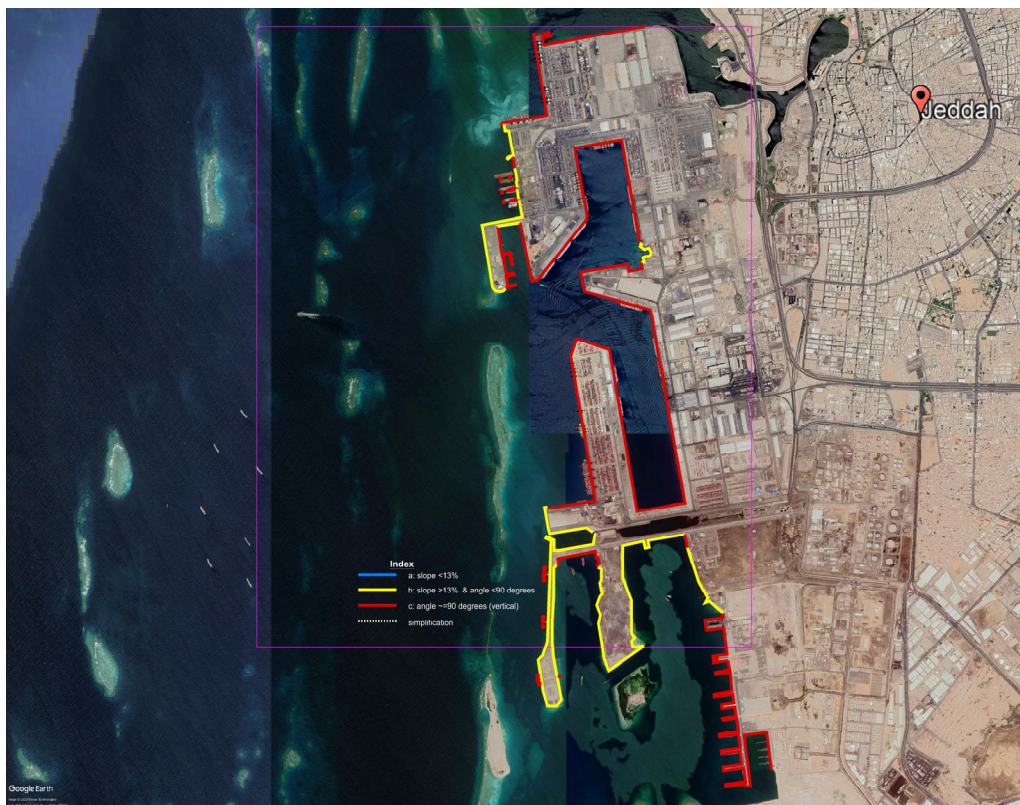

Figure S1.2 Port of Jeddah



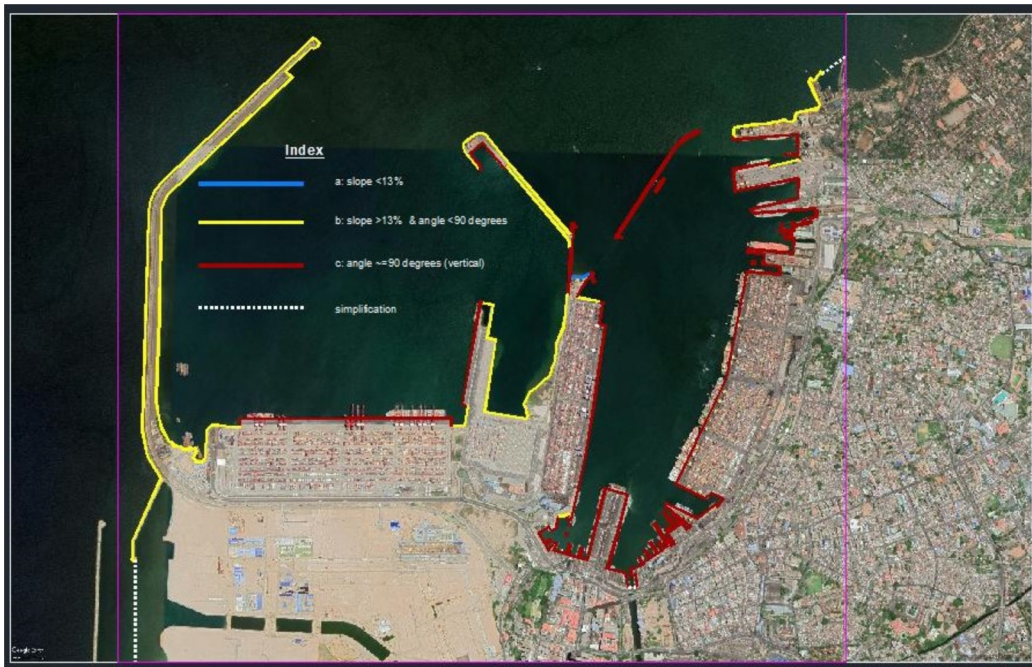

Figure S1.3 Port of Colombo

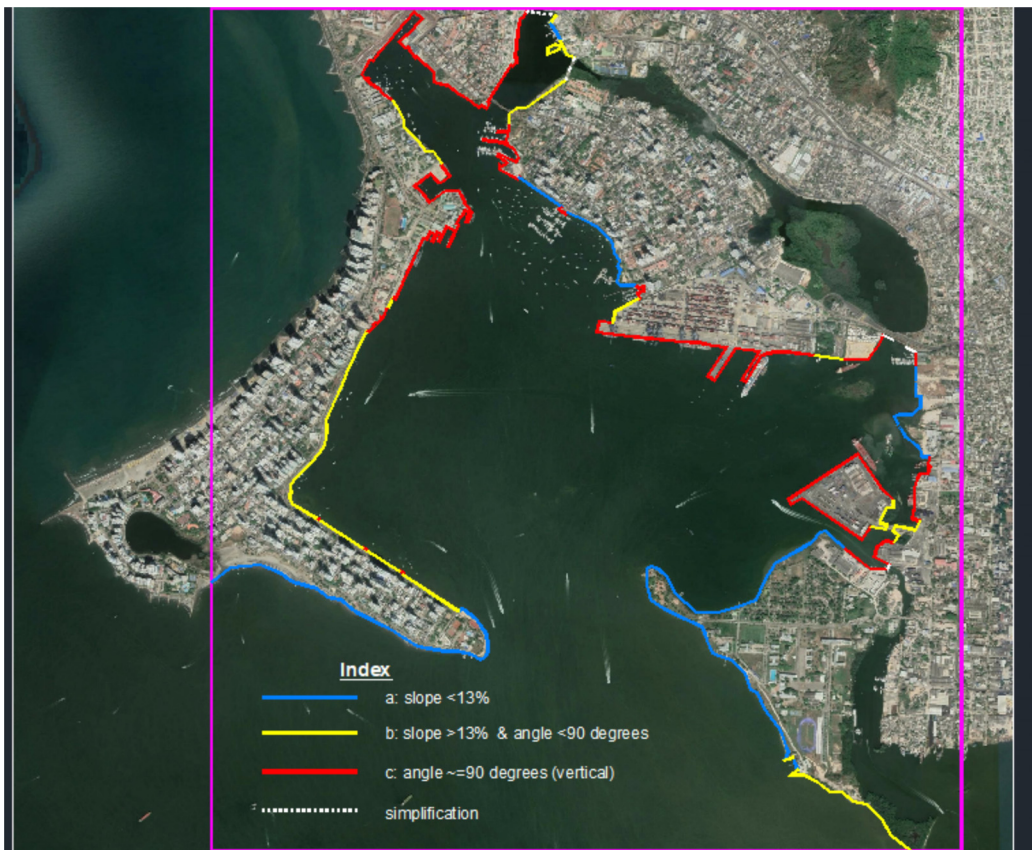

Figure S1.4 Port of Cartagena



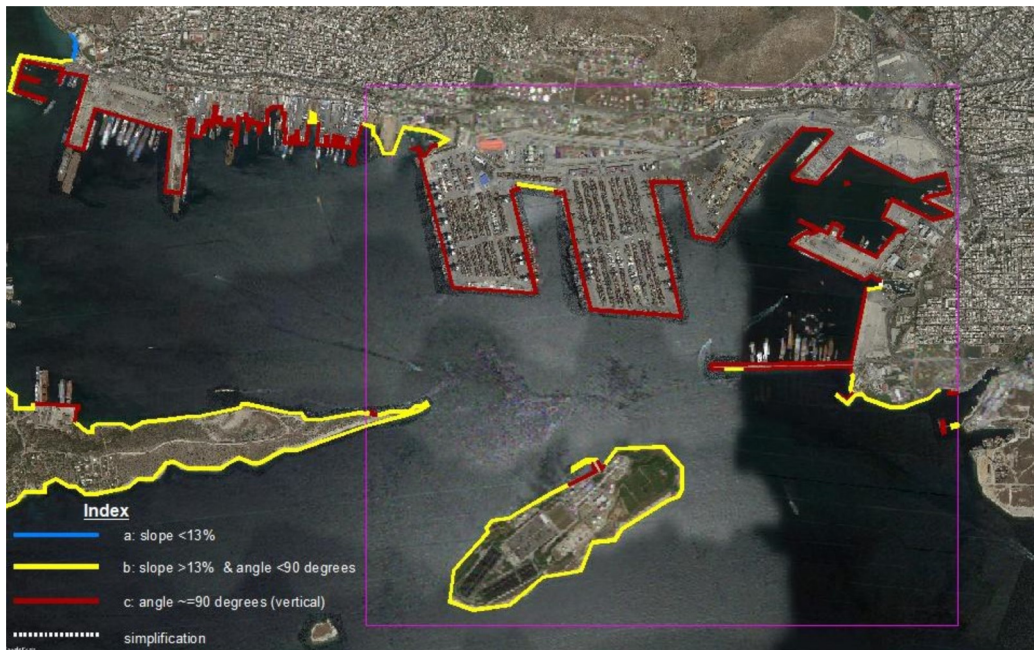

Figure S1.5 Port of Piraeus

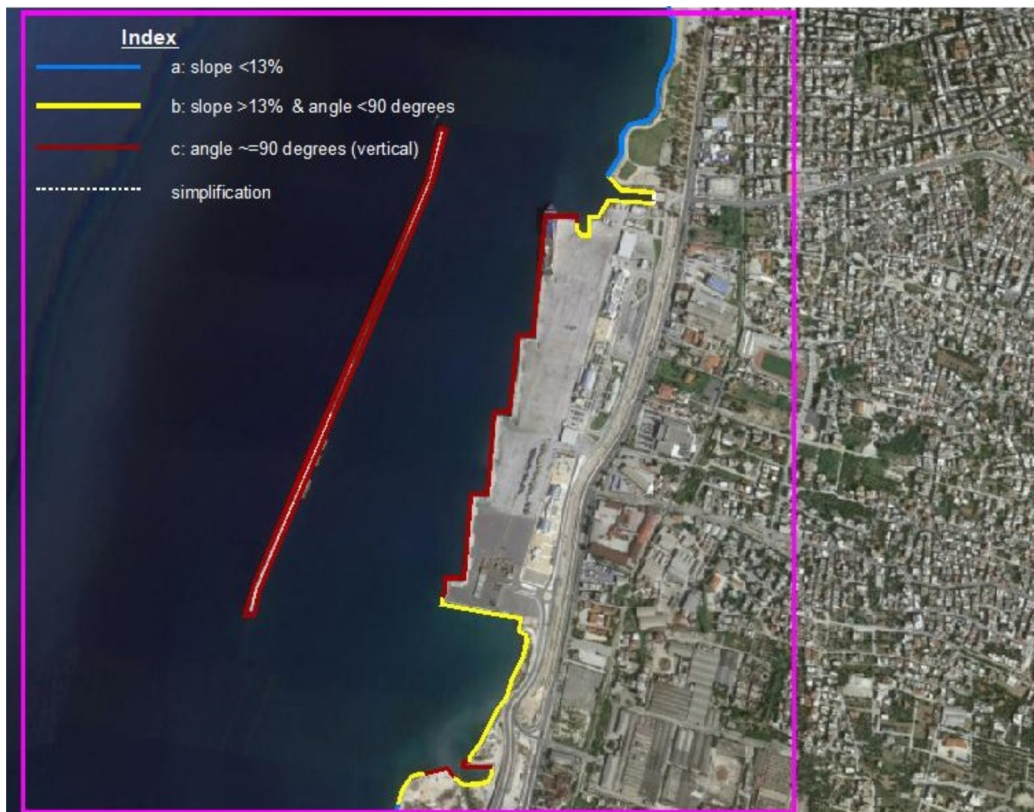

Figure S1.6 Port of Patra



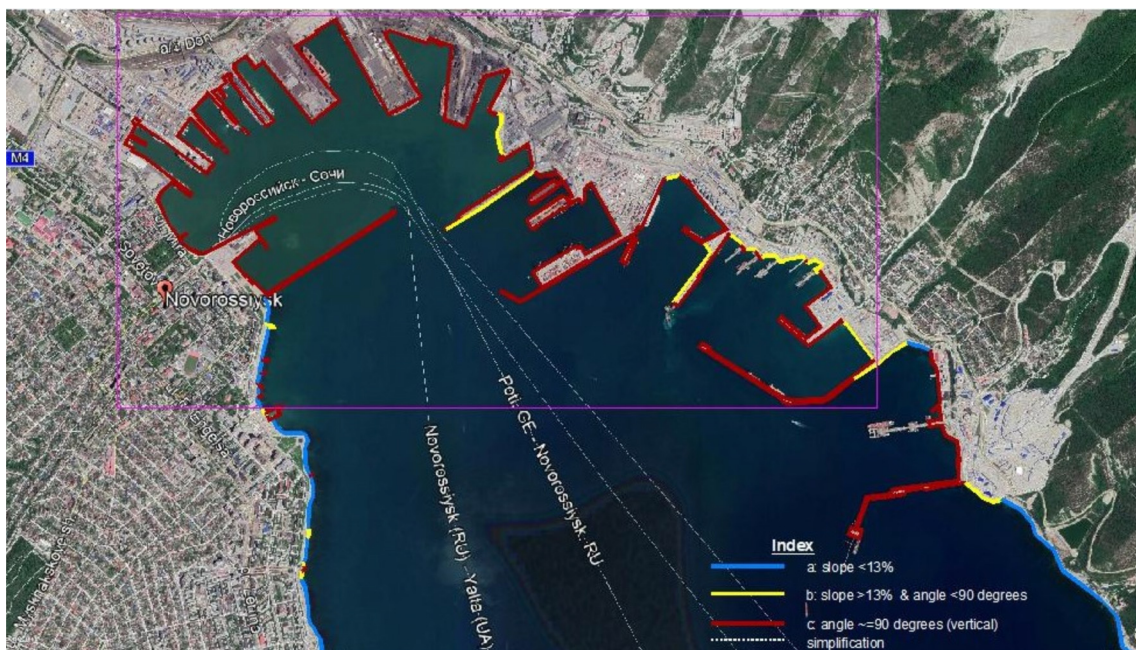

Figure S1.7 Port of Novorossiysk

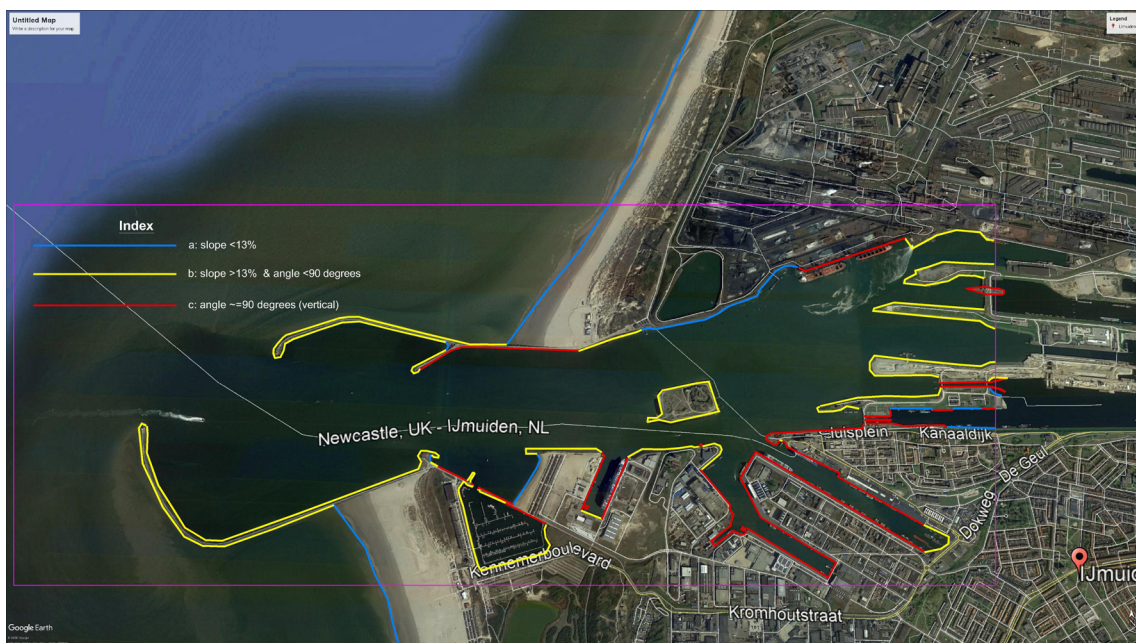

Figure S1.8 Port of IJmuiden



## Supplementary Material S2

Characteristic details and depiction of the Accu-Waves OFP schematics of WFS model execution *in tandem* with patrimonial (external) and produced (internal) data flow.

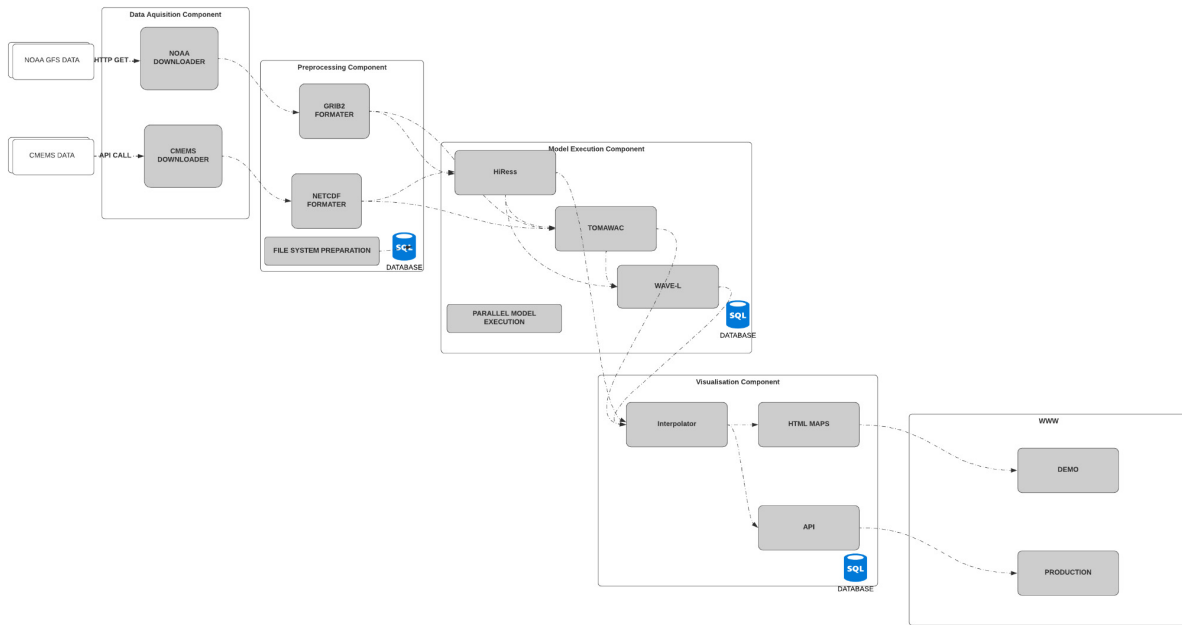

Figure S2.1. Detailed depiction of Accu-Waves system architecture.

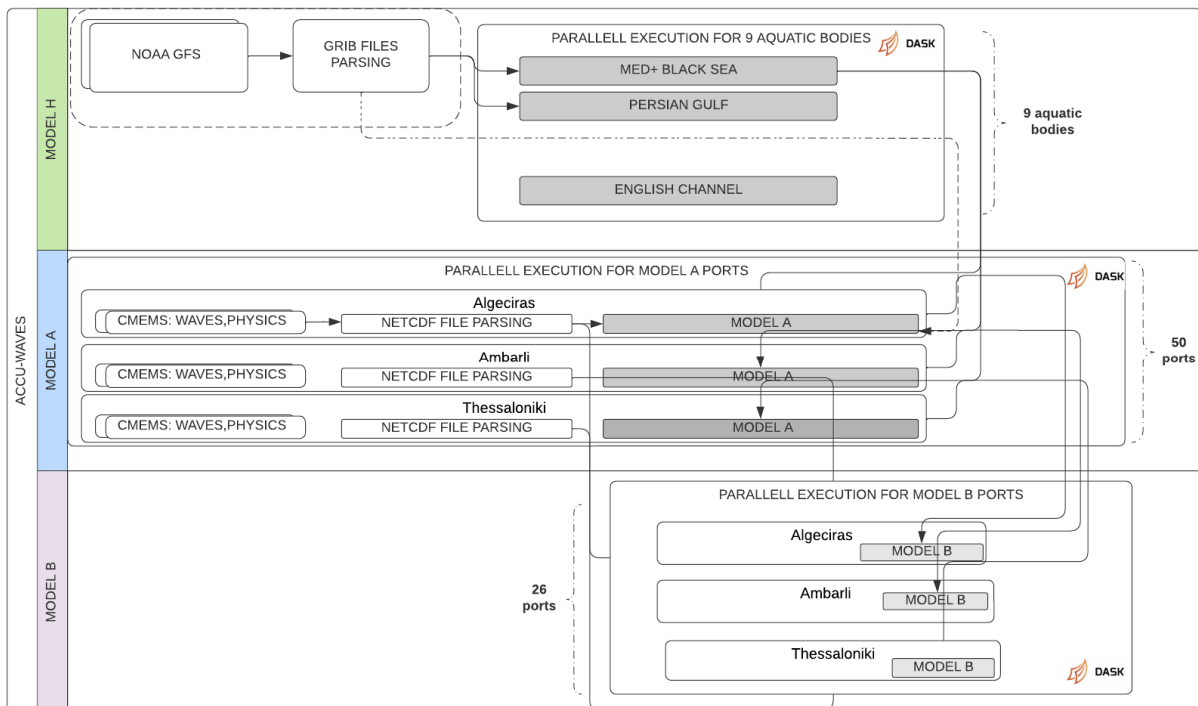

Figure S2.2 Schematics of the parallelization procedure of the Accu-Waves OFP computational tasks and codes' execution, and the WFS model runs.



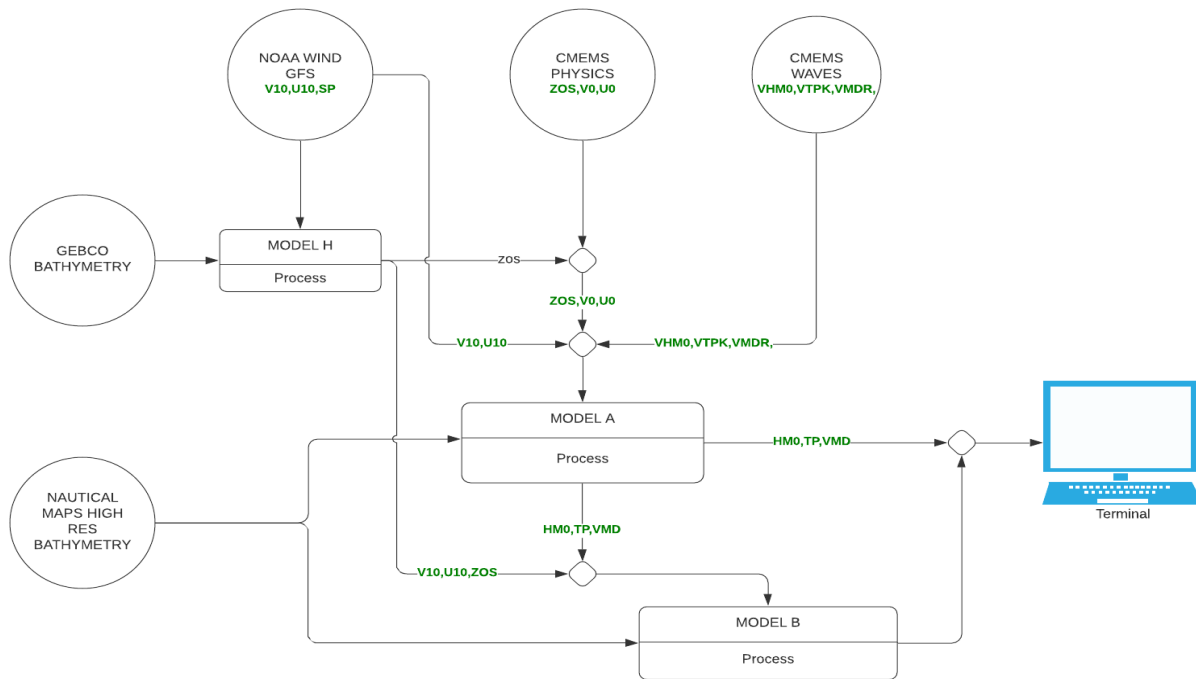

Figure S2.3. Schematics of model Accu-Waves OFP integration execution course and interaction of WFS model results. Parameters as written in the data-exchange *Python* coding system include: Significant Wave Height by CMEMS and Model A, VHMO and HMO, respectively; Peak Spectral Wave Period by CMEMS and Model A, VTPK and TP, respectively; Mean Wave Propagation Direction by CMEMS and Model A, VMDR and VMD, respectively; Meridional and Zonal Barotropic Current Speed components by either Model H or CMEMS, VO and UO; Mean Sea Level Elevation due to meteorological forcing and astronomical tides by either Model H or CMEMS, ZOS; Meridional and Zonal Wind Speed components by NOAA, V10 and U10. NOAA and CMEMS forecasts' data are provided freely for research purposes.



### Supplementary Material S3

Figures of characteristic results by simulations with Model A in 49 globally significant ports are provided. All simulations refer to moderate, rough, and very rough wave conditions and highly detailed depictions of the wave-induced agitation in the areas surrounding the ports (Model A).

| Scenarios | $H_s$ (m) | $T_p$ (s) | $\phi_i$ (°) | Wind Speed  |             |
|-----------|-----------|-----------|--------------|-------------|-------------|
|           |           |           |              | $W_x$ (m/s) | $W_y$ (m/s) |
| A#1       | 2.5       | 6.75      | 135          | 8.49        | -8.49       |
| A#2       | 5.5       | 11.0      | 135          | 17.68       | -17.68      |

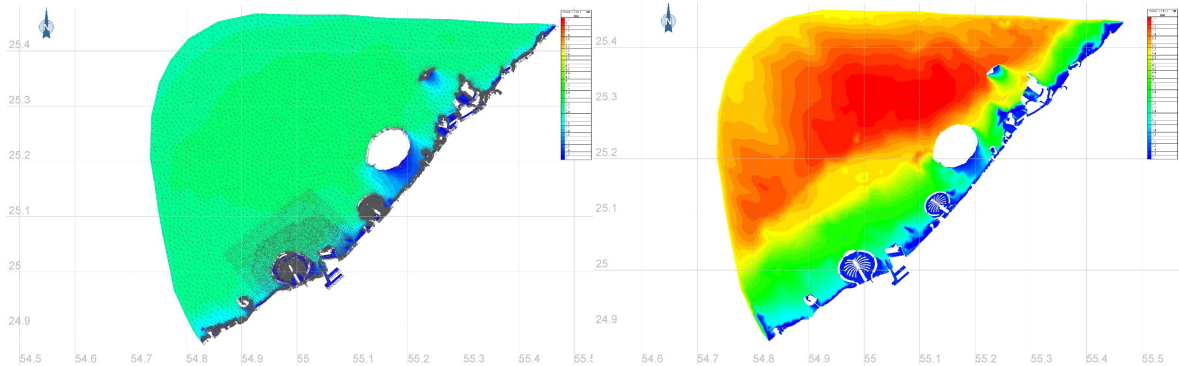

Figure S3.1. Characteristic operational WFS results of  $H_{mo}$  (m) by Model A in **Jebel Ali** (UAE, Persian Gulf; no. 2 of Table 1) port during W-NW sector moderate and very rough wave conditions, respectively. Scenarios A#1 (left) and A#2 (right).

| Scenarios | $H_s$ (m) | $T_p$ (s) | $\phi_i$ (°) | Wind Speed  |             |
|-----------|-----------|-----------|--------------|-------------|-------------|
|           |           |           |              | $W_x$ (m/s) | $W_y$ (m/s) |
| A#1       | 1.80      | 4.5       | 225          | -7.07       | -7.07       |
| A#2       | 3.80      | 10        | 225          | -14.14      | -14.14      |

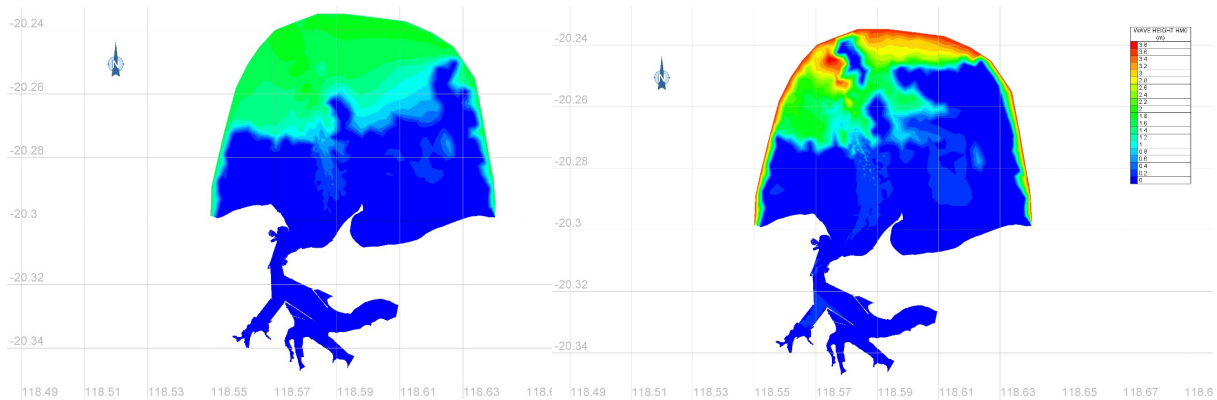

Figure S3.2. Characteristic operational WFS results of  $H_{mo}$  (m) by Model A in **Port Hedland** (Australia, Indian Ocean; no. 4 of Table 1) port during N-NE sector moderate and rough wave conditions, respectively. Scenarios A#1 (left) and A#2 (right).

| Scenarios | $H_s$ (m) | $T_p$ (s) | $\phi_i$ (°) | Wind Speed |
|-----------|-----------|-----------|--------------|------------|
|-----------|-----------|-----------|--------------|------------|

|            |      |     |     | $W_x$ (m/s) | $W_y$ (m/s) |
|------------|------|-----|-----|-------------|-------------|
| <b>A#1</b> | 3.80 | 10  | 120 | 12.99       | -7.5        |
| <b>A#2</b> | 1.80 | 4.5 | 90  | 10          | 0           |

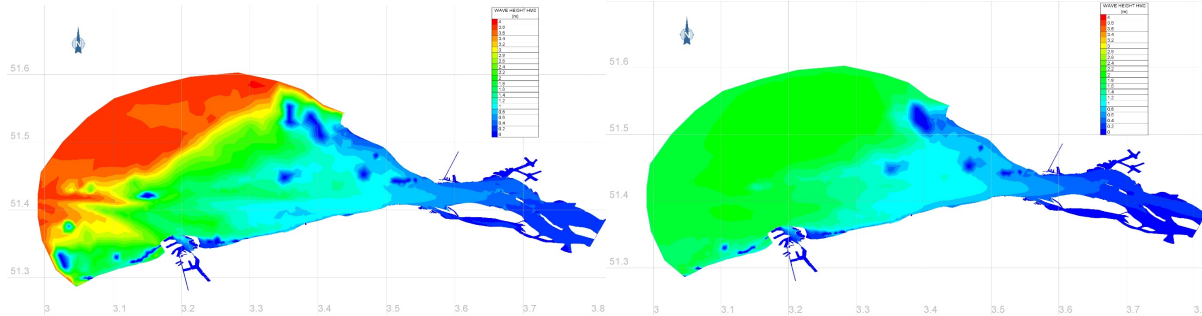

Figure S3.3. Characteristic operational WFS results of  $H_{mo}$  (m) by Model A in **Antwerp** (Belgium, North Sea; no. 5 of Table 1) port during W-NW and W sectors rough and moderate wave conditions, respectively. Scenarios A#1 (left) and A#2 (right).

| Scenarios  | $H_s$ (m) | $T_p$ (s) | $\phi_i$ (°) | Wind Speed  |             |
|------------|-----------|-----------|--------------|-------------|-------------|
|            |           |           |              | $W_x$ (m/s) | $W_y$ (m/s) |
| <b>A#1</b> | 2.5       | 6.75      | 315          | -8.48       | 8.48        |
| <b>A#2</b> | 5.5       | 11.0      | 315          | -17.68      | 17.68       |

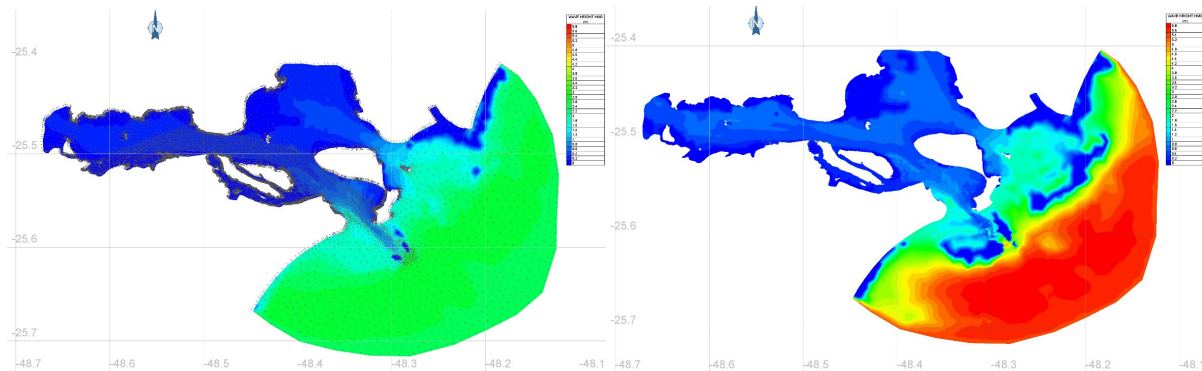

Figure S3.4. Characteristic operational WFS results of  $H_{mo}$  (m) by Model A in **Paranagua** (Brazil, Southwestern Atlantic Ocean; no. 6 of Table 1) port during SE sector moderate and very rough wave conditions, respectively. Scenarios A#1 (left) and A#2 (right).

| Scenarios | $H_s$ (m) | $T_p$ (s) | $\phi_i$ (°) | Wind Speed  |             |
|-----------|-----------|-----------|--------------|-------------|-------------|
|           |           |           |              | $W_x$ (m/s) | $W_y$ (m/s) |



|            |     |      |     |       |      |
|------------|-----|------|-----|-------|------|
| <b>A#1</b> | 2.5 | 6.75 | 315 | -8.48 | 8.48 |
| <b>A#2</b> | 5.5 | 11   | 315 | -8.48 | 8.48 |

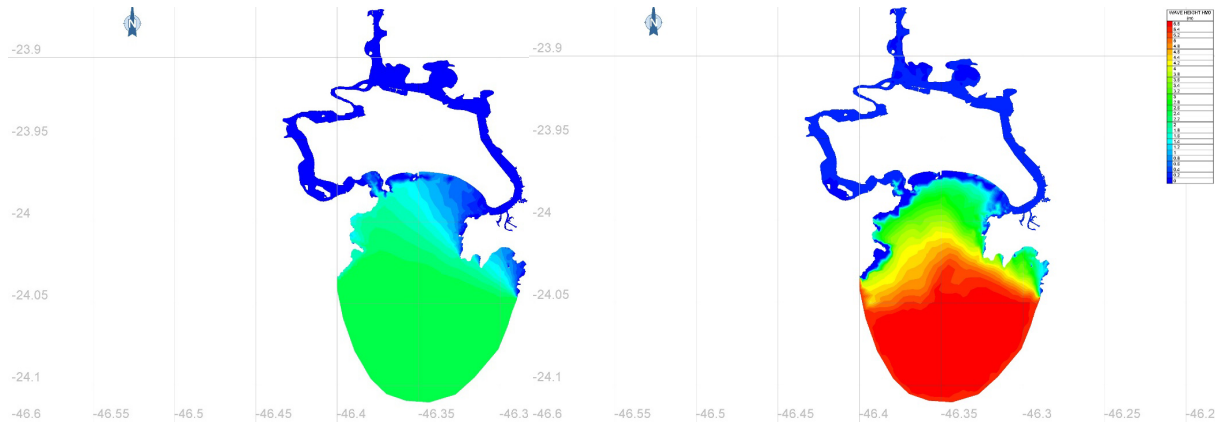

Figure S3.5. Characteristic operational WFS results of  $H_{mo}$  (m) by Model A in **Santos** (Brazil, Southwestern Atlantic Ocean; no. 7 of Table 1) port during SE sector moderate and very rough wave conditions, respectively. Scenarios A#1 (left) and A#2 (right).

| Scenarios  | $H_s$ (m) | $T_p$ (s) | $\phi_i$ (°) | Wind Speed  |             | SLE (m) |
|------------|-----------|-----------|--------------|-------------|-------------|---------|
|            |           |           |              | $W_x$ (m/s) | $W_y$ (m/s) |         |
| <b>A#1</b> | 2.5       | 6.75      | 135          | 8.49        | -8.49       | 0       |
| <b>A#2</b> | 5.5       | 11.0      | 135          | 17.68       | -17.68      | 3.5     |

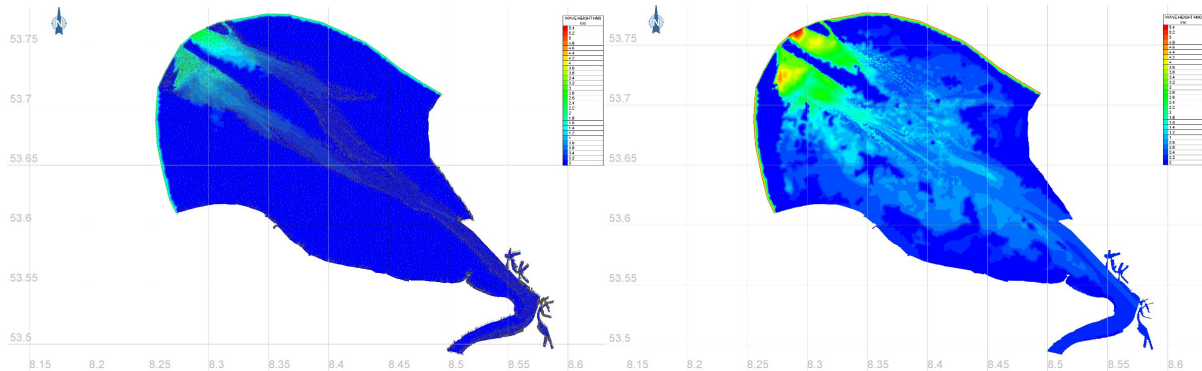

Figure S3.6. Characteristic operational WFS results of  $H_{mo}$  (m) by Model A in **Bremerhaven** (Germany, North Sea; no. 10 of Table 1) port during NW sector moderate and very rough wave conditions, respectively. Scenarios A#1 (left) and A#2 (right).

| Scenarios  | $H_s$ (m) | $T_p$ (s) | $\phi_i$ (°) | Wind Speed  |             | SLE (m) |
|------------|-----------|-----------|--------------|-------------|-------------|---------|
|            |           |           |              | $W_x$ (m/s) | $W_y$ (m/s) |         |
| <b>A#1</b> | 1.8       | 4.5       | 135          | 7.07        | -7.07       | +0      |

|            |     |    |     |       |        |      |
|------------|-----|----|-----|-------|--------|------|
| <b>A#2</b> | 3.8 | 10 | 135 | 14.14 | -14.14 | +3.5 |
|------------|-----|----|-----|-------|--------|------|

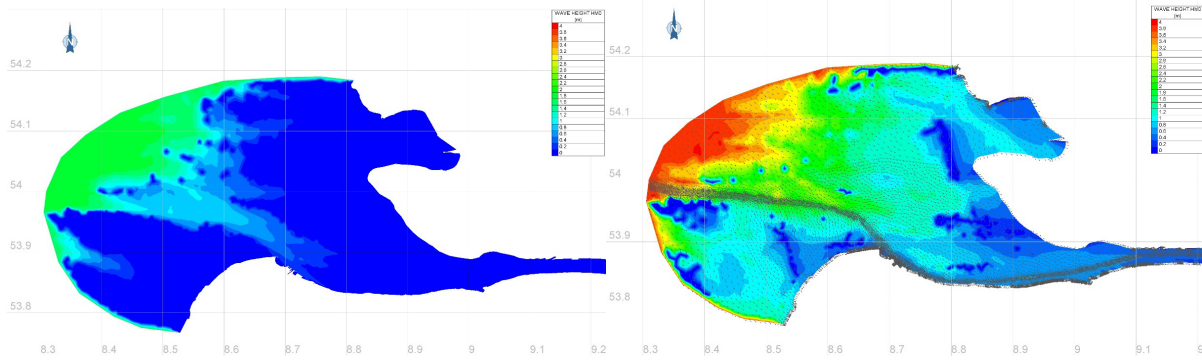

Figure S3.7. Characteristic operational WFS results of  $H_{mo}$  (m) by Model A in **Hamburg** (Germany, North Sea; no. 11 of Table 1) port during NW sector moderate and rough wave conditions, respectively. Scenarios A#1 (left) and A#2 (right).

| Scenarios  | $H_s$ (m) | $T_p$ (s) | $\phi_i$ (°) | Wind Speed  |             |
|------------|-----------|-----------|--------------|-------------|-------------|
|            |           |           |              | $W_x$ (m/s) | $W_y$ (m/s) |
| <b>A#1</b> | 1.80      | 4.5       | 225          | -7.07       | -7.07       |
| <b>A#2</b> | 3.80      | 10        | 270          | -15         | 0           |

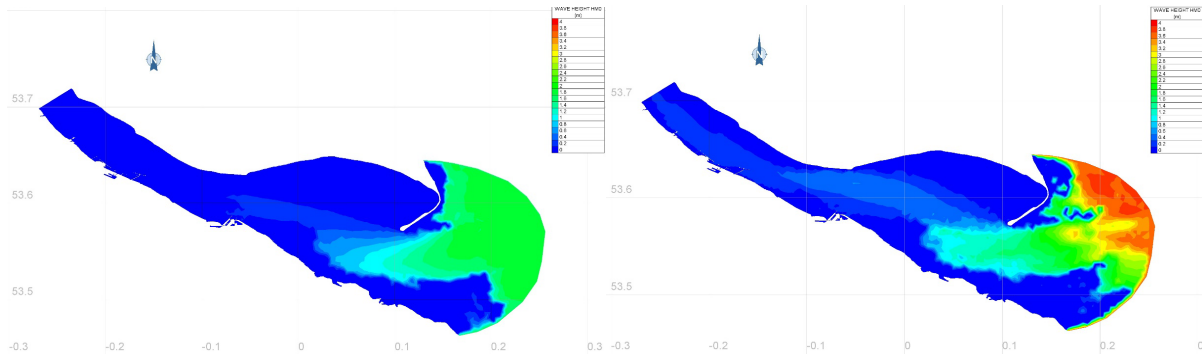

Figure S3.8. Characteristic operational WFS results of  $H_{mo}$  (m) by Model A in **Immingham** (UK, North Sea; no. 15 of Table 1) port during NE and E sectors moderate and rough wave conditions, respectively. Scenarios A#1 (left) and A#2 (right).

| Scenarios  | $H_s$ (m) | $T_p$ (s) | $\phi_i$ (°) | Wind Speed  |             |
|------------|-----------|-----------|--------------|-------------|-------------|
|            |           |           |              | $W_x$ (m/s) | $W_y$ (m/s) |
| <b>A#1</b> | 5.5       | 11        | 315          | -17.68      | 17.68       |
| <b>A#2</b> | 2.5       | 6.75      | 45           | 8.49        | 8.49        |



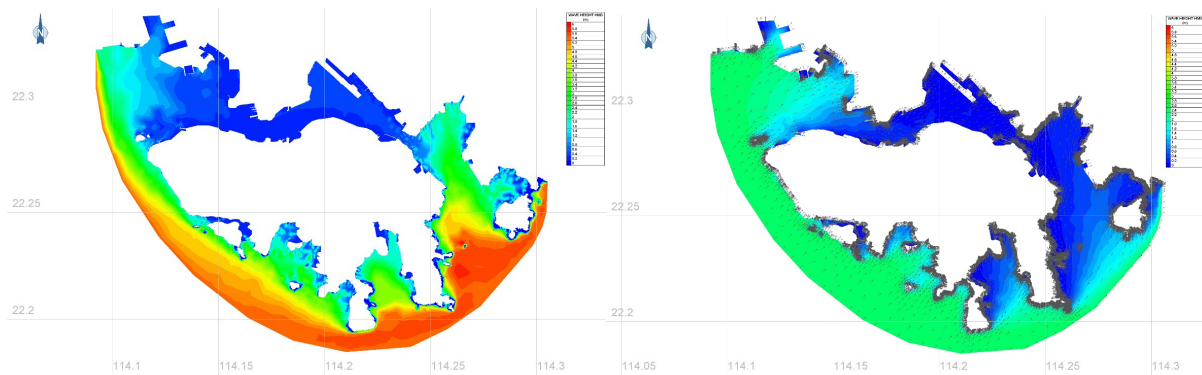

Figure S3.9. Characteristic operational WFS results of  $H_{mo}$  (m) by Model A in **Hong Kong** (China, Yellow Sea, West Pacific Ocean; no. 19 of Table 1) port during SE and SW sectors very rough and moderate wave conditions, respectively. Scenarios A#1 (left) and A#2 (right).

| Scenarios  | $H_s$ (m) | $T_p$ (s) | $\phi_i$ (°) | Wind Speed  |             |
|------------|-----------|-----------|--------------|-------------|-------------|
|            |           |           |              | $W_x$ (m/s) | $W_y$ (m/s) |
| <b>A#1</b> | 3.80      | 10        | 120          | 7.5         | -13         |
| <b>A#2</b> | 3.80      | 10        | 180          | 0           | -15         |

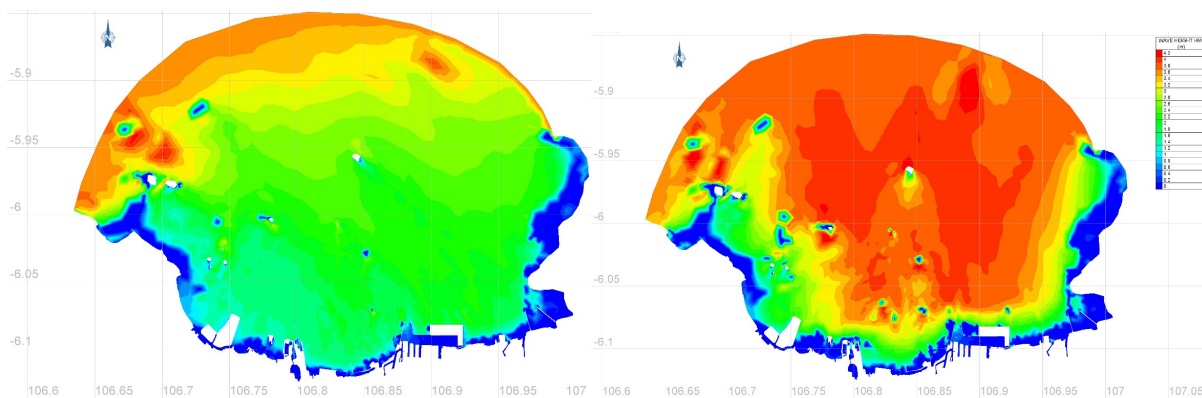

Figure S3.10. Characteristic operational WFS results of  $H_{mo}$  (m) by Model A in **Jakarta** (Indonesia, Java Sea; no. 20 of Table 1) port during NW and N sectors rough wave conditions, respectively. Scenarios A#1 (left) and A#2 (right).

| Scenarios  | $H_s$ (m) | $T_p$ (s) | $\phi_i$ (°) | Wind Speed  |             |
|------------|-----------|-----------|--------------|-------------|-------------|
|            |           |           |              | $W_x$ (m/s) | $W_y$ (m/s) |
| <b>A#1</b> | 2.5       | 6.75      | 45           | 10.6        | 10.6        |
| <b>A#2</b> | 5.5       | 11.0      | 45           | 17.67       | 17.67       |

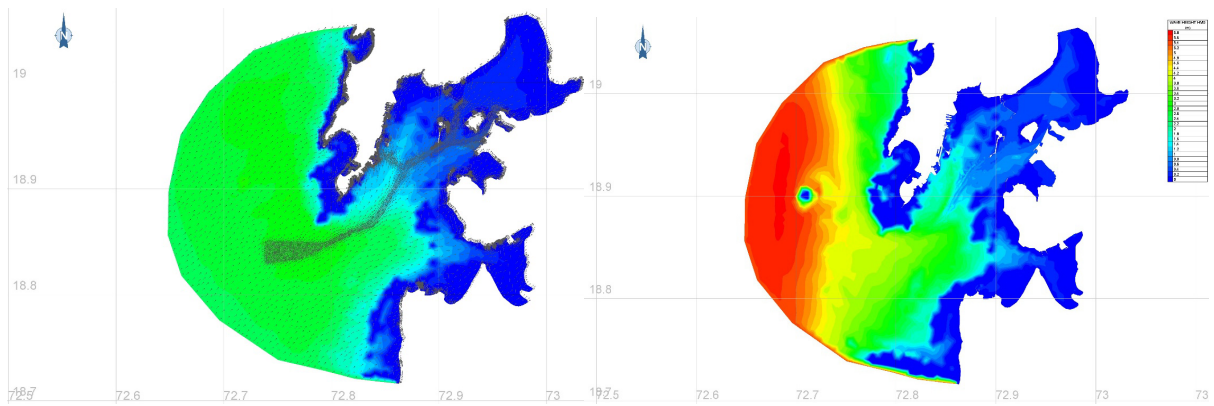

Figure S3.11. Characteristic operational WFS results of  $H_{mo}$  (m) by Model A in **Mumbai** (India, Arabian Sea; no. 23 of Table 1) port during SW sector moderate and very rough wave conditions. Scenarios A#1 (left) and A#2 (right).

| Scenarios  | $H_s$ (m) | $T_p$ (s) | $\phi_i$ (°) | Wind Speed  |             |
|------------|-----------|-----------|--------------|-------------|-------------|
|            |           |           |              | $W_x$ (m/s) | $W_y$ (m/s) |
| <b>A#1</b> | 2.5       | 6.75      | 75           | 14.48       | 3.88        |
| <b>A#2</b> | 5.5       | 11        | 75           | 24.14       | 6.47        |

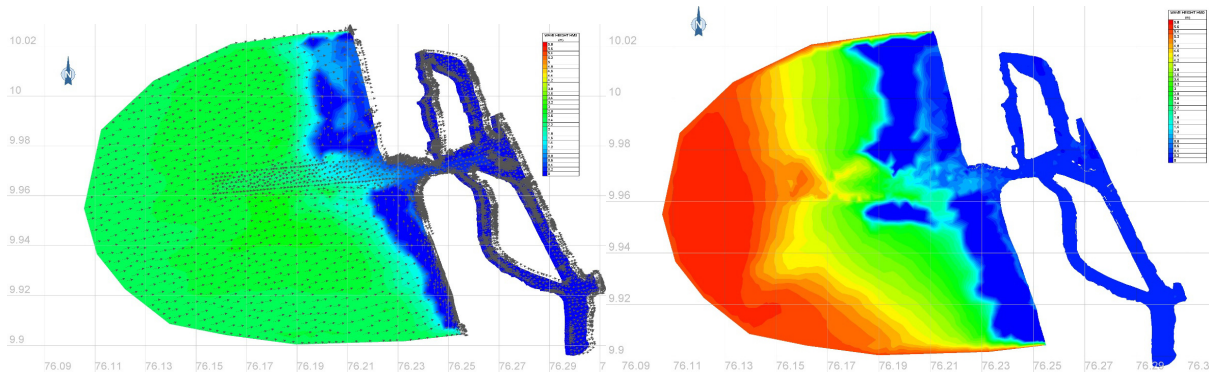

Figure S3.12. Characteristic operational WFS results of  $H_{mo}$  (m) by Model A in **Cochin** (India, Arabian Sea – Laccadive Sea – Indian Ocean sea-route; no. 24 of Table 1) port during W-SW sector moderate and very rough wave conditions. Scenarios A#1 (left) and A#2 (right).

| Scenarios  | $H_s$ (m) | $T_p$ (s) | $\phi_i$ (°) | Wind Speed  |             |
|------------|-----------|-----------|--------------|-------------|-------------|
|            |           |           |              | $W_x$ (m/s) | $W_y$ (m/s) |
| <b>A#1</b> | 2.5       | 6.75      | 20           | 4.10        | 11.27       |
| <b>A#2</b> | 5.5       | 11        | 20           | 8.55        | 23.49       |



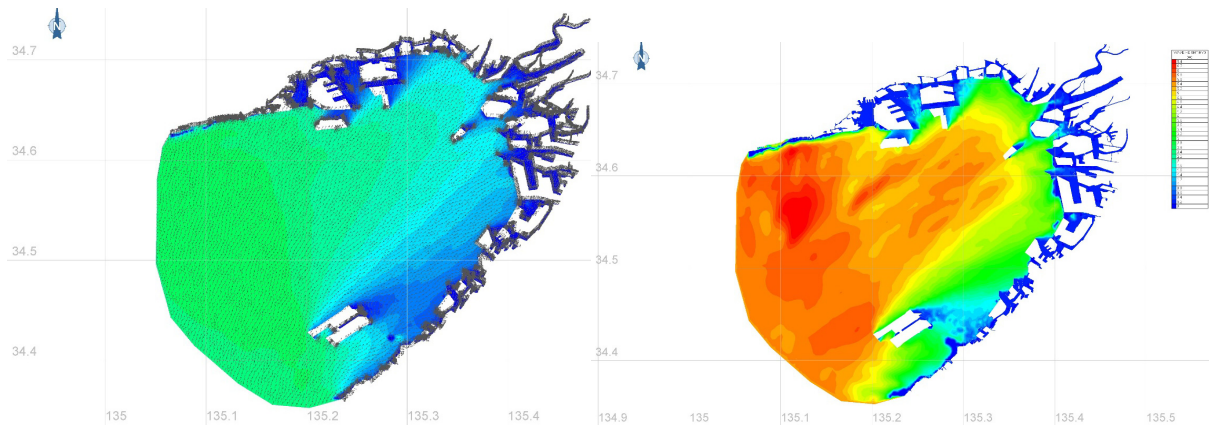

Figure S3.13. Characteristic operational WFS results of  $H_{mo}$  (m) by Model A in **Osaka** and **Kobe** (Japan, West Pacific Ocean; no. 26 & 28 of Table 1) ports during S-SW sector moderate and very rough wave conditions. Scenarios A#1 (left) and A#2 (right).

| Scenarios | $H_s$ (m) | $T_p$ (s) | $\phi_i$ (°) | Wind Speed  |             |
|-----------|-----------|-----------|--------------|-------------|-------------|
|           |           |           |              | $W_x$ (m/s) | $W_y$ (m/s) |
| A#1       | 3.1       | 4.5       | 40           | 3.5         | 12.0        |
| A#2       | 0.0       | 0.0       | 0            | 16.5        | 19.1        |

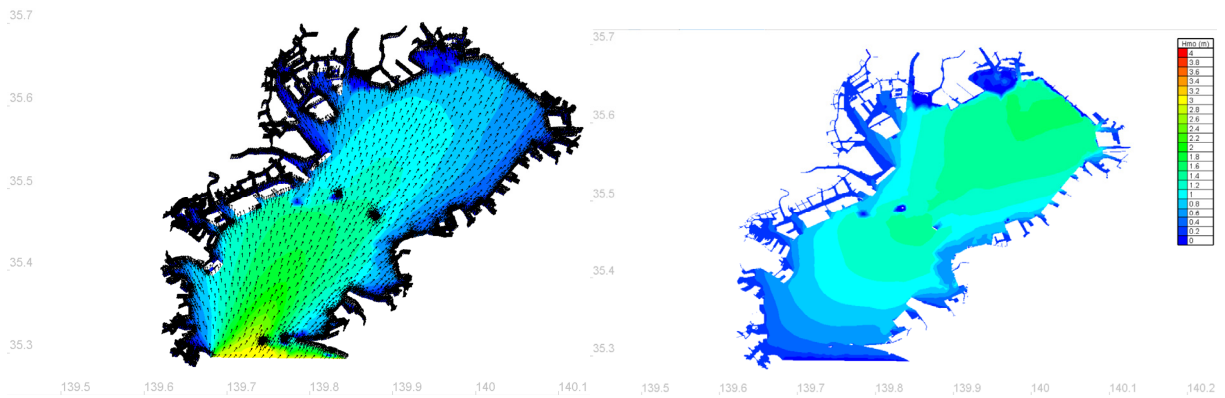

Figure S3.14. Characteristic operational WFS results of  $H_{mo}$  (m) by Model A in **Tokyo (Gulf)** (Japan, West Pacific Ocean) port during SW-S sector rough wave and outer-bay dead calm (only wind-wave generation inside Tokyo Gulf; no. 27 of Table 1) conditions, respectively. Scenarios A#1 (left) and A#2 (right).

| Scenarios | $H_s$ (m) | $T_p$ (s) | $\phi_i$ (°) | Wind Speed  |             |
|-----------|-----------|-----------|--------------|-------------|-------------|
|           |           |           |              | $W_x$ (m/s) | $W_y$ (m/s) |
| A#1       | 1.8       | 4.5       | 45           | 7.07        | 7.07        |
| A#2       | 3.8       | 10.0      | 45           | 14.14       | 14.14       |

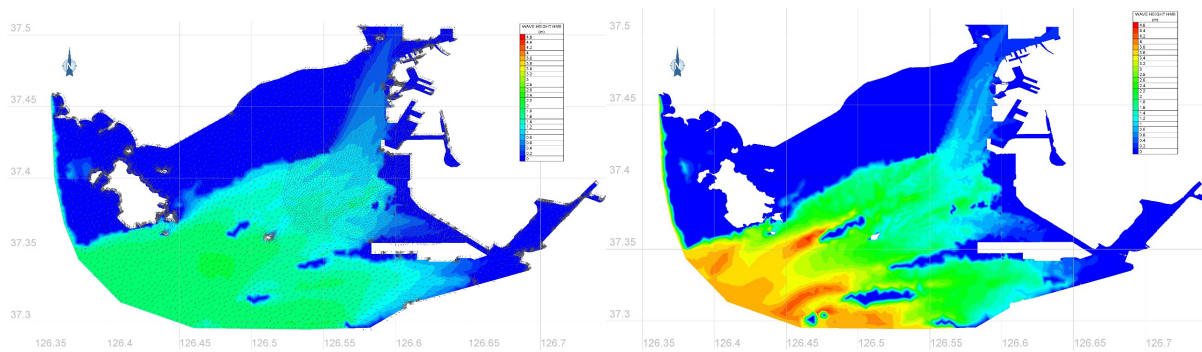

Figure S3.15. Characteristic operational WFS results of  $H_{mo}$  (m) by Model A in **Incheon** (South Korea, Yellow Sea; no. 30 of Table 1) port during SW sector moderate and rough wave conditions. Scenarios A#1 (left) and A#2 (right).

| Scenarios  | $H_s$ (m) | $T_p$ (s) | $\phi_i$ (°) | Wind Speed  |             |
|------------|-----------|-----------|--------------|-------------|-------------|
|            |           |           |              | $W_x$ (m/s) | $W_y$ (m/s) |
| <b>A#1</b> | 1.8       | 4.5       | 45           | 7.07        | 7.07        |
| <b>A#2</b> | 3.8       | 10.0      | 45           | 14.14       | 14.14       |

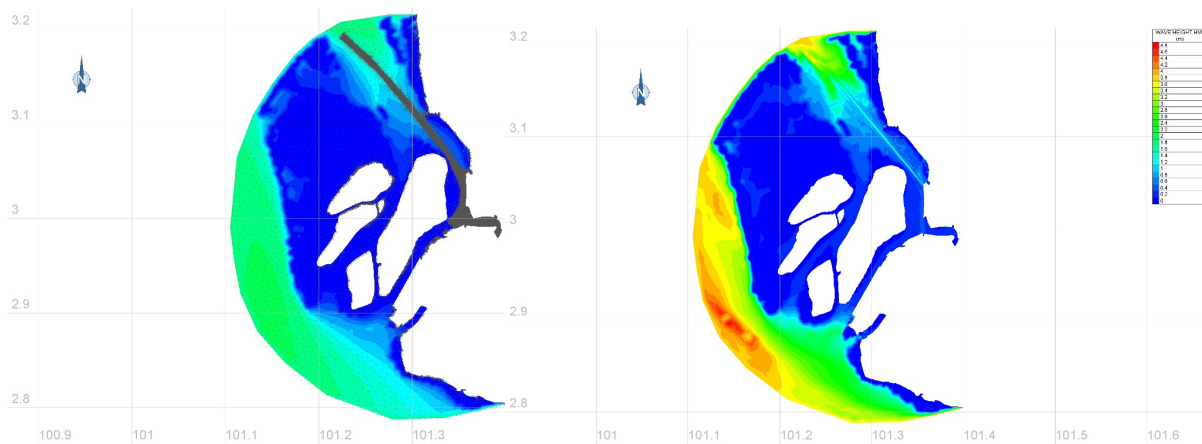

Figure S3.16. Characteristic operational WFS results of  $H_{mo}$  (m) by Model A in **Port Klang** (Malaysia, Malacca Strait, Indian Ocean; no. 33 of Table 1) during SW sector moderate and rough wave conditions. Scenarios A#1 (left) and A#2 (right).

| Scenarios  | $H_s$ (m) | $T_p$ (s) | $\phi_i$ (°) | Wind Speed  |             |
|------------|-----------|-----------|--------------|-------------|-------------|
|            |           |           |              | $W_x$ (m/s) | $W_y$ (m/s) |
| <b>A#1</b> | 2.5       | 6.75      | 0            | 0.0         | 12.0        |
| <b>A#2</b> | 5.5       | 11.0      | 315          | -17.68      | 17.68       |



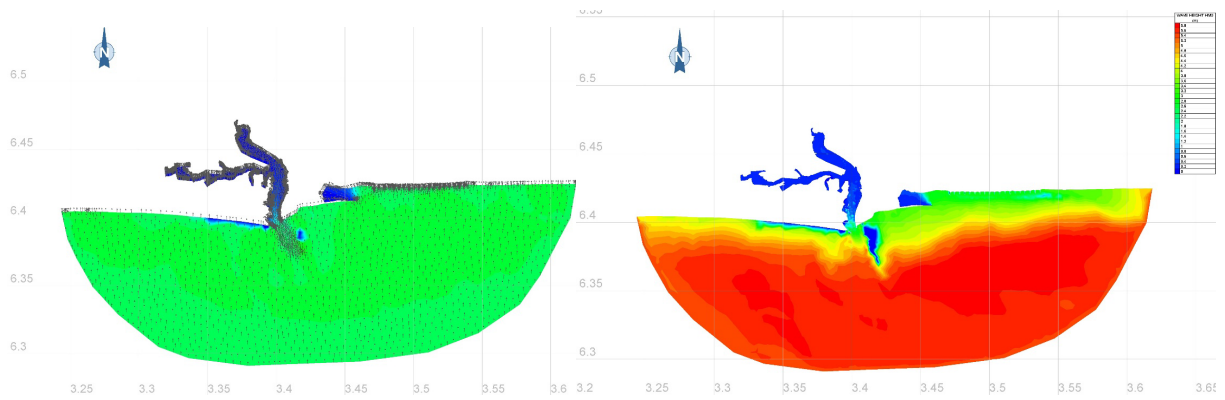

Figure S3.17. Characteristic operational WFS results of  $H_{mo}$  (m) by Model A in **Lagos** (Nigeria, East-central Atlantic Ocean; no. 34 of Table 1) port during S and SE sector moderate and very rough wave conditions. Scenarios A#1 (left) and A#2 (right).

| Scenarios  | $H_s$ (m) | $T_p$ (s) | $\phi_i$ (°) | Wind Speed  |             |
|------------|-----------|-----------|--------------|-------------|-------------|
|            |           |           |              | $W_x$ (m/s) | $W_y$ (m/s) |
| <b>A#1</b> | 1.8       | 4.5       | 135          | 7.07        | -7.07       |
| <b>A#2</b> | 3.8       | 10        | 135          | 14.14       | -14.14      |

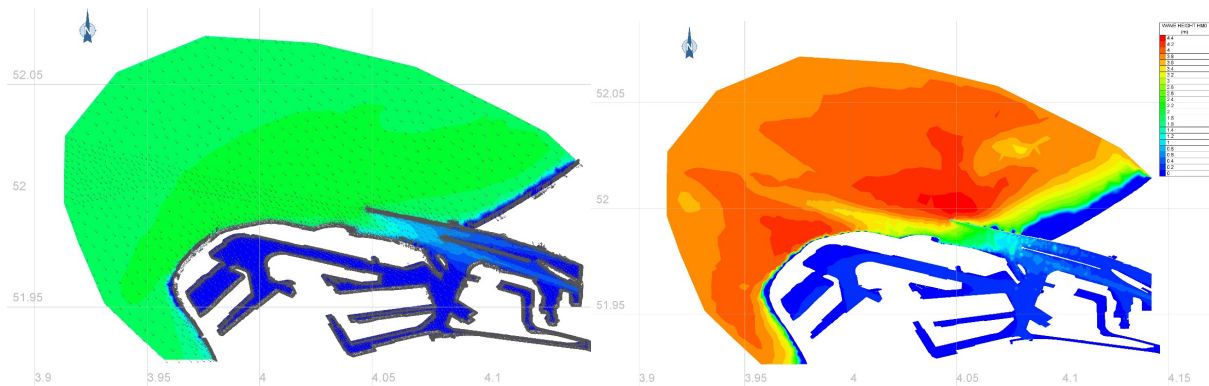

Figure S3.18. Characteristic operational WFS results of  $H_{mo}$  (m) by Model A in **Maasvlakte Rotterdam** (Netherlands, North Sea; no. 36 of Table 1) port during NW sector moderate and rough wave conditions. Scenarios A#1 (left) and A#2 (right).

| Scenarios  | $H_s$ (m) | $T_p$ (s) | $\phi_i$ (°) | Wind Speed  |             |
|------------|-----------|-----------|--------------|-------------|-------------|
|            |           |           |              | $W_x$ (m/s) | $W_y$ (m/s) |
| <b>A#1</b> | 1.8       | 4.5       | 270          | -10.0       | 0.0         |
| <b>A#2</b> | 3.8       | 10.0      | 270          | -20.0       | 0.0         |

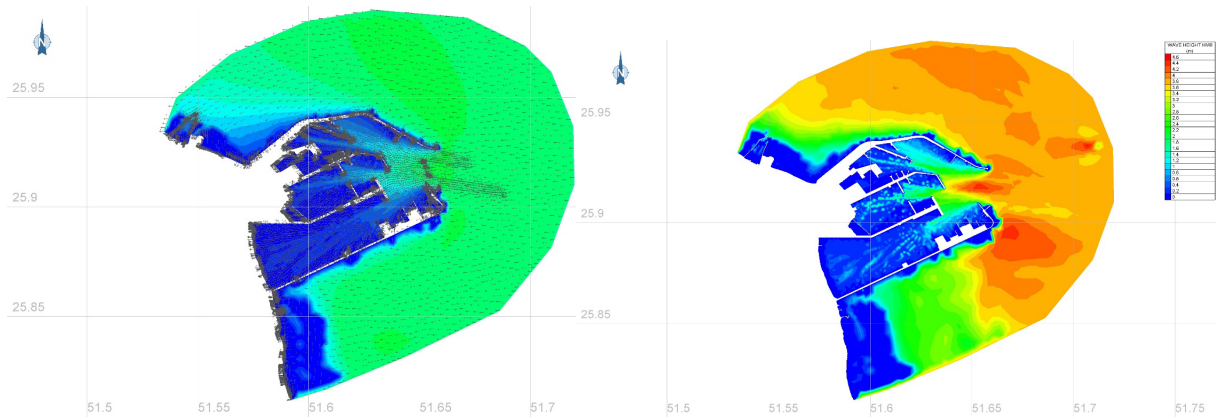

Figure S3.19. Characteristic operational WFS results of  $H_{mo}$  (m) by Model A in **Ras Lufan** (Qatar, Persian Gulf; no. 38 of Table 1) port during W sector moderate and rough wave conditions. Scenarios A#1 (left) and A#2 (right).

| Scenarios | $H_s$ (m) | $T_p$ (s) | $\phi_i$ (°) | Wind Speed  |             |
|-----------|-----------|-----------|--------------|-------------|-------------|
|           |           |           |              | $W_x$ (m/s) | $W_y$ (m/s) |
| A#1       | 1.8       | 4.5       | 270          | -10.0       | 0.0         |
| A#2       | 1.8       | 4.5       | 0            | 0.0         | -10.0       |

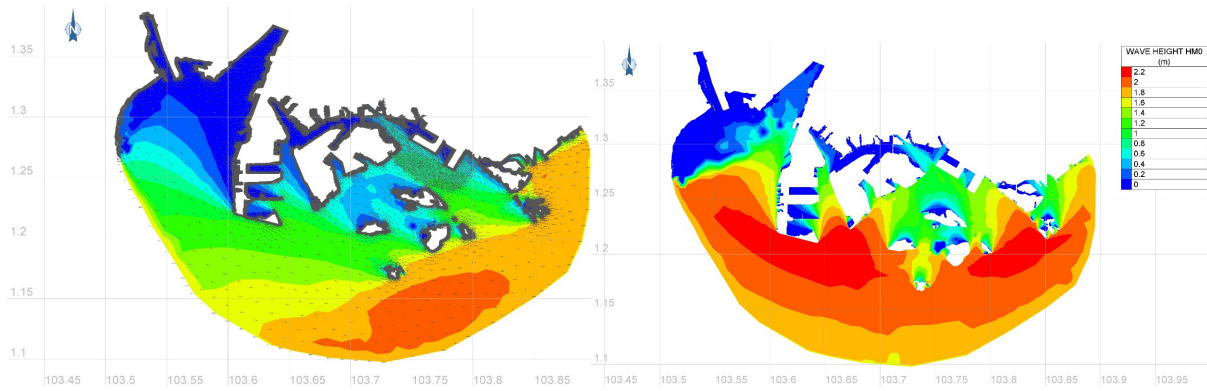

Figure S3.20. Characteristic operational WFS results of  $H_{mo}$  (m) by Model A in **Singapore** (South China Sea; no. 42 of Table 1) port during W and N sector moderate wave conditions. Scenarios A#1 (left) and A#2 (right).

| Scenarios | $H_s$ (m) | $T_p$ (s) | $\phi_i$ (°) | Wind Speed  |             |
|-----------|-----------|-----------|--------------|-------------|-------------|
|           |           |           |              | $W_x$ (m/s) | $W_y$ (m/s) |
| A#1       | 1.8       | 4.5       | 0            | 0           | 10          |
| A#2       | 3.8       | 10        | 0            | 0           | 20          |

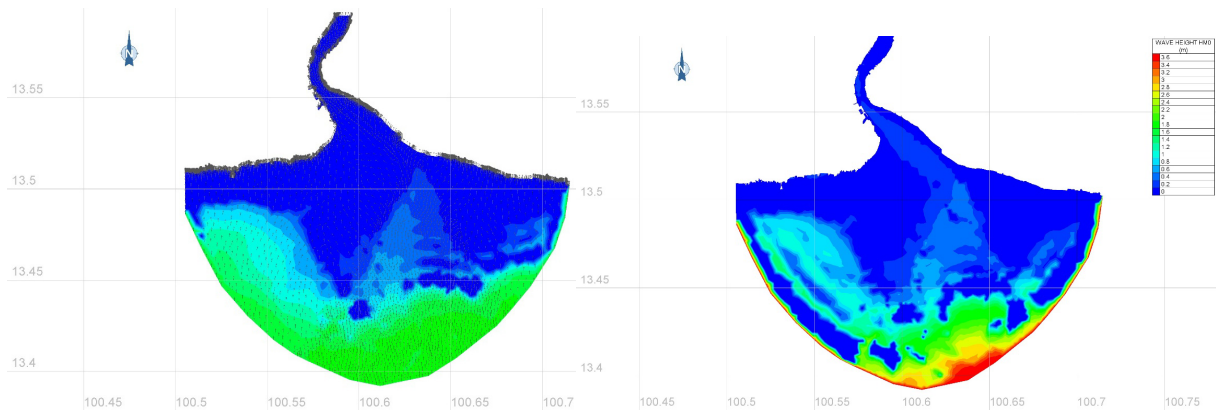

Figure S3.21. Characteristic operational WFS results of  $H_{mo}$  (m) by Model A in **Bangkok** (Thailand, Gulf of Thailand; no. 43 of Table 1) port during N sector moderate and rough wave conditions. Scenarios A#1 (left) and A#2 (right).

| Scenarios  | $H_s$ (m) | $T_p$ (s) | $\phi_i$ (°) | Wind Speed  |             |
|------------|-----------|-----------|--------------|-------------|-------------|
|            |           |           |              | $W_x$ (m/s) | $W_y$ (m/s) |
| <b>A#1</b> | 5.5       | 11.0      | 90           | 25.0        | 0.0         |
| <b>A#2</b> | 5.5       | 11.0      | 0            | 0.0         | 25.0        |

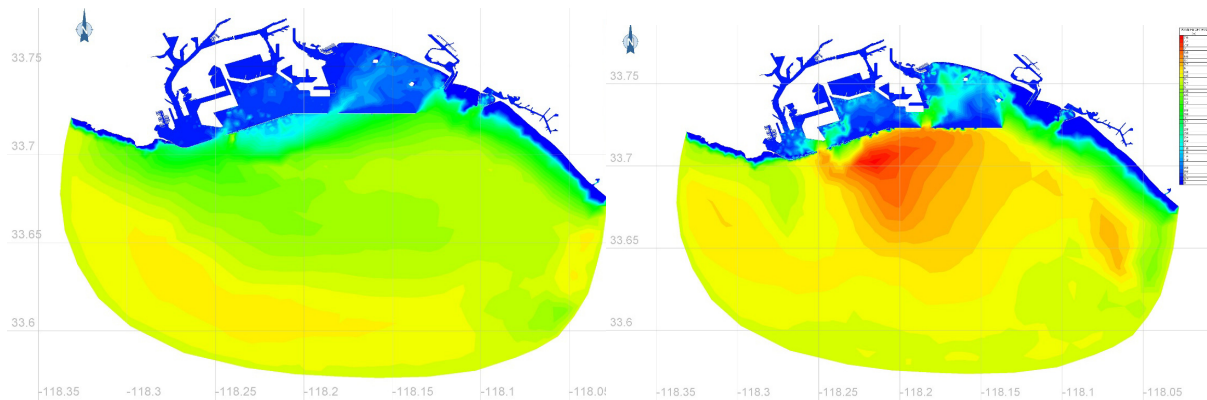

Figure S3.22. Characteristic operational WFS results of  $H_{mo}$  (m) by Model A in **Los Angeles** (USA, East Pacific; no. 46 of Table 1) port during W and N sector very rough wave conditions. Scenarios A#1 (left) and A#2 (right).

| Scenarios  | $H_s$ (m) | $T_p$ (s) | $\phi_i$ (°) | Wind Speed  |             |
|------------|-----------|-----------|--------------|-------------|-------------|
|            |           |           |              | $W_x$ (m/s) | $W_y$ (m/s) |
| <b>A#1</b> | 2.8       | 6.75      | 270          | -13.0       | 0.0         |
| <b>A#2</b> | 3.2       | 10.0      | 315          | -9.19       | -9.19       |



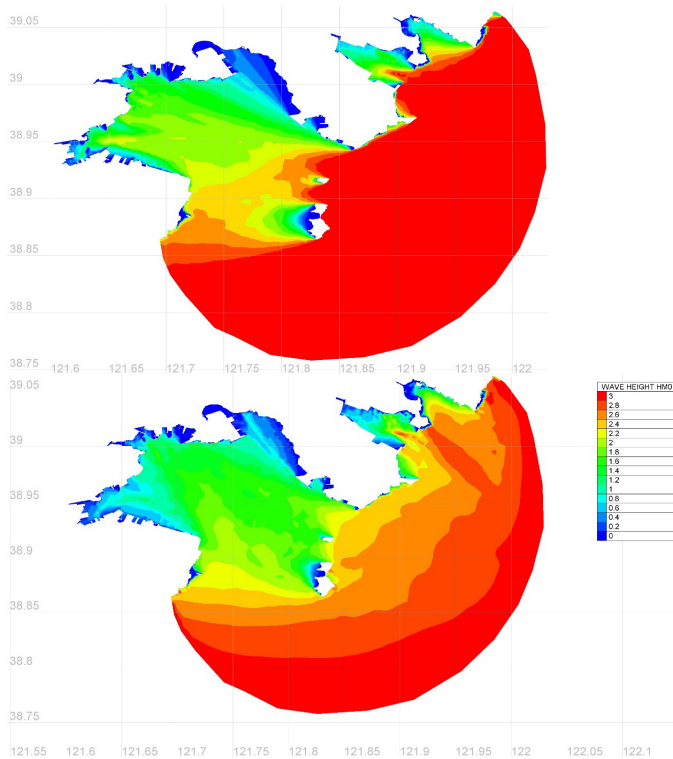

Figure S3.23. Characteristic operational WFS results of  $H_{mo}$  (m) by Model A in **Dalian 1 & 2** (China, Yellow Sea; no. 47 and 49 of Table 1) port during E and SE sector moderate and rough wave conditions. Scenarios A#1 (left) and A#2 (right).

| Scenarios  | $H_s$ (m) | $T_p$ (s) | $\phi_i$ (°) | Wind Speed  |             |
|------------|-----------|-----------|--------------|-------------|-------------|
|            |           |           |              | $W_x$ (m/s) | $W_y$ (m/s) |
| <b>A#1</b> | 2.5       | 6.75      | 315          | -8.49       | 8.49        |
| <b>A#4</b> | 5.5       | 11        | 270          | -25         | 0           |

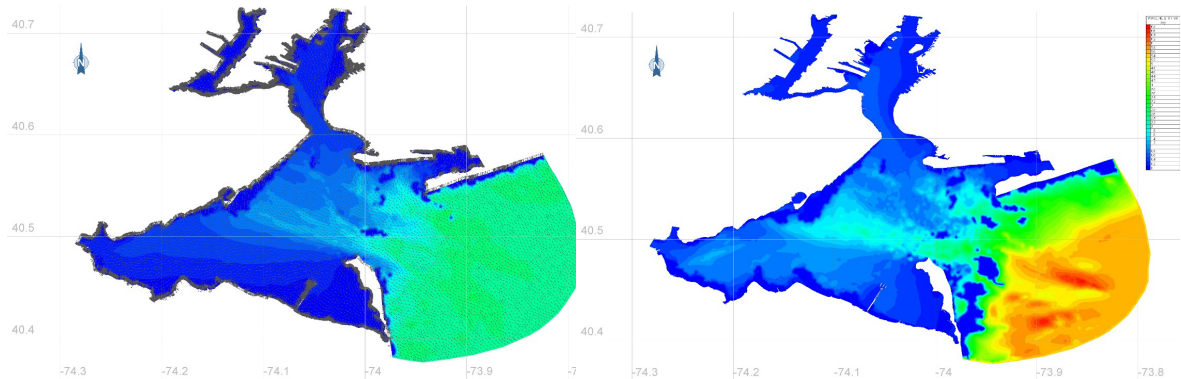

Figure S3.24. Characteristic operational WFS results of  $H_{mo}$  (m) by Model A in **New York** (USA, Northwest Atlantic Ocean; no. 48 of Table 1) port during SE and E sector moderate and very rough wave conditions. Scenarios A#1 (left) and A#2 (right).

| Scenarios  | $H_s$ (m) | $T_p$ (s) | $\phi_i$ (°) | Wind Speed  |             |
|------------|-----------|-----------|--------------|-------------|-------------|
|            |           |           |              | $W_x$ (m/s) | $W_y$ (m/s) |
| <b>A#1</b> | 5.5       | 11.0      | 315          | -17.68      | 17.68       |
| <b>A#2</b> | 3.8       | 10.0      | 225          | -14.14      | -14.14      |

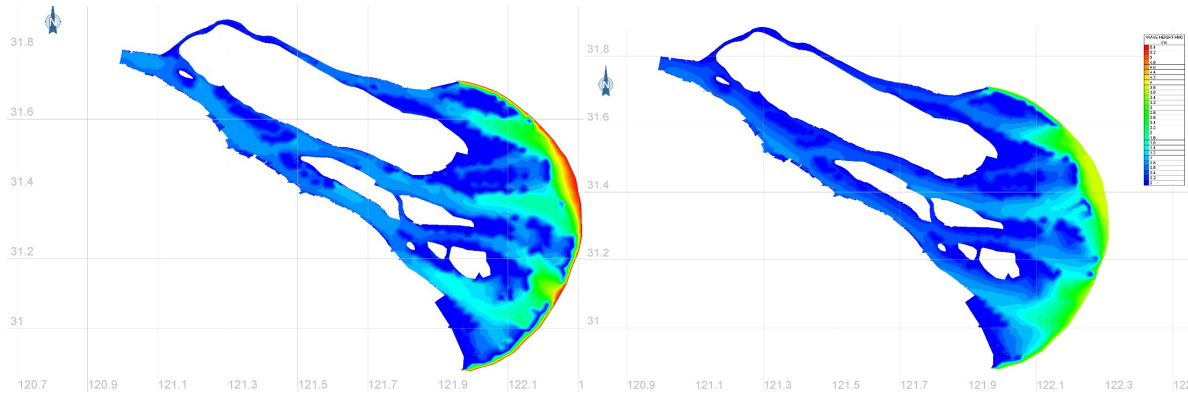

Figure S3.25. Characteristic operational WFS results of  $H_{mo}$  (m) by Model A in **Shanghai** (China, Yellow Sea; no. 50 of Table 1) port during SE and NE sector very rough and rough wave conditions. Scenarios A#1 (left) and A#2 (right).

| Scenarios  | $H_s$ (m) | $T_p$ (s) | $\phi_i$ (°) | Wind Speed  |             |
|------------|-----------|-----------|--------------|-------------|-------------|
|            |           |           |              | $W_x$ (m/s) | $W_y$ (m/s) |
| <b>A#1</b> | 3.8       | 10        | 270          | -20         | 0           |
| <b>A#2</b> | 3.8       | 4.5       | 315          | -7.07       | 7.07        |

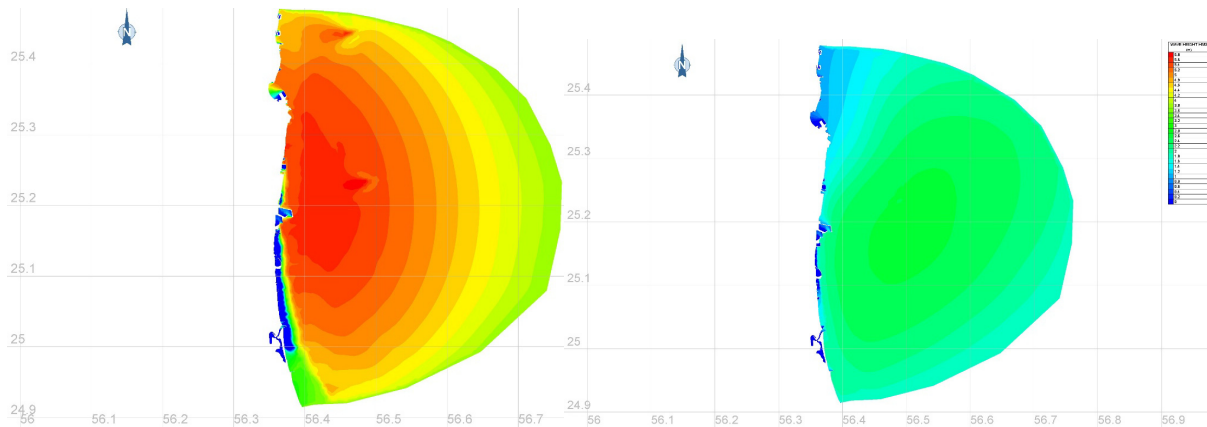

Figure S3.26. Characteristic operational WFS results of  $H_{mo}$  (m) by Model A in **Fujairah** (UAE, Persian Gulf; no. 1 of Table 1) port during SE and NE sector rough wave conditions. Scenarios A#1 (left) and A#2 (right).

| Scenarios  | $H_s$ (m) | $T_p$ (s) | $\phi_i$ (°) | Wind Speed  |             |
|------------|-----------|-----------|--------------|-------------|-------------|
|            |           |           |              | $W_x$ (m/s) | $W_y$ (m/s) |
| <b>A#1</b> | 2.5       | 6.75      | 315          | -8.49       | 8.49        |
| <b>A#2</b> | 5.5       | 11        | 315          | -17.68      | 17.68       |

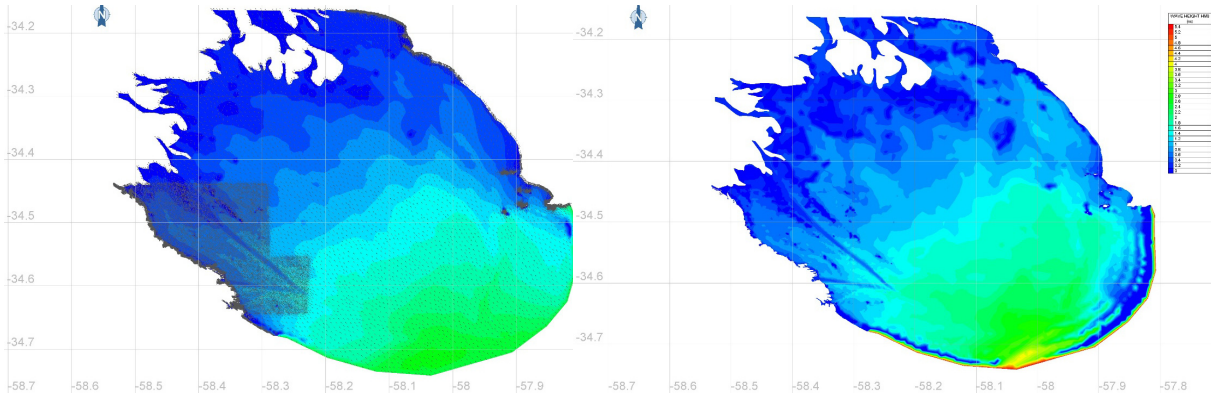

Figure S3.27. Characteristic operational WFS results of  $H_{mo}$  (m) by Model A in **Buenos Aires** (Brazil, South Atlantic Ocean; no. 3 of Table 1) port during SE sector moderate and very rough wave conditions. Scenarios A#1 (left) and A#2 (right).

| Scenarios  | $H_s$ (m) | $T_p$ (s) | $\phi_i$ (°) | Wind Speed  |             |
|------------|-----------|-----------|--------------|-------------|-------------|
|            |           |           |              | $W_x$ (m/s) | $W_y$ (m/s) |
| <b>A#1</b> | 2.5       | 6.75      | 335          | -5.07       | 10.88       |
| <b>A#2</b> | 5.5       | 11        | 335          | -10.57      | 22.66       |

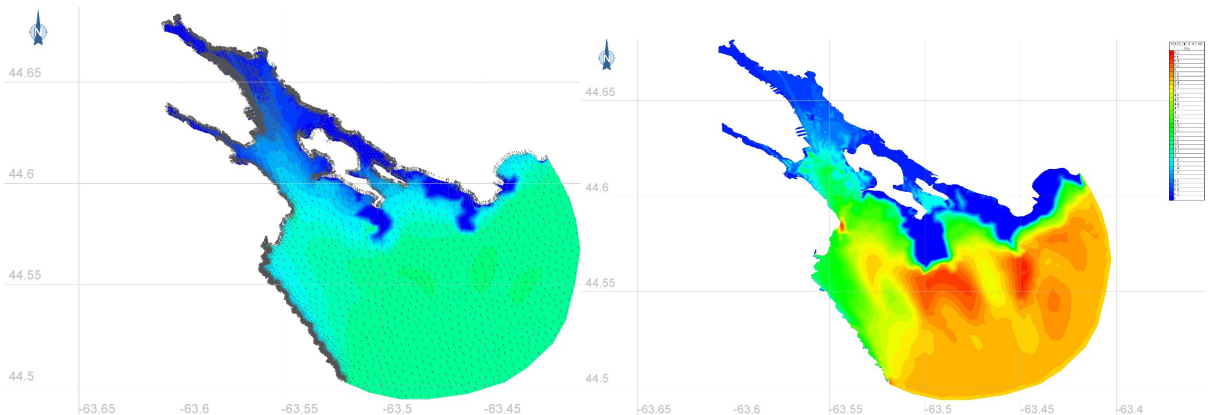

Figure S3.28. Characteristic operational WFS results of  $H_{mo}$  (m) by Model A in **Halifax** (Canada, North Atlantic Ocean; no. 8 of Table 1) port during SE sector moderate and very rough wave conditions. Scenarios A#1 (left) and A#2 (right).



| Scenarios | $H_s$ (m) | $T_p$ (s) | $\phi_i$ (°) | Wind Speed  |             |
|-----------|-----------|-----------|--------------|-------------|-------------|
|           |           |           |              | $W_x$ (m/s) | $W_y$ (m/s) |
| A#1       | 3.8       | 10        | 135          | 14.14       | -14.14      |
| A#2       | 1.8       | 4.5       | 90           | 10          | 0           |

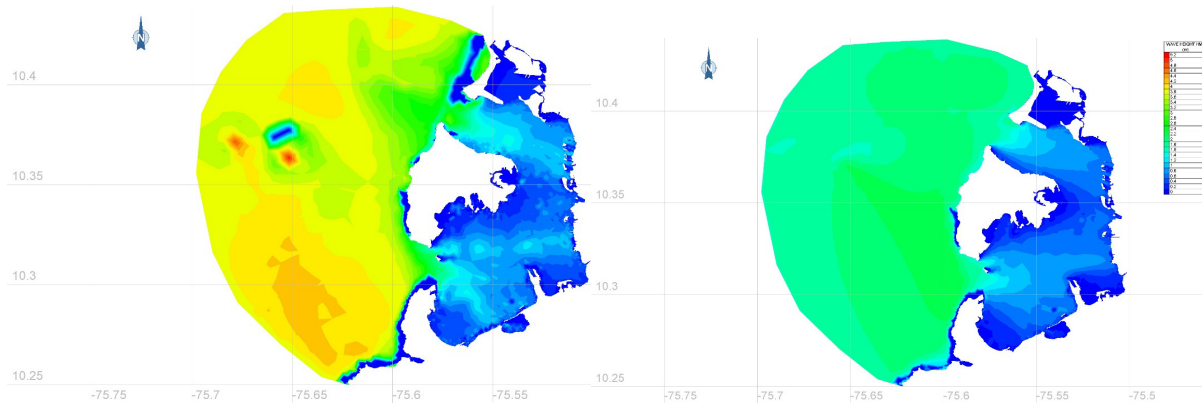

Figure S3.29. Characteristic operational WFS results of  $H_{mo}$  (m) by Model A in **Cartagena** (Colombia, Caribbean Sea; no. 9 of Table 1) port during SE sector rough and moderate wave conditions. Scenarios A#1 (left) and A#2 (right).

| Scenarios | $H_s$ (m) | $T_p$ (s) | $\phi_i$ (°) | Wind Speed  |             |
|-----------|-----------|-----------|--------------|-------------|-------------|
|           |           |           |              | $W_x$ (m/s) | $W_y$ (m/s) |
| A#1       | 1.8       | 4.5       | 315          | -7.07       | 7.07        |
| A#2       | 3.8       | 10.0      | 315          | -14.14      | 14.14       |

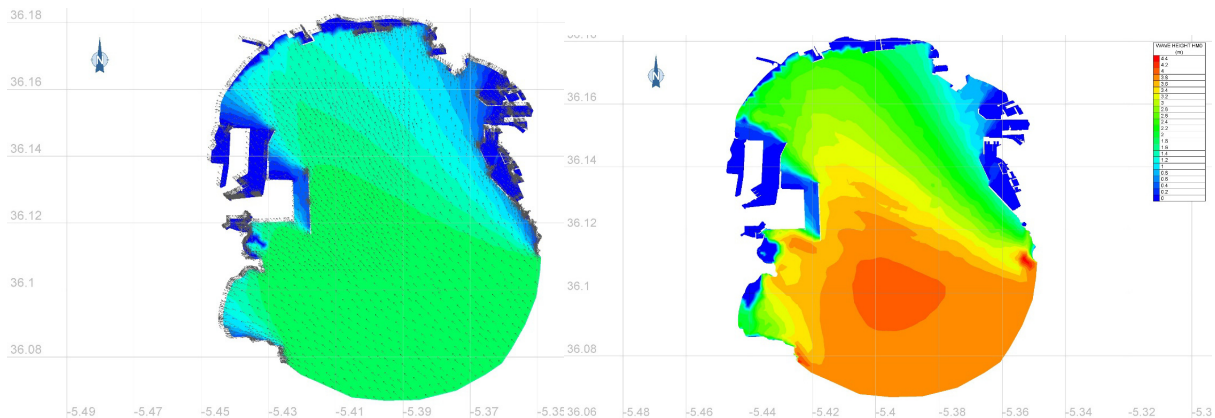

Figure S3.30. Characteristic operational WFS results of  $H_{mo}$  (m) by Model A in **Algeciras** (Spain, West Mediterranean Sea; no. 12 of Table 1) port during SE sector moderate and rough wave conditions. Scenarios A#1 (left) and A#2 (right).

| Scenarios | $H_s$ (m) | $T_p$ (s) | $\phi_i$ (°) | Wind Speed | SWL (m) |
|-----------|-----------|-----------|--------------|------------|---------|
|-----------|-----------|-----------|--------------|------------|---------|

|            |     |     |     | $W_x$ (m/s) | $W_y$ (m/s) |      |
|------------|-----|-----|-----|-------------|-------------|------|
| <b>A#1</b> | 1.8 | 4.5 | 135 | 7.07        | -7.07       | 0.0  |
| <b>A#4</b> | 3.8 | 10  | 135 | 14.14       | -14.14      | +6.0 |

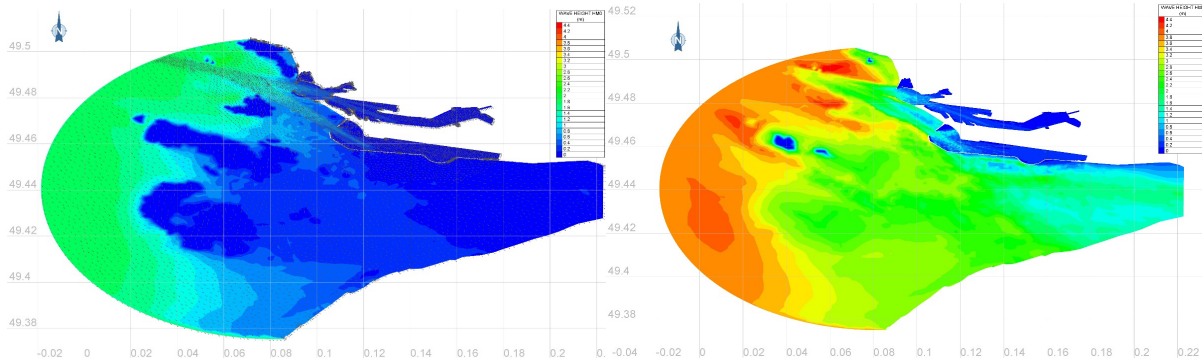

Figure S3.31. Characteristic operational WFS results of  $H_{mo}$  (m) by Model A in **Le Havre** (France, East Atlantic Ocean; no. 14 of Table 1) port during NW sector moderate and rough wave conditions. Scenarios A#1 (left) and A#2 (right).

| Scenarios  | $H_s$ (m) | $T_p$ (s) | $\phi_i$ (°) | Wind Speed  |             |
|------------|-----------|-----------|--------------|-------------|-------------|
|            |           |           |              | $W_x$ (m/s) | $W_y$ (m/s) |
| <b>A#1</b> | 3.8       | 10        | 90           | 20          | 0           |
| <b>A#2</b> | 1.8       | 4.5       | 180          | 0           | -10         |

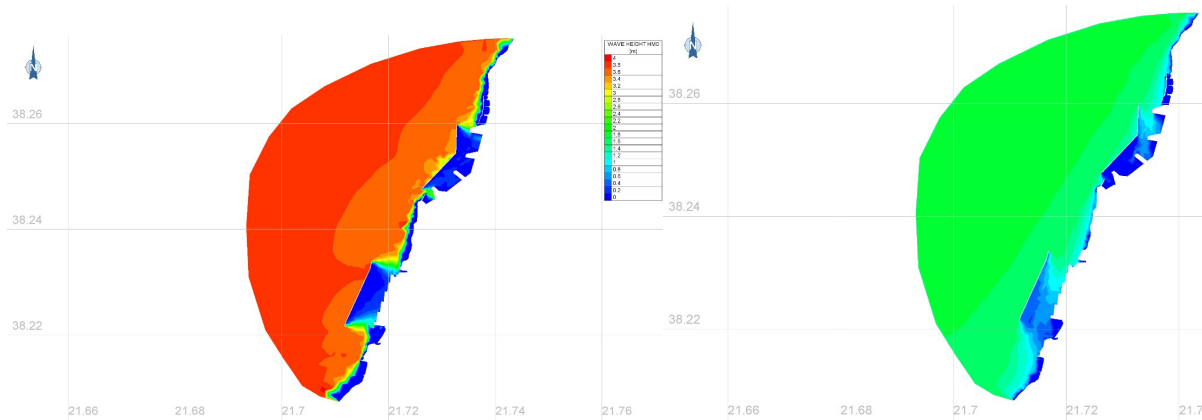

Figure S3.32. Characteristic operational WFS results of  $H_{mo}$  (m) by Model A in **Patra** (Greece, East-central Mediterranean Sea; no. 16 of Table 1) port during NW sector rough and moderate wave conditions. Scenarios A#1 (left) and A#2 (right).

| Scenarios | $H_s$ (m) | $T_p$ (s) | $\phi_i$ (°) | Wind Speed  |             |
|-----------|-----------|-----------|--------------|-------------|-------------|
|           |           |           |              | $W_x$ (m/s) | $W_y$ (m/s) |

|            |     |     |     |       |      |
|------------|-----|-----|-----|-------|------|
| <b>A#1</b> | 3.8 | 10  | 0   | 0     | 20   |
| <b>A#2</b> | 1.8 | 4.5 | 315 | -7.07 | 7.07 |

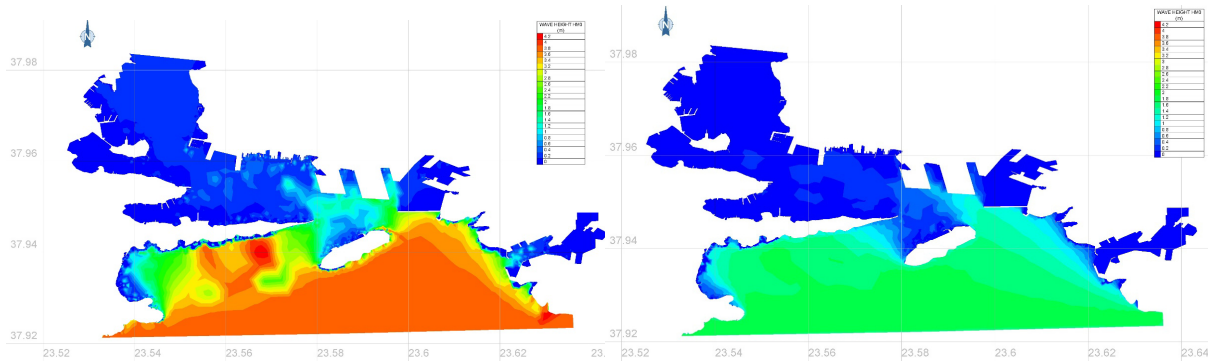

Figure S3.33. Characteristic operational WFS results of  $H_{mo}$  (m) by Model A in **Piraeus** (Greece, West-central Aegean Sea; no. 17 of Table 1) port during S and SE sector rough and moderate wave conditions. Scenarios A#1 (left) and A#2 (right).

| Scenarios  | $H_s$ (m) | $T_p$ (s) | $\phi_i$ (°) | Wind Speed  |             |
|------------|-----------|-----------|--------------|-------------|-------------|
|            |           |           |              | $W_x$ (m/s) | $W_y$ (m/s) |
| <b>A#1</b> | 3.8       | 10.0      | 45           | 10.6        | 10.6        |
| <b>A#2</b> | 3.8       | 10.0      | 0            | 0.0         | 15.0        |

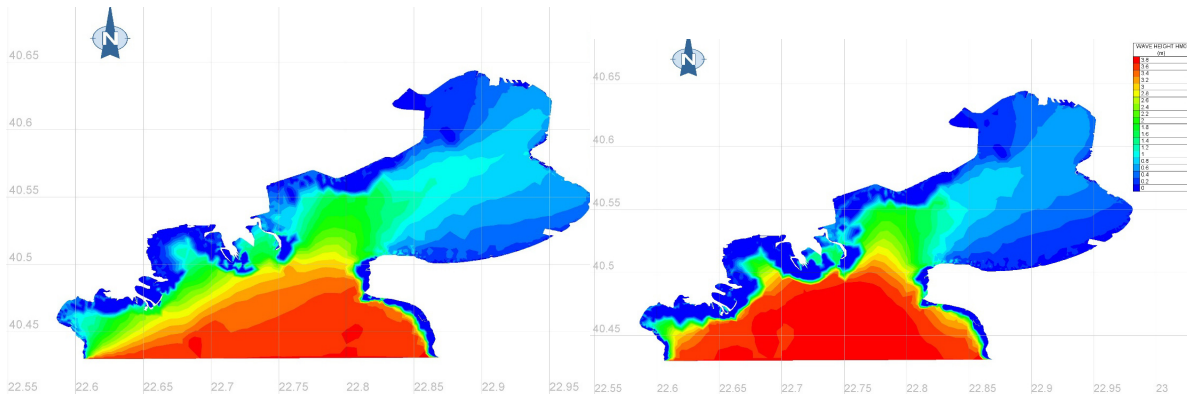

Figure S3.34. Characteristic operational WFS results of  $H_{mo}$  (m) by Model A in **Thessaloniki** (Greece, North-western Aegean Sea; no. 18 of Table 1) port during SW and S sector rough wave conditions. Scenarios A#1 (left) and A#2 (right).

| Scenarios  | $H_s$ (m) | $T_p$ (s) | $\phi_i$ (°) | Wind Speed  |             |
|------------|-----------|-----------|--------------|-------------|-------------|
|            |           |           |              | $W_x$ (m/s) | $W_y$ (m/s) |
| <b>A#1</b> | 1.8       | 4.5       | 270          | -10.0       | 0.0         |



|            |     |      |     |       |      |
|------------|-----|------|-----|-------|------|
| <b>A#2</b> | 3.8 | 10.0 | 315 | -10.6 | 10.6 |
|------------|-----|------|-----|-------|------|

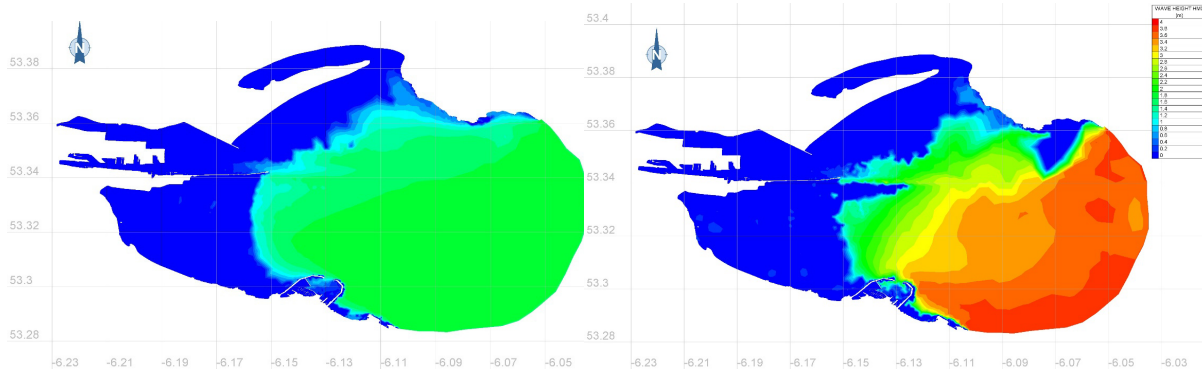

Figure S3.35. Characteristic operational WFS results of  $H_{mo}$  (m) by Model A in **Dublin** (Ireland, North Sea; no. 21 of Table 1) port during E and SE sector moderate and rough wave conditions. Scenarios A#1 (left) and A#2 (right).

| Scenarios  | $H_s$ (m) | $T_p$ (s) | $\phi_i$ (°) | Wind Speed  |             |
|------------|-----------|-----------|--------------|-------------|-------------|
|            |           |           |              | $W_x$ (m/s) | $W_y$ (m/s) |
| <b>A#1</b> | 3.8       | 10        | 180          | 0           | -20         |
| <b>A#2</b> | 1.8       | 4.5       | 135          | 7.07        | 7.07        |

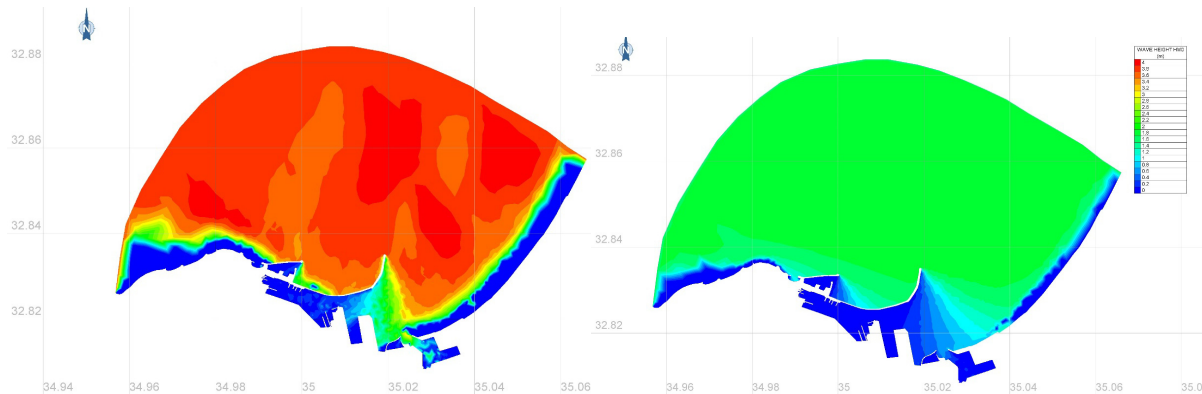

Figure S3.36. Characteristic operational WFS results of  $H_{mo}$  (m) by Model A in **Haifa** (Israel, East Mediterranean Sea; no. 22 of Table 1) port during N and NW sector rough and moderate wave conditions. Scenarios A#1 (left) and A#2 (right).

| Scenarios  | $H_s$ (m) | $T_p$ (s) | $\phi_i$ (°) | Wind Speed  |             |
|------------|-----------|-----------|--------------|-------------|-------------|
|            |           |           |              | $W_x$ (m/s) | $W_y$ (m/s) |
| <b>A#1</b> | 2.5       | 6.75      | 50           | 11.49       | 9.64        |
| <b>A#2</b> | 2.5       | 6.75      | 290          | -11.27      | 4.10        |

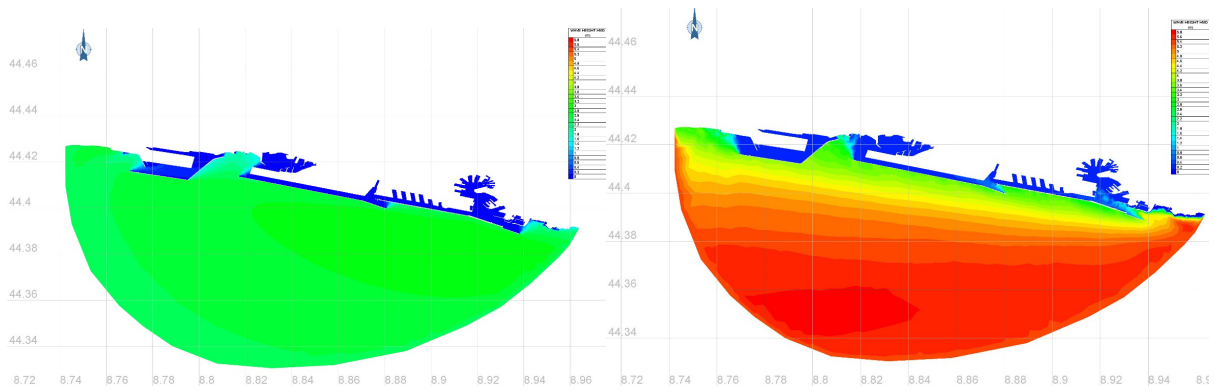

Figure S3.37. Characteristic operational WFS results of  $H_{mo}$  (m) by Model A in **Genova** (Italy, North Mediterranean Sea; no. 25 of Table 1) port during SW and E-SE sector moderate wave conditions. Scenarios A#1 (left) and A#2 (right).

| Scenarios  | $H_s$ (m) | $T_p$ (s) | $\phi_i$ (°) | Wind Speed  |             |
|------------|-----------|-----------|--------------|-------------|-------------|
|            |           |           |              | $W_x$ (m/s) | $W_y$ (m/s) |
| <b>A#1</b> | 1.8       | 4.5       | 340          | -3.42       | 9.40        |
| <b>A#2</b> | 3.8       | 10        | 340          | -6.84       | 18.79       |

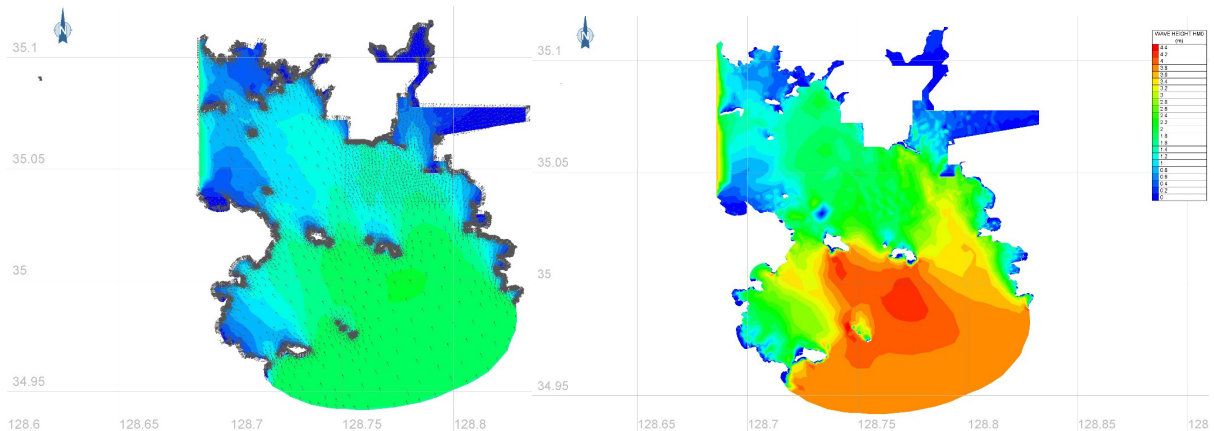

Figure S3.38. Characteristic operational WFS results of  $H_{mo}$  (m) by Model A in **Busan** (South Korea, Yellow Sea; no. 29 of Table 1) port during S-SE sector moderate and rough wave conditions. Scenarios A#1 (left) and A#2 (right).

| Scenarios  | $H_s$ (m) | $T_p$ (s) | $\phi_i$ (°) | Wind Speed  |             |
|------------|-----------|-----------|--------------|-------------|-------------|
|            |           |           |              | $W_x$ (m/s) | $W_y$ (m/s) |
| <b>A#1</b> | 5.5       | 11        | 90           | 25          | 0           |
| <b>A#2</b> | 3.8       | 10        | 150          | 10          | -17.32      |

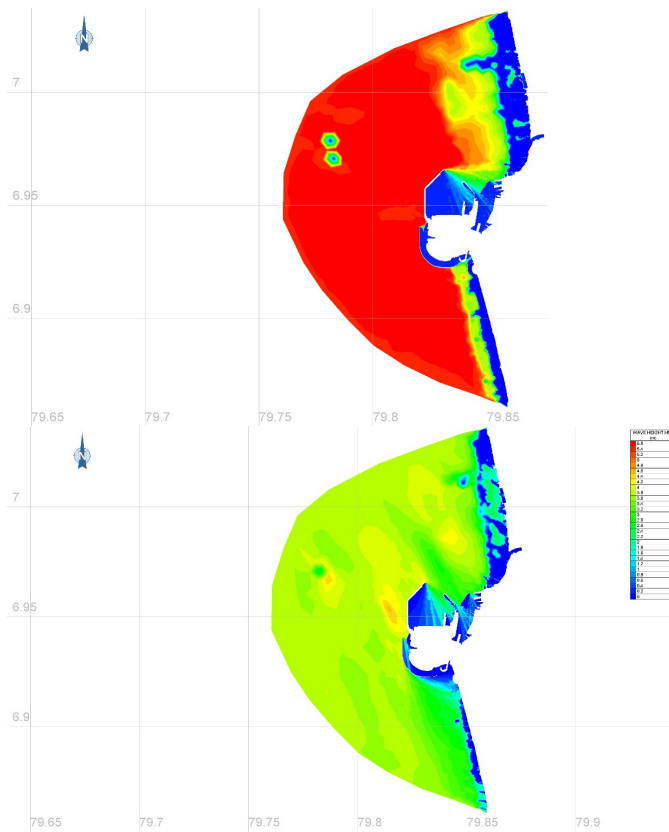

Figure S3.39. Characteristic operational WFP results of  $H_{mo}$  (m) by Model A in **Colombo** (Sri Lanka, Laccadive Sea; no. 31 of Table 1) port during W and NW sector very rough and moderate wave conditions. Scenarios A#1 (left) and A#2 (right).

| Scenarios  | $H_s$ (m) | $T_p$ (s) | $\phi_i$ (°) | Wind Speed  |             |
|------------|-----------|-----------|--------------|-------------|-------------|
|            |           |           |              | $W_x$ (m/s) | $W_y$ (m/s) |
| <b>A#1</b> | 2.5       | 6.75      | 235          | -9.83       | -6.88       |
| <b>A#2</b> | 5.5       | 11.0      | 90           | 25.0        | 0.0         |

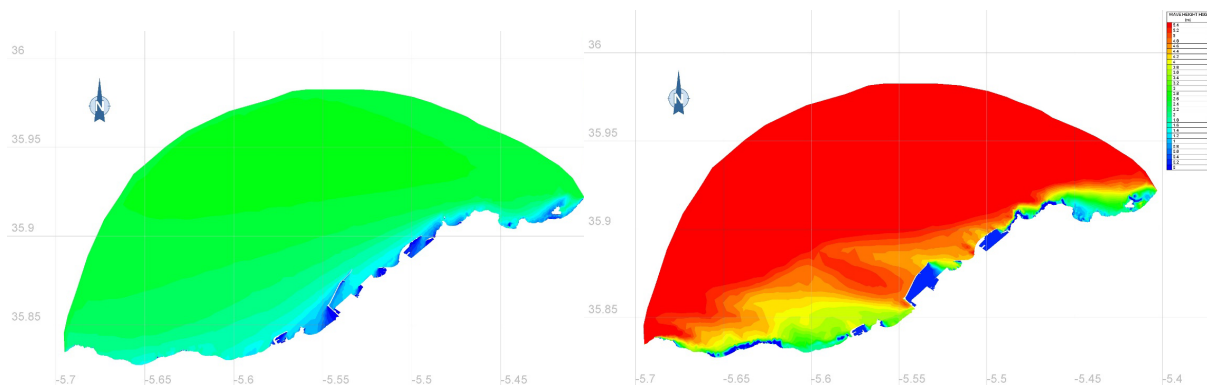

Figure S3.40. Characteristic operational WFP results of  $H_{mo}$  (m) by Model A in **Tanger Med** (Morocco, West Mediterranean Sea; no. 32 of Table 1) port during NE and W sector moderate and very rough wave conditions. Scenarios A#1 (left) and A#2 (right).



| Scenarios  | $H_s$ (m) | $T_p$ (s) | $\phi_i$ (°) | Wind Speed  |             |
|------------|-----------|-----------|--------------|-------------|-------------|
|            |           |           |              | $W_x$ (m/s) | $W_y$ (m/s) |
| <b>A#1</b> | 1.8       | 4.5       | 135          | 7.07        | -7.07       |
| <b>A#2</b> | 3.8       | 10.0      | 135          | 14.14       | -14.14      |

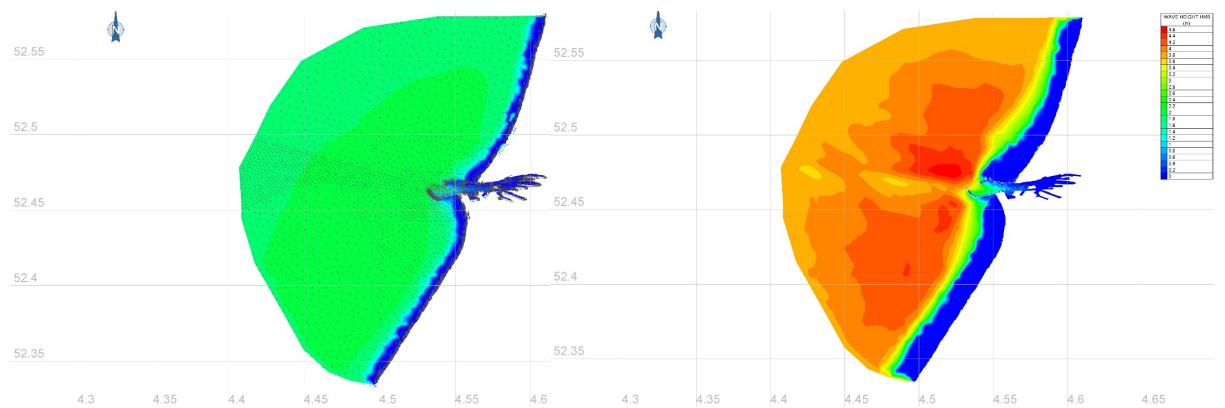

Figure S3.41. Characteristic operational WFP results of  $H_{mo}$  (m) by Model A in **IJmuiden** (Netherlands, North Sea; no. 35 of Table 1) port during NW sector moderate and rough wave conditions. Scenarios A#1 (left) and A#2 (right).

| Scenarios  | $H_s$ (m) | $T_p$ (s) | $\phi_i$ (°) | Wind Speed  |             |
|------------|-----------|-----------|--------------|-------------|-------------|
|            |           |           |              | $W_x$ (m/s) | $W_y$ (m/s) |
| <b>A#1</b> | 2.5       | 6.75      | 90           | 15          | 0           |
| <b>A#2</b> | 5.5       | 11        | 90           | 25          | 0           |

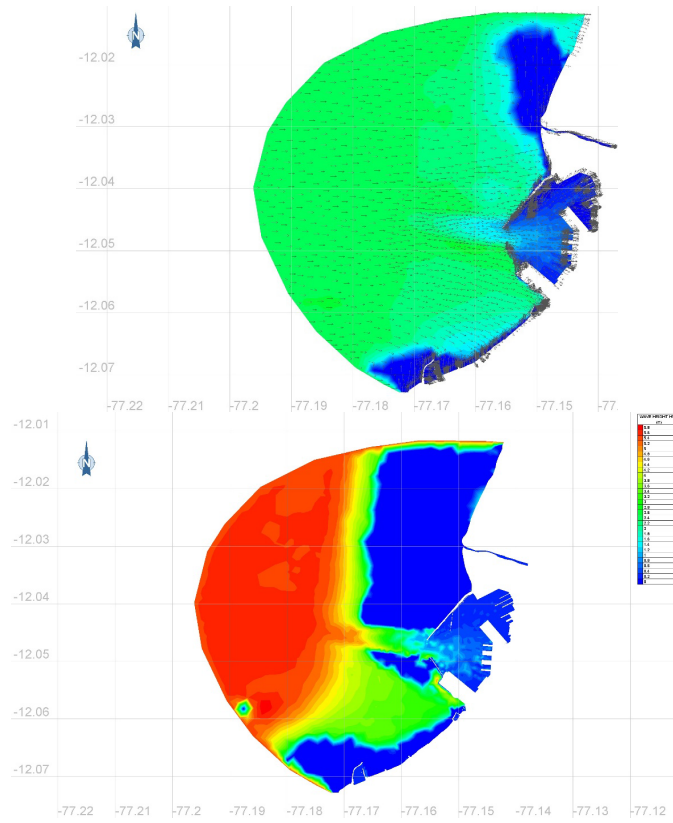

Figure S3.42. Characteristic operational WFP results of  $H_{mo}$  (m) by Model A in **Callao** (Peru, South Pacific Ocean; no. 37 of Table 1) port during W sector moderate and very rough wind wave and swell conditions. Scenarios A#1 (left) and A#2 (right).

| Scenarios  | $H_s$ (m) | $T_p$ (s) | $\phi_i$ (°) | Wind Speed  |             |
|------------|-----------|-----------|--------------|-------------|-------------|
|            |           |           |              | $W_x$ (m/s) | $W_y$ (m/s) |
| <b>A#1</b> | 2.5       | 6.75      | 0            | 0           | 12          |
| <b>A#2</b> | 5.5       | 11        | 315          | -17.68      | 17.68       |

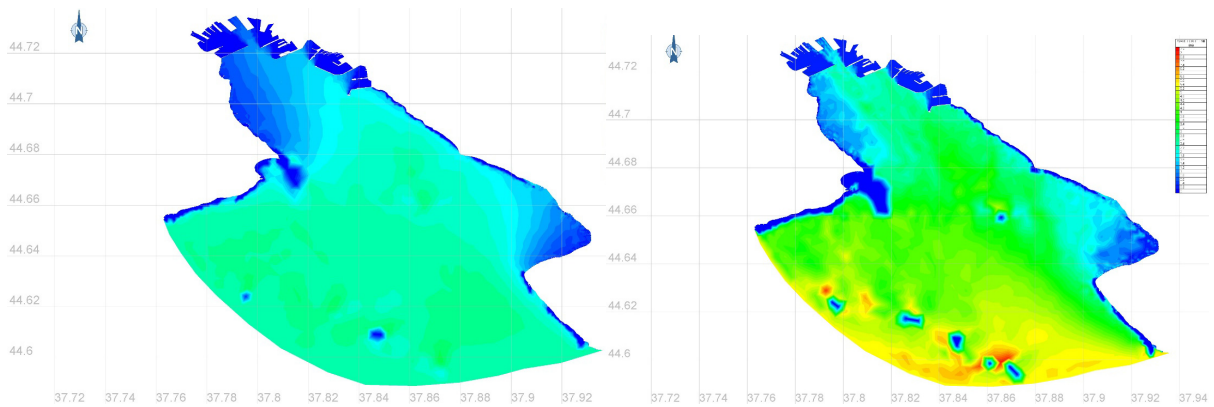

Figure S3.43. Characteristic operational WFP results of  $H_{mo}$  (m) by Model A in **Novorossiysk** (Russia, Black Sea; no. 40 of Table 1) port during S and SE sector moderate and very rough wind wave and swell conditions. Scenarios A#1 (left) and A#2 (right).

| Scenarios  | $H_s$ (m) | $T_p$ (s) | $\phi_i$ (°) | Wind Speed  |             |
|------------|-----------|-----------|--------------|-------------|-------------|
|            |           |           |              | $W_x$ (m/s) | $W_y$ (m/s) |
| <b>A#1</b> | 3.8       | 10        | 45           | 14.14       | 14.14       |
| <b>A#2</b> | 1.8       | 4.5       | 90           | 10          | 0           |

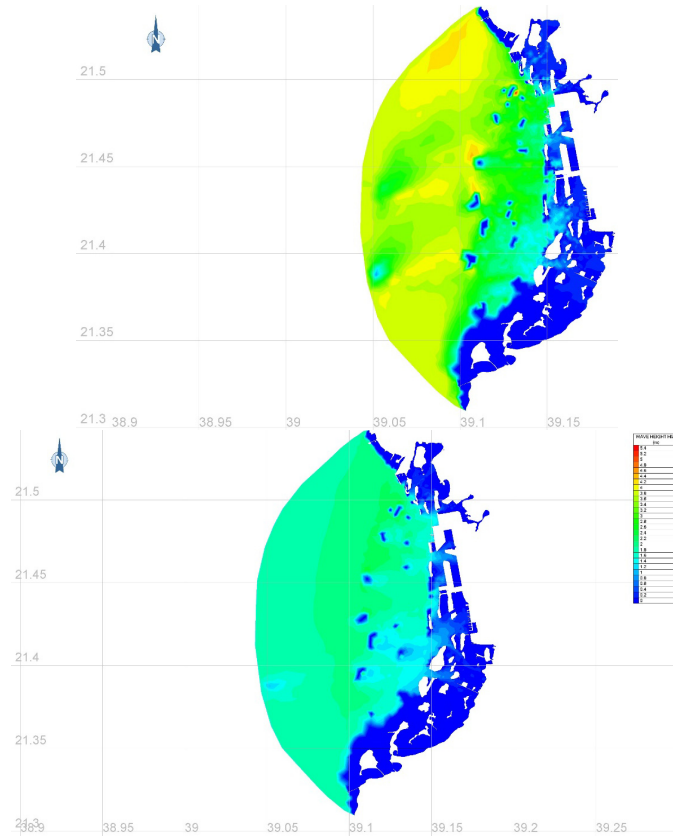

Figure S3.44. Characteristic operational WFP results of  $H_{mo}$  (m) by Model A in **Jeddah** (Saudi Arabia, Red Sea; no. 41 of Table 1) port during SW and W sector rough and moderate wind wave and swell conditions. Scenarios A#1 (left) and A#2 (right).

| Scenarios  | $H_s$ (m) | $T_p$ (s) | $\phi_i$ (°) | Wind Speed  |             |
|------------|-----------|-----------|--------------|-------------|-------------|
|            |           |           |              | $W_x$ (m/s) | $W_y$ (m/s) |
| <b>A#1</b> | 3.8       | 10.0      | 315          | -14.14      | 14.14       |
| <b>A#2</b> | 1.8       | 4.5       | 0            | 0.0         | 10.0        |



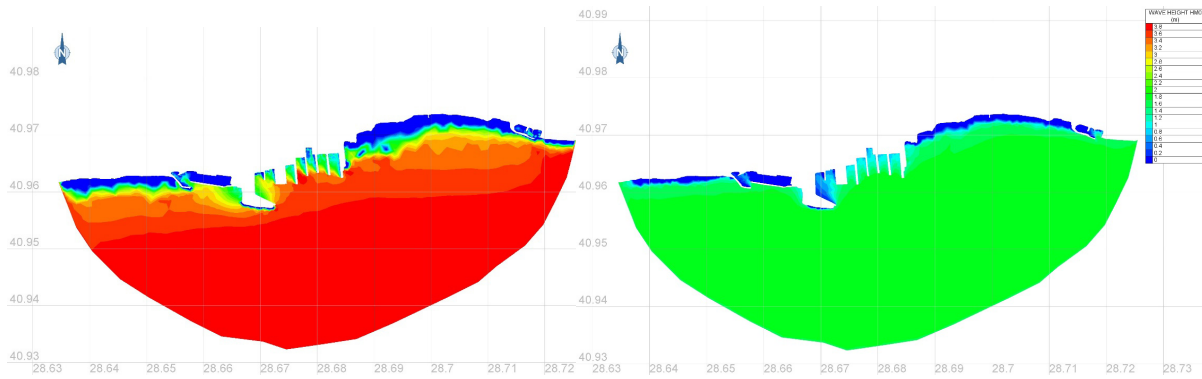

Figure S3.45. Characteristic operational WFP results of  $H_{mo}$  (m) by Model A in **Ambarli** (Turkey, Sea of Marmara; no. 44 of Table 1) port during SE and S sector rough and moderate wind wave and swell conditions. Scenarios A#1 (left) and A#2 (right).

| Scenarios  | $H_s$ (m) | $T_p$ (s) | $\phi_i$ (°) | Wind Speed  |             |
|------------|-----------|-----------|--------------|-------------|-------------|
|            |           |           |              | $W_x$ (m/s) | $W_y$ (m/s) |
| <b>A#1</b> | 2.80      | 6.75      | 180          | 0           | -13         |
| <b>A#2</b> | 2.80      | 6.75      | 225          | -9.19       | -9.19       |

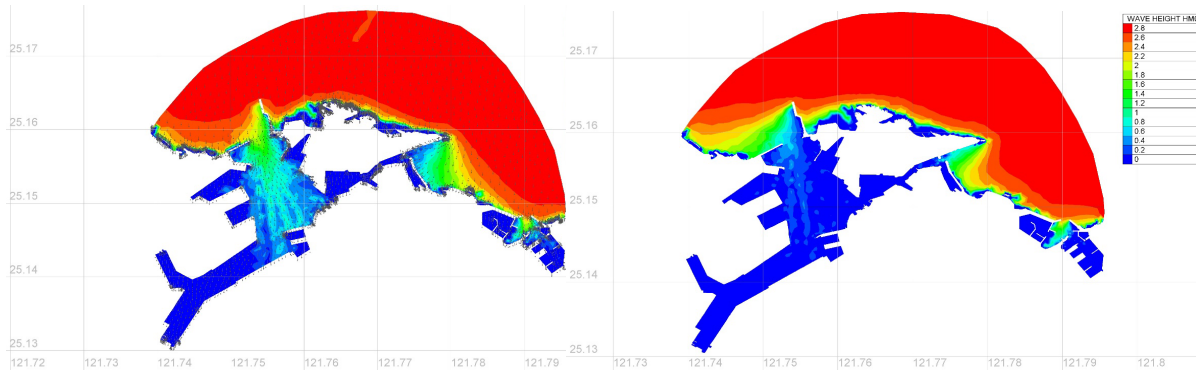

Figure S3.46. Characteristic operational WFP results of  $H_{mo}$  (m) by Model A in **Keelung** (Taiwan, East China Sea; no. 45 of Table 1) port during N and NW sector moderate wind wave and swell conditions. Scenarios A#1 (left) and A#2 (right).

Supplementary Material S4

Figures of characteristic results by simulations with Model B in 22 of the aforesaid 49 ports are provided. All simulations refer to typical (unity for height) wave conditions and highly detailed depictions of the wave-induced agitation inside and around the entrance of the harbour basins (Model B).

| Scenarios | H <sub>s</sub> (m) | T <sub>p</sub> (s) | ϕ <sub>i</sub> (°) | t <sub>sim</sub> (s) |
|-----------|--------------------|--------------------|--------------------|----------------------|
| B#1 (2.1) | 1.00               | 8.00               | 270                | 1200                 |
| B#2 (2.2) | 1.00               | 8.00               | 315                | 1200                 |
| B#3 (2.3) | 1.00               | 8.00               | 225                | 1200                 |

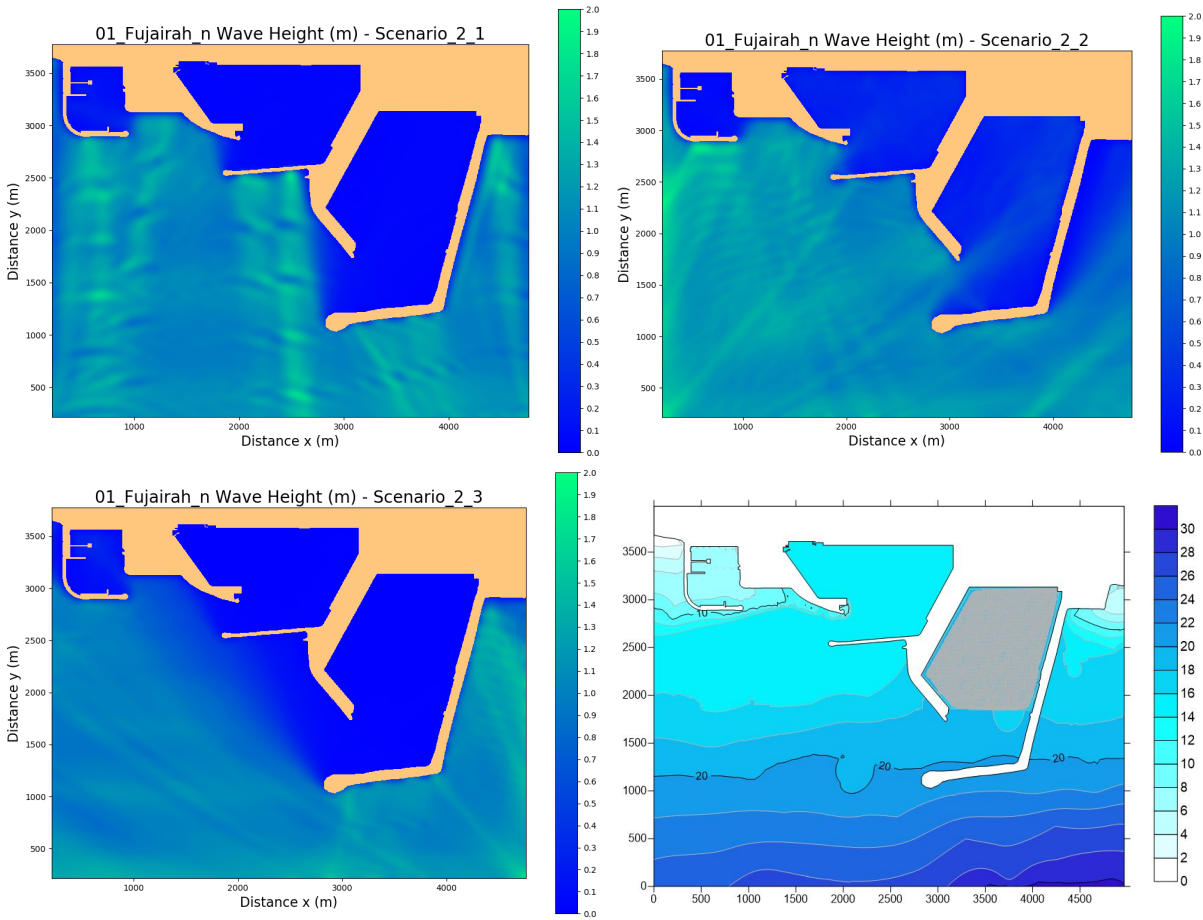

Figure S4.1. Characteristic operational WFS results of H<sub>s</sub> (m) by Model B in **Fujairah** (UAE; no. 1 of Table 1) port during E, SE, and NE sector incoming waves of H<sub>s</sub>=1m (port orientation is turned 90° clockwise).

| Scenarios | $H_s$ (m) | $T_p$ (s) | $\phi_i$ (°) | $t_{sim}$ (s) |
|-----------|-----------|-----------|--------------|---------------|
| B#1 (3.1) | 1.00      | 12.0      | 270          | 1000          |
| B#2 (3.2) | 1.00      | 12.0      | 315          | 1000          |
| B#3 (3.3) | 1.00      | 12.0      | 225          | 1000          |

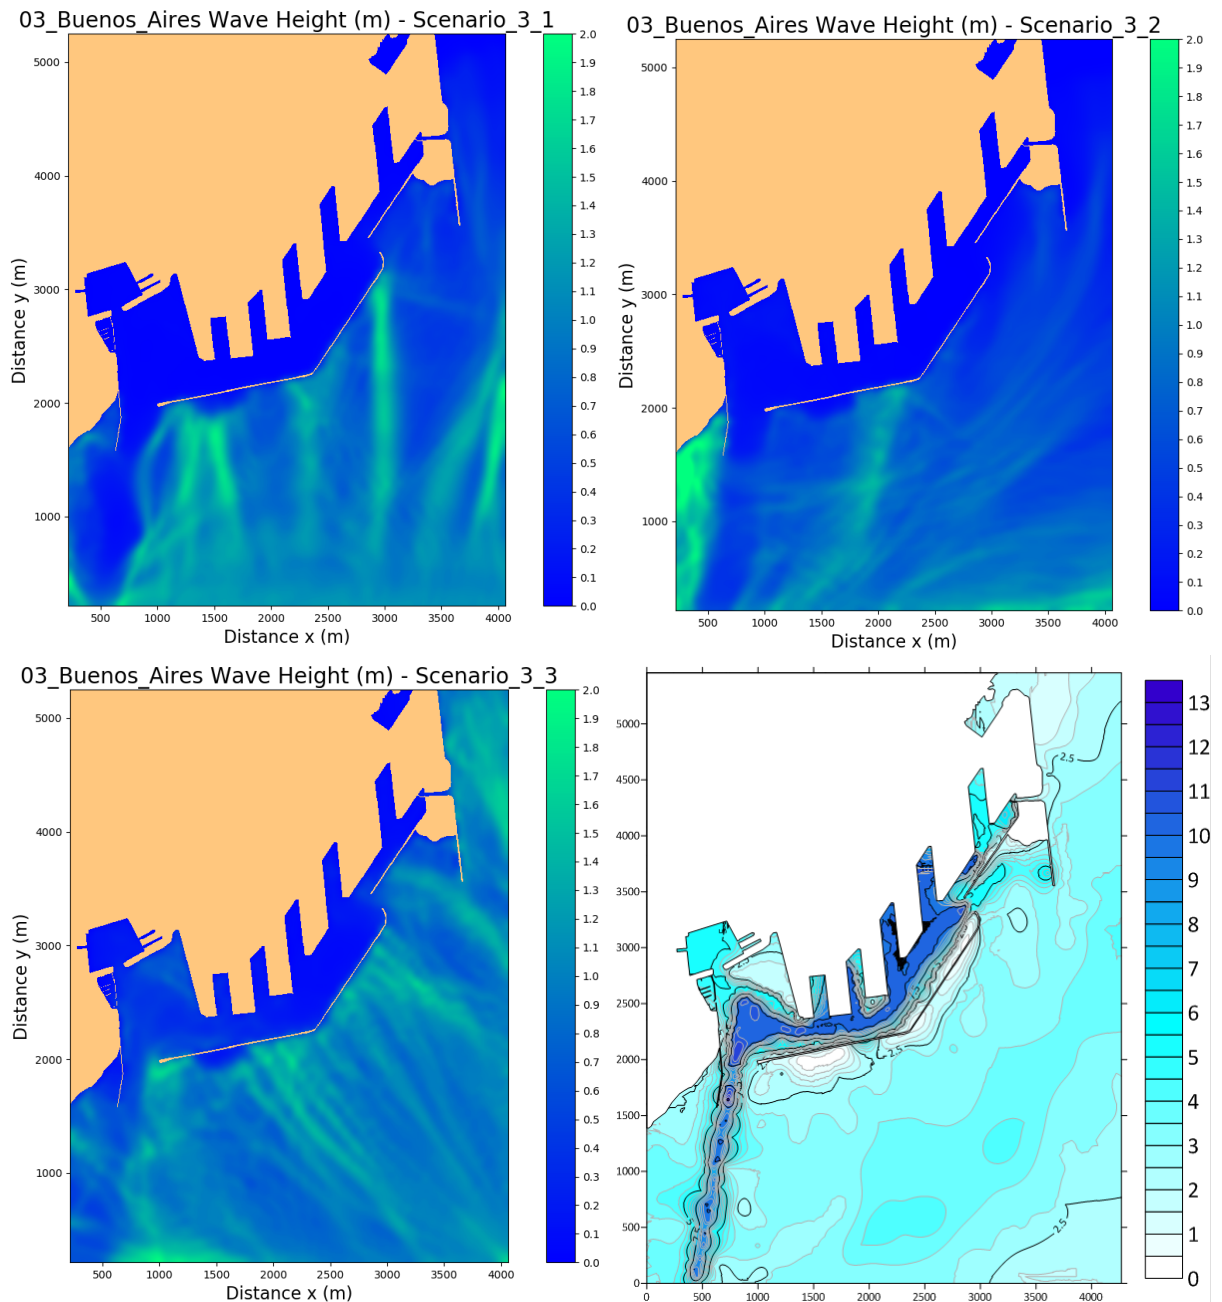

Figure S4.2. Characteristic operational WFS results of  $H_s$  (m) by Model B in **Buenos Aires** (Brazil; no. 3 of Table 1) port during E, SE, and NE sector incoming waves of  $H_s=1\text{m}$  (port orientation is turned 90° clockwise).



| Scenarios | $H_s$ (m) | $T_p$ (s) | $\phi_i$ (°) | $t_{sim}$ (s) |
|-----------|-----------|-----------|--------------|---------------|
| B#1 (2.1) | 1.00      | 8.00      | 270          | 800           |
| B#2 (2.2) | 1.00      | 8.00      | 315          | 800           |
| B#3 (2.3) | 1.00      | 8.00      | 0            | 800           |

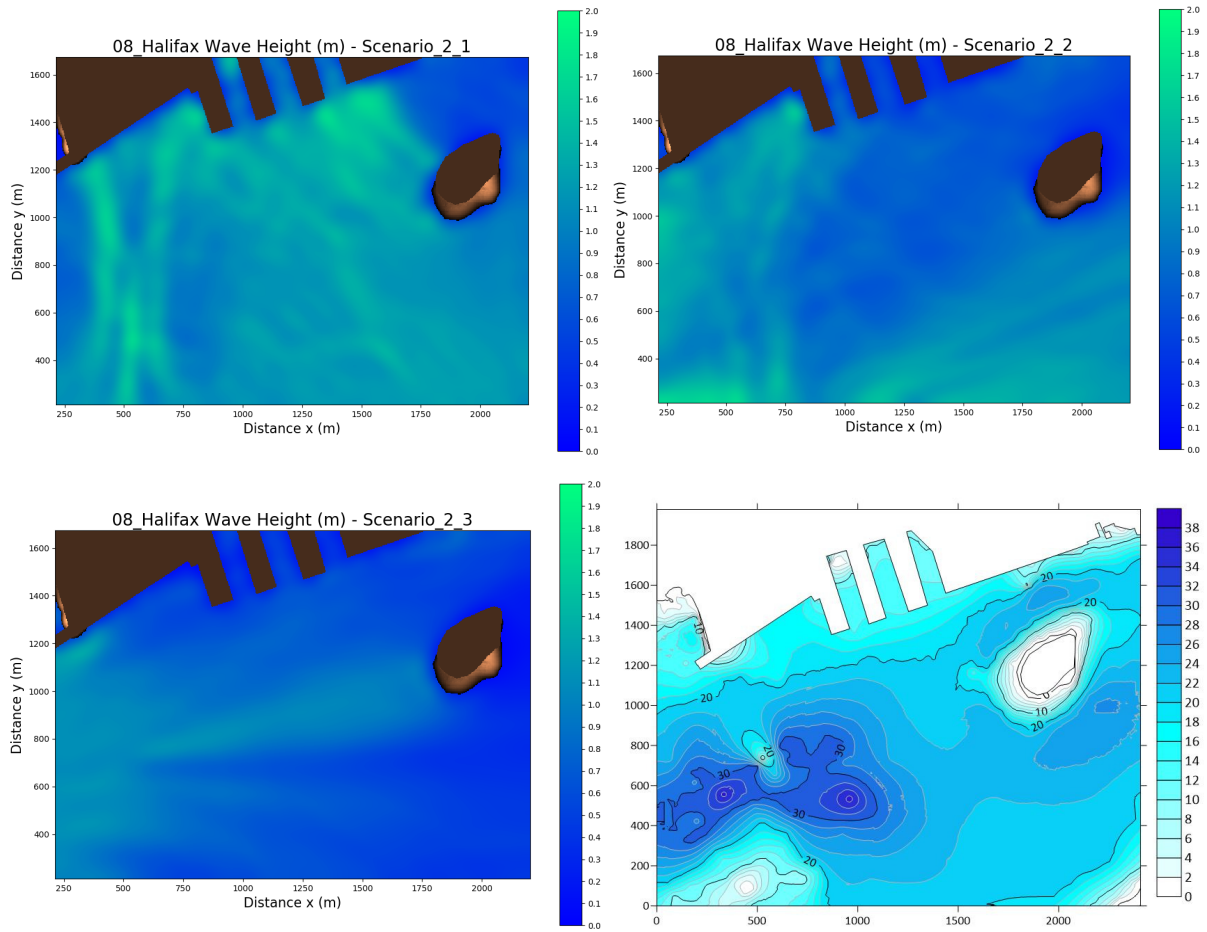

Figure S4.3. Characteristic operational WFS results of  $H_s$  (m) by Model B in **Halifax** (Canada; no. 8 of Table 1) port during E, SE, and S sector incoming waves of  $H_s=1$  m (port orientation is turned 90° clockwise).

| Scenarios | $H_s$ (m) | $T_p$ (s) | $\phi_i$ (°) | $t_{sim}$ (s) |
|-----------|-----------|-----------|--------------|---------------|
|-----------|-----------|-----------|--------------|---------------|

|                  |      |      |     |      |
|------------------|------|------|-----|------|
| <b>B#1 (3.1)</b> | 1.00 | 12.0 | 90  | 1300 |
| <b>B#2 (3.2)</b> | 1.00 | 12.0 | 135 | 1300 |
| <b>B#3 (3.3)</b> | 1.00 | 12.0 | 45  | 1300 |

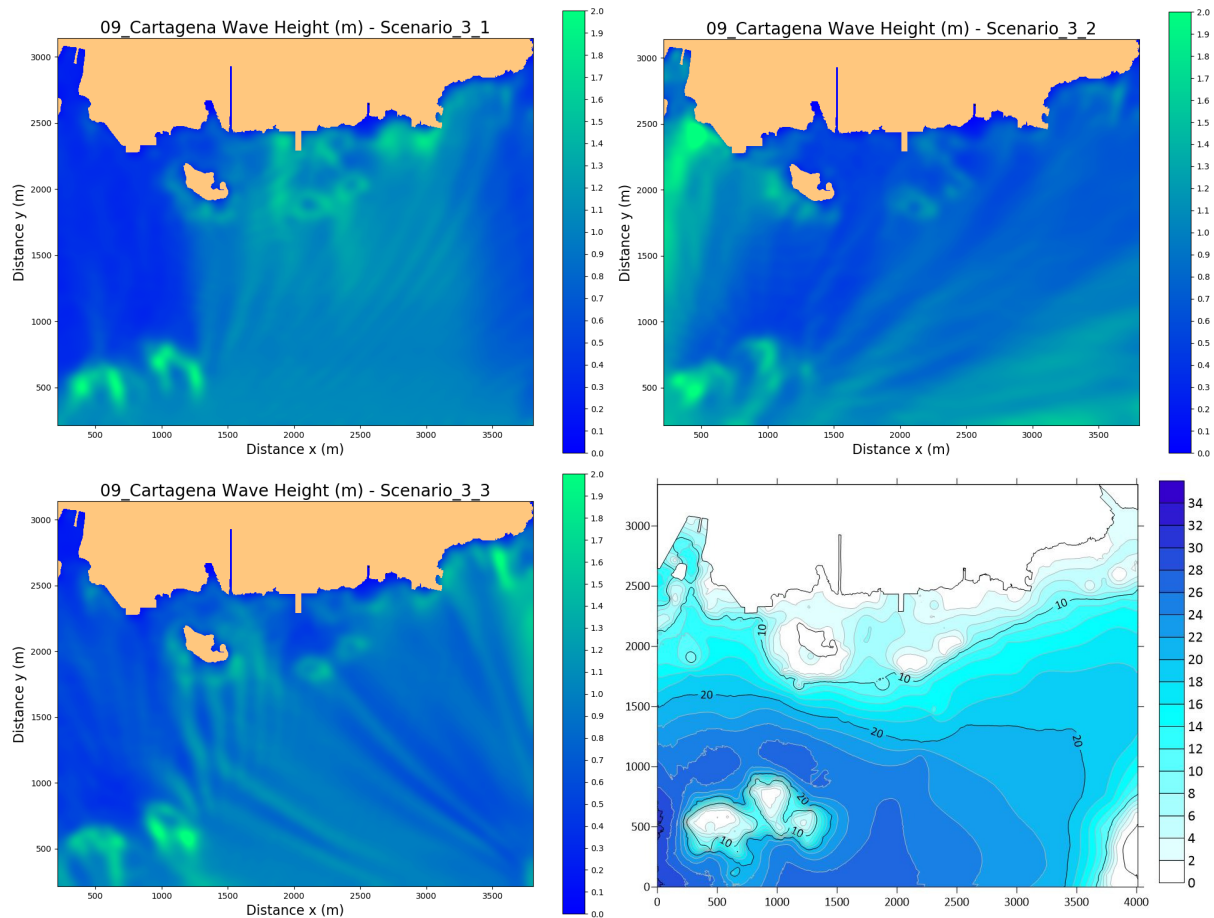

Figure S4.4. Characteristic operational WFS results of  $H_s$  (m) by Model B in **Cartagena** (Colombia; no. 9 of Table 1) port during W, NW, and SW sector incoming waves of  $H_s=1\text{m}$  (port orientation is turned  $90^\circ$  counter-clockwise).

| <b>Scenarios</b> | <b><math>H_s</math> (m)</b> | <b><math>T_p</math> (s)</b> | <b><math>\phi_i</math> (<math>^\circ</math>)</b> | <b><math>t_{sim}</math> (s)</b> |
|------------------|-----------------------------|-----------------------------|--------------------------------------------------|---------------------------------|
| <b>B#1 (2.1)</b> | 1.00                        | 8.00                        | 270                                              | 1200                            |

|                  |      |      |     |      |
|------------------|------|------|-----|------|
| <b>B#2 (2.2)</b> | 1.00 | 8.00 | 315 | 1200 |
| <b>B#3 (2.3)</b> | 1.00 | 8.00 | 0   | 1200 |

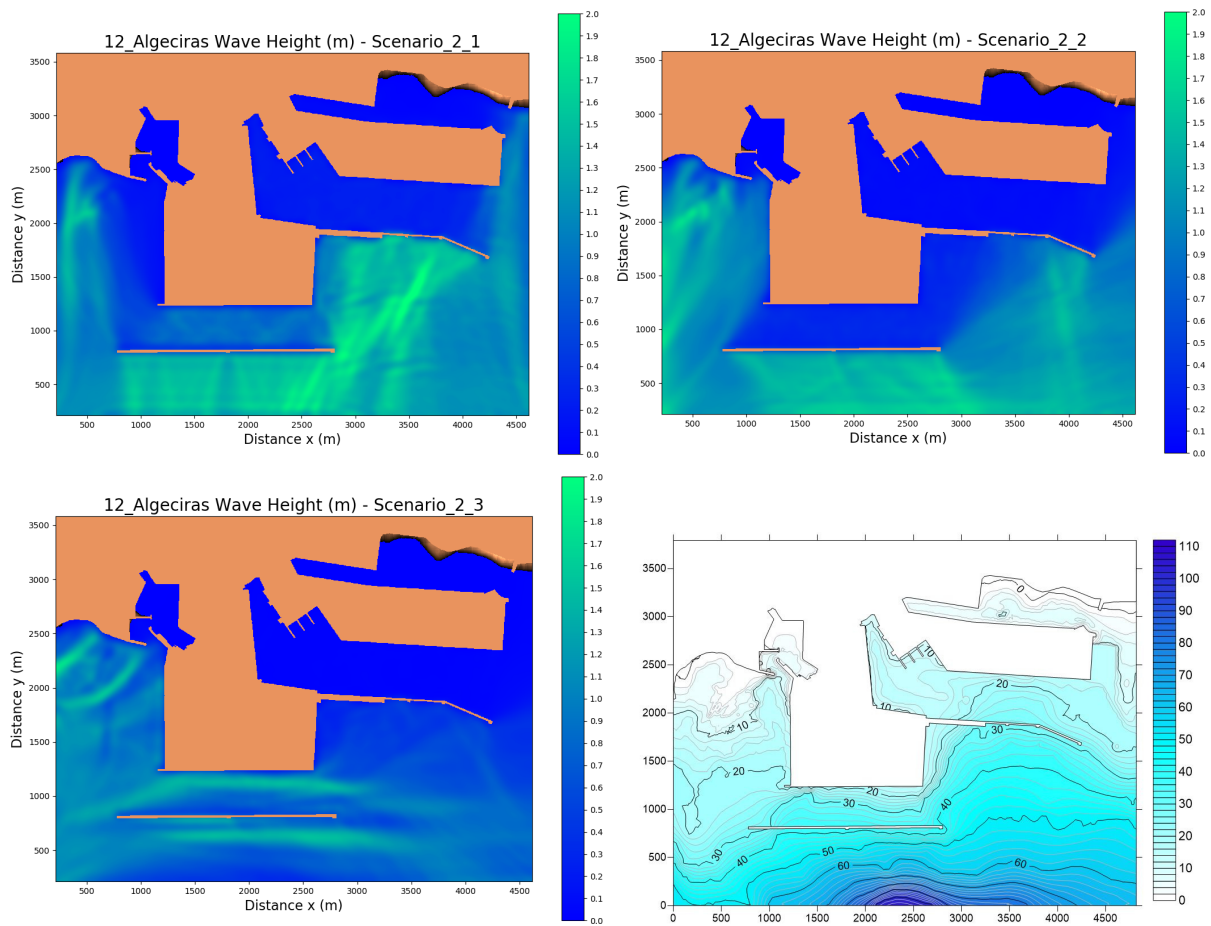

Figure S4.5. Characteristic operational WFS results of  $H_s$  (m) by Model B in **Algeciras** (Spain; no. 12 of Table 1) port during E, SE, and S sector incoming waves of  $H_s=1\text{m}$  (port orientation is turned  $90^\circ$  clockwise).

| Scenarios        | $H_s$ (m) | $T_p$ (s) | $\phi_i$ (°) | $t_{sim}$ (s) |
|------------------|-----------|-----------|--------------|---------------|
| <b>B#1 (3.1)</b> | 1.00      | 12.0      | 90           | 1200          |
| <b>B#2 (3.2)</b> | 1.00      | 12.0      | 135          | 1200          |
| <b>B#3 (3.3)</b> | 1.00      | 12.0      | 45           | 1200          |

14\_LeHavre Wave Height (m) - Scenario\_3\_1

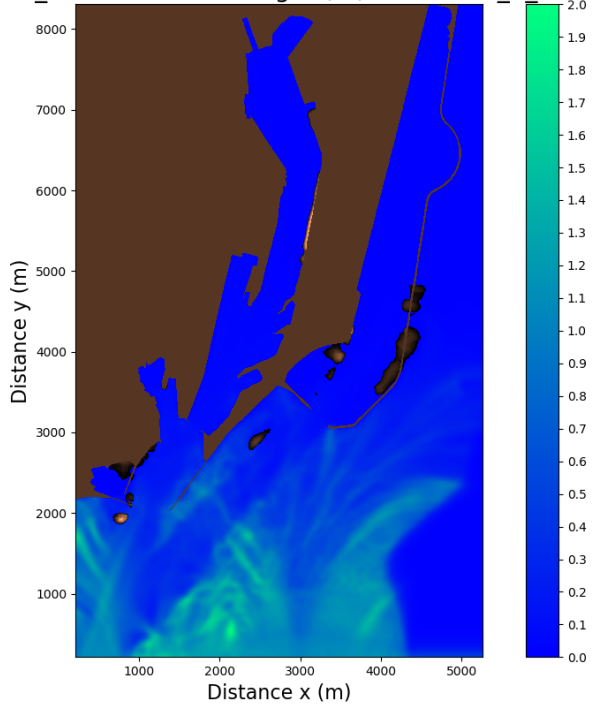

14\_LeHavre Wave Height (m) - Scenario\_3\_2

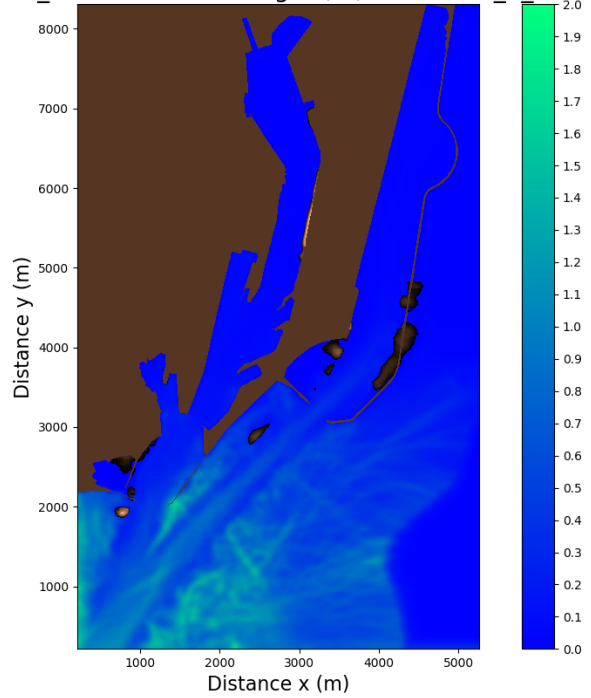

14\_LeHavre Wave Height (m) - Scenario\_3\_3

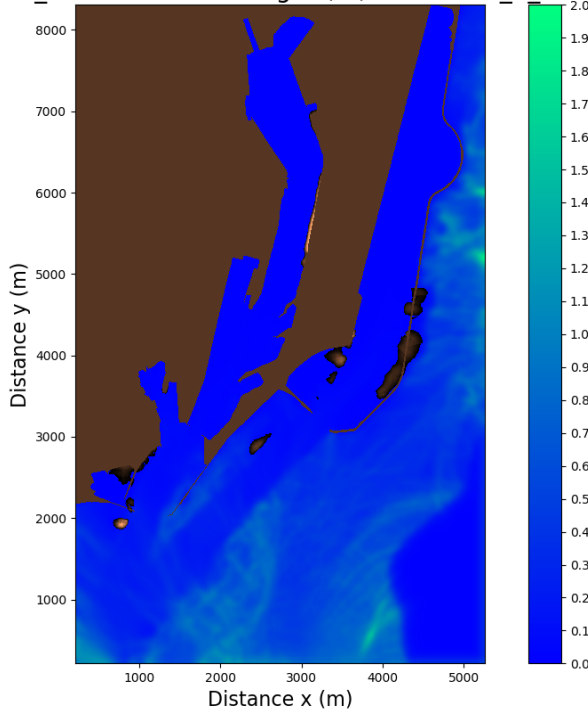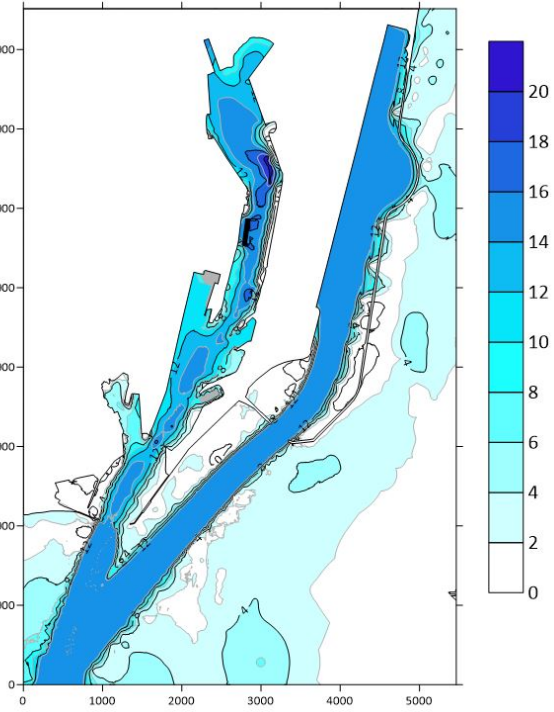

Figure S4.6. Characteristic operational WFS results of  $H_s$  (m) by Model B in **Le Havre** (France; no. 14 of Table 1) port during W, NW, and SW sector incoming waves of  $H_s=1\text{m}$  (port orientation  $90^\circ$  counter-clockwise).

| Scenarios        | $H_s$ (m) | $T_p$ (s) | $\phi_i$ ( $^\circ$ ) | $t_{sim}$ (s) |
|------------------|-----------|-----------|-----------------------|---------------|
| <b>B#1 (3.1)</b> | 1.00      | 12.0      | 90                    | 500           |
| <b>B#2 (3.2)</b> | 1.00      | 12.0      | 135                   | 500           |
| <b>B#3 (3.3)</b> | 1.00      | 12.0      | 45                    | 500           |



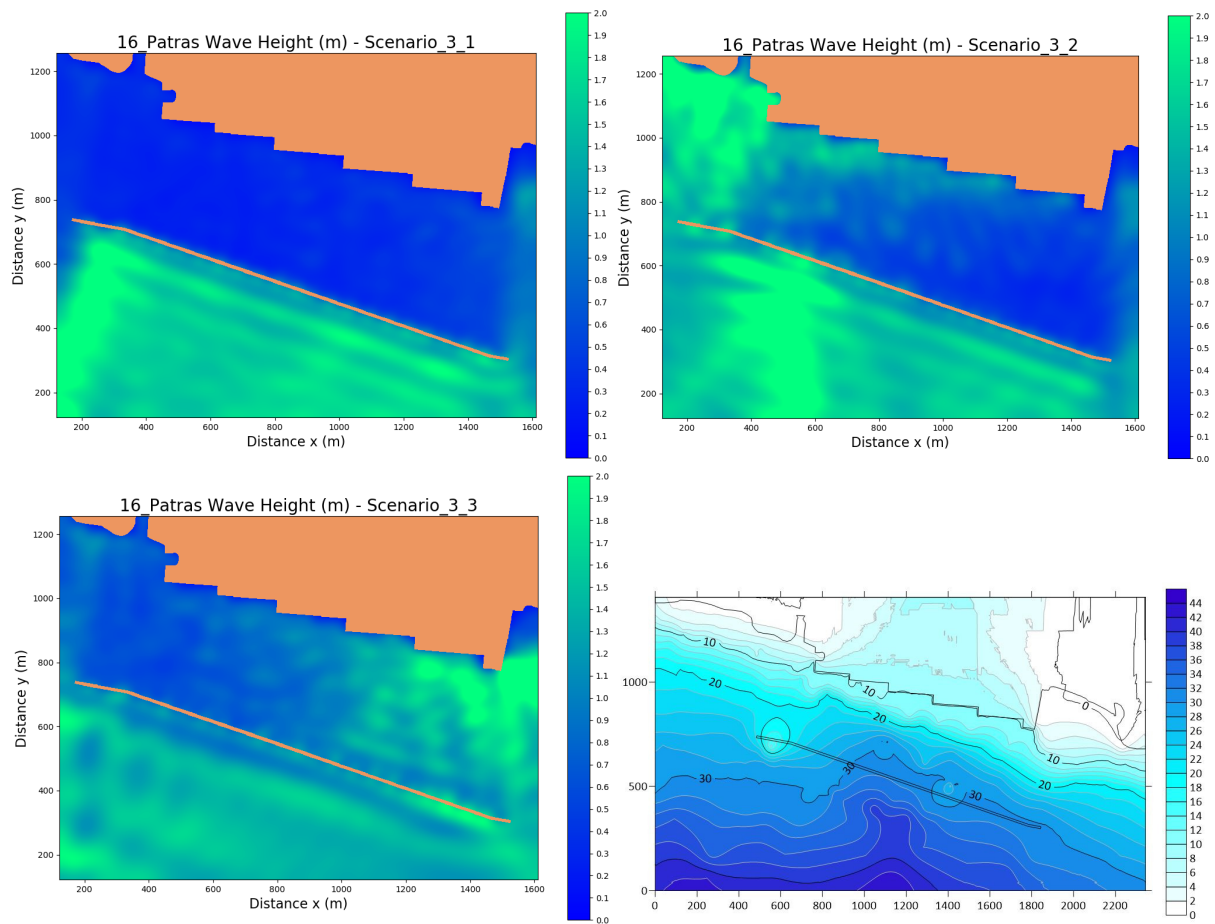

Figure S4.7. Characteristic operational WFS results of  $H_s$  (m) by Model B in **Patra** (Greece; no. 16 of Table 1) port during W, NW, and SW sector incoming waves of  $H_s=1\text{m}$  (port orientation is turned  $90^\circ$  counter-clockwise).

| Scenarios        | $H_s$ (m) | $T_p$ (s) | $\phi_i$ ( $^\circ$ ) | $t_{sim}$ (s) |
|------------------|-----------|-----------|-----------------------|---------------|
| <b>B#1 (2.1)</b> | 1.00      | 8.00      | 0                     | 1000          |
| <b>B#2 (2.2)</b> | 1.00      | 8.00      | 45                    | 1000          |
| <b>B#3 (2.3)</b> | 1.00      | 8.00      | 315                   | 1000          |

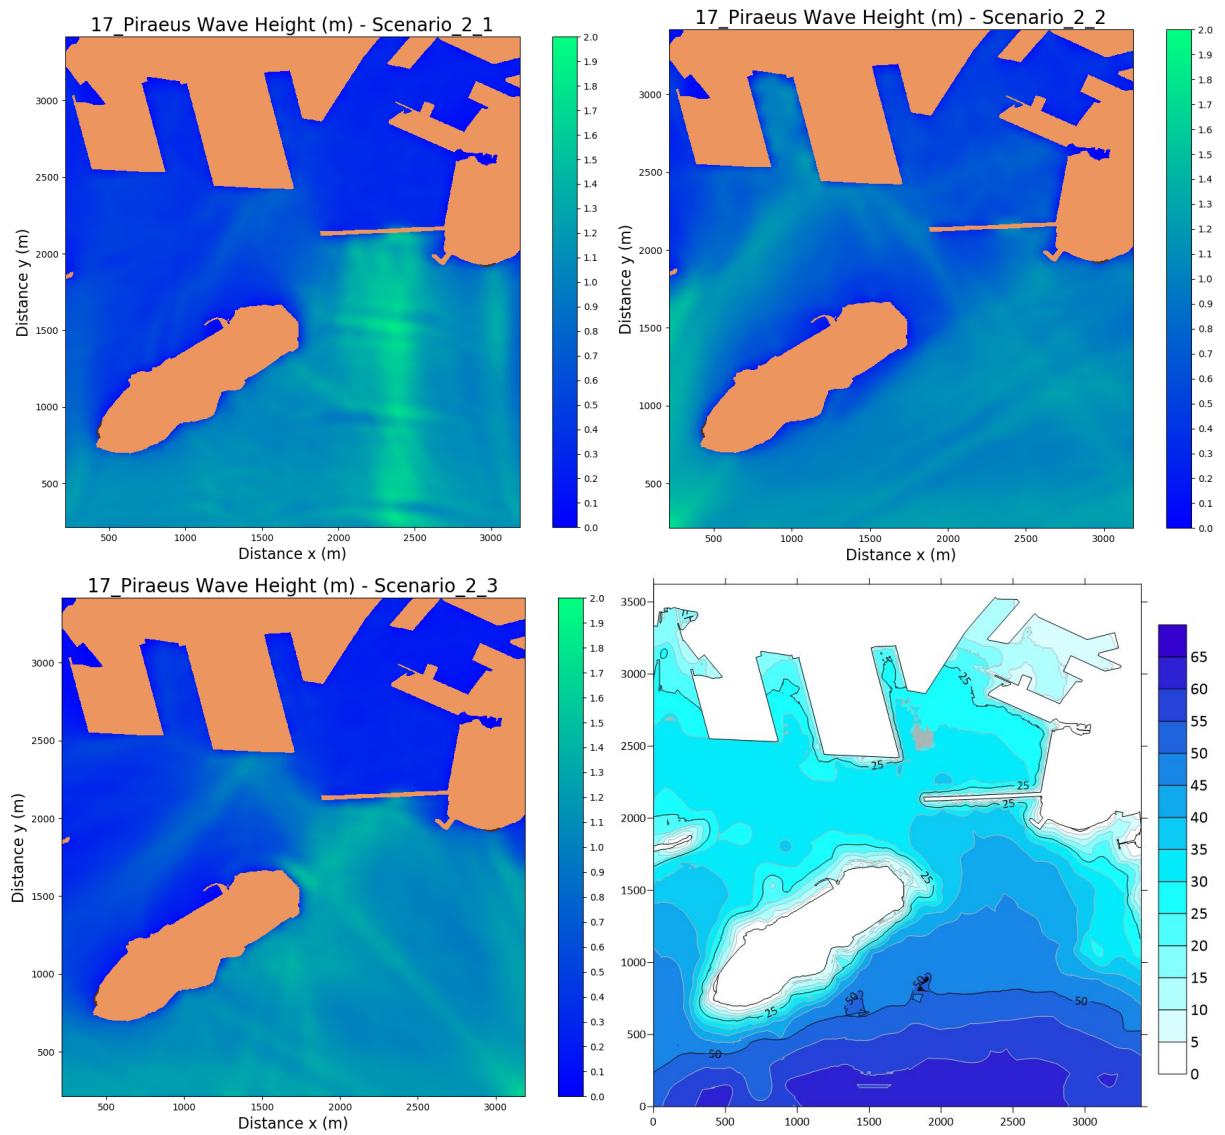

Figure S4.8. Characteristic operational WFS results of  $H_s$  (m) by Model B in **Piraeus** (Greece; no. 17 of Table 1) port during S, SW, and SE sector incoming waves of  $H_s=1\text{m}$ .

| Scenarios        | $H_s$ (m) | $T_p$ (s) | $\phi_i$ (°) | $t_{sim}$ (s) |
|------------------|-----------|-----------|--------------|---------------|
| <b>B#1 (2.1)</b> | 1.00      | 8.00      | 0            | 700           |
| <b>B#2 (2.2)</b> | 1.00      | 8.00      | 45           | 700           |
| <b>B#3 (2.3)</b> | 1.00      | 8.00      | 315          | 700           |

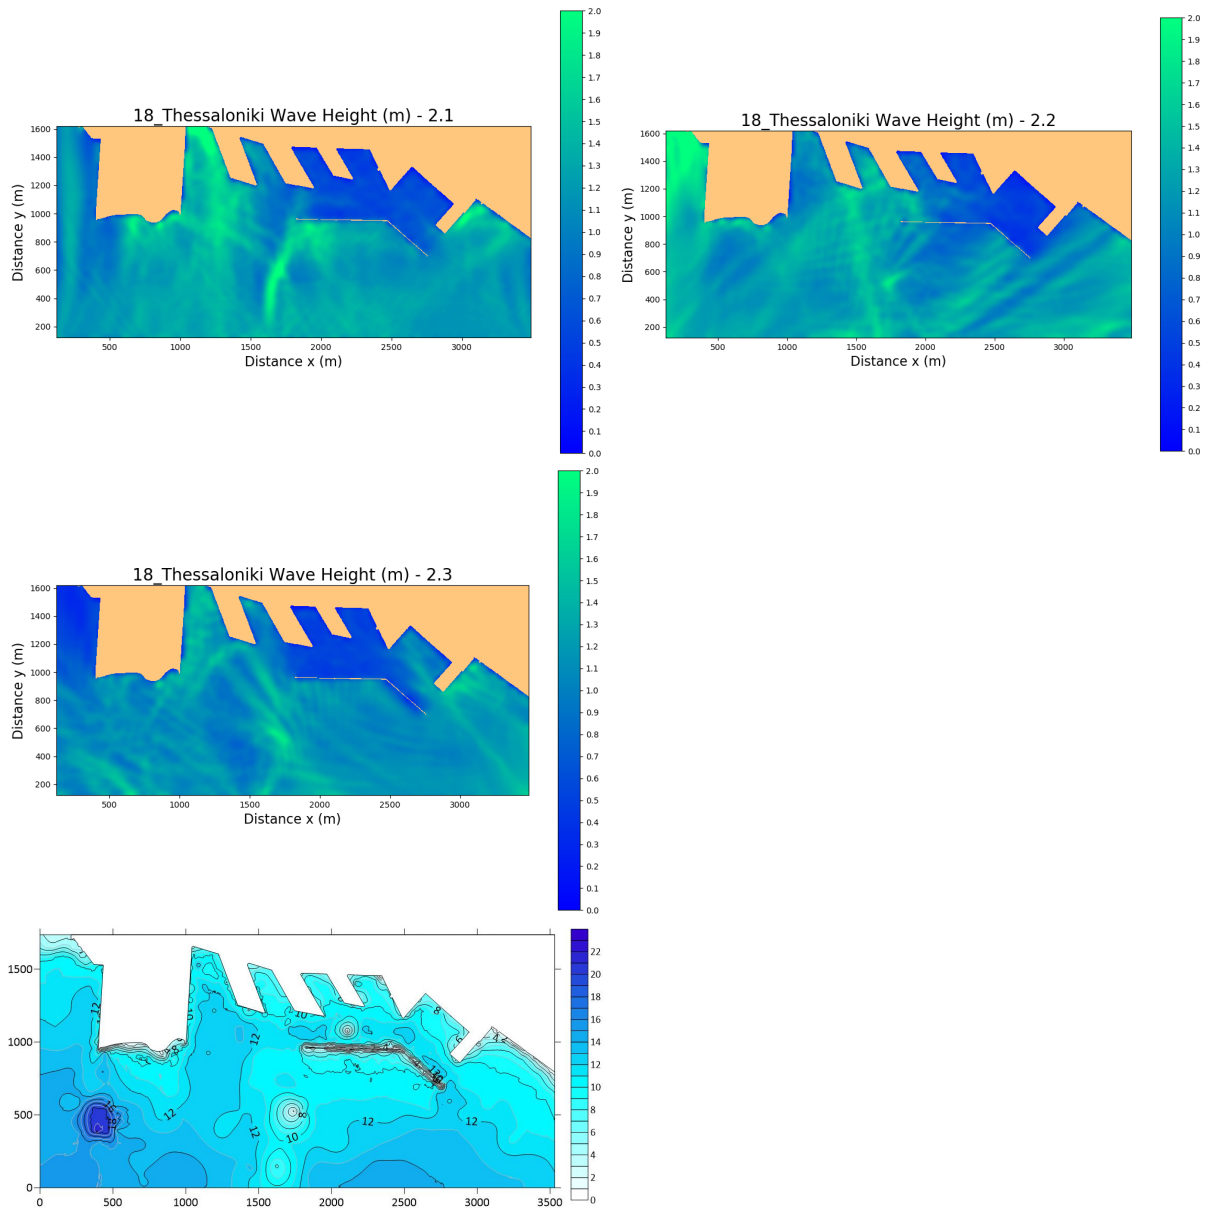

Figure S4.9. Characteristic operational WFS results of  $H_s$  (m) by Model B in **Thessaloniki** (Greece; no. 18 of Table 1) port during S, SW, and SE sector incoming waves of  $H_s=1\text{m}$ .

| Scenarios | $H_s$ (m) | $T_p$ (s) | $\phi_i$ (°) | $t_{sim}$ (s) |
|-----------|-----------|-----------|--------------|---------------|
| B#1 (2.1) | 1.00      | 8.00      | 270          | 1700          |
| B#2 (2.2) | 1.00      | 8.00      | 315          | 1700          |
| B#3 (3.1) | 1.00      | 12.0      | 270          | 1700          |

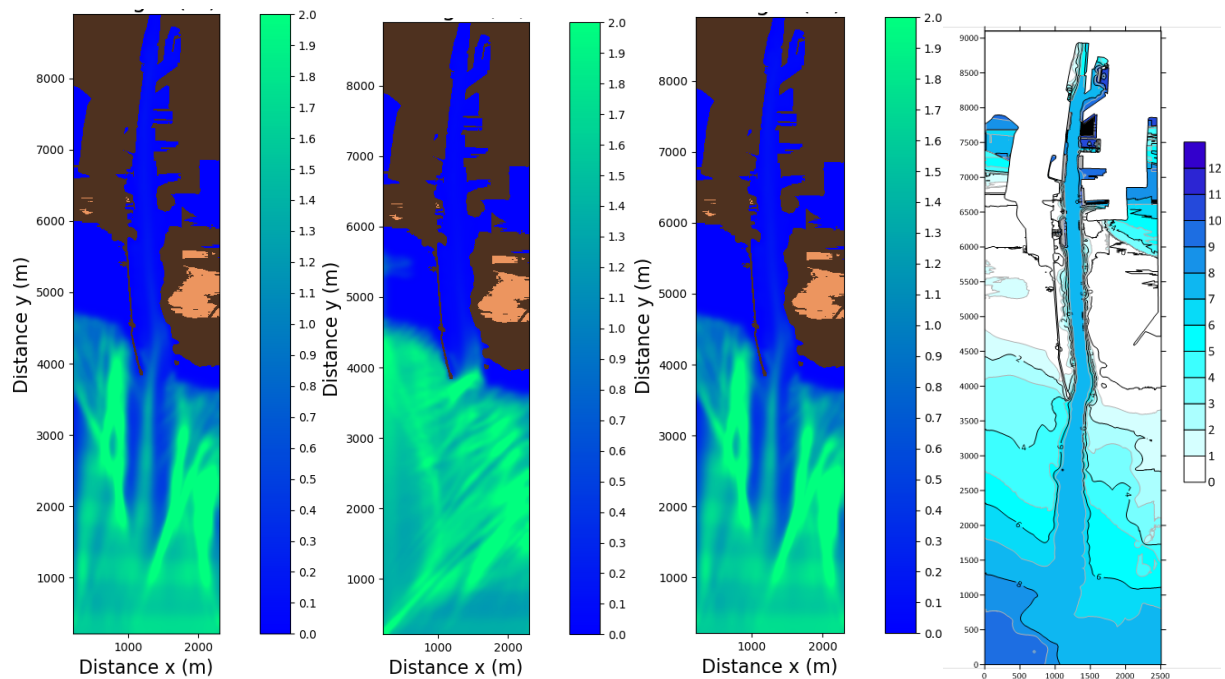

Figure S4.10. Characteristic operational WFS results of  $H_s$  (m) by Model B in **Dublin** (Ireland; no. 21 of Table 1) port during E and SE sector incoming wind waves and swell of  $H_s=1\text{m}$  (port orientation is turned 90° clockwise).

| Scenarios | $H_s$ (m) | $T_p$ (s) | $\phi_i$ (°) | $t_{sim}$ (s) |
|-----------|-----------|-----------|--------------|---------------|
|-----------|-----------|-----------|--------------|---------------|



|                  |      |      |     |      |
|------------------|------|------|-----|------|
|                  |      |      |     |      |
| <b>B#1 (2.1)</b> | 1.00 | 8.00 | 180 | 1400 |
| <b>B#2 (2.2)</b> | 1.00 | 8.00 | 225 | 1400 |
| <b>B#3 (2.3)</b> | 1.00 | 8.00 | 135 | 1400 |

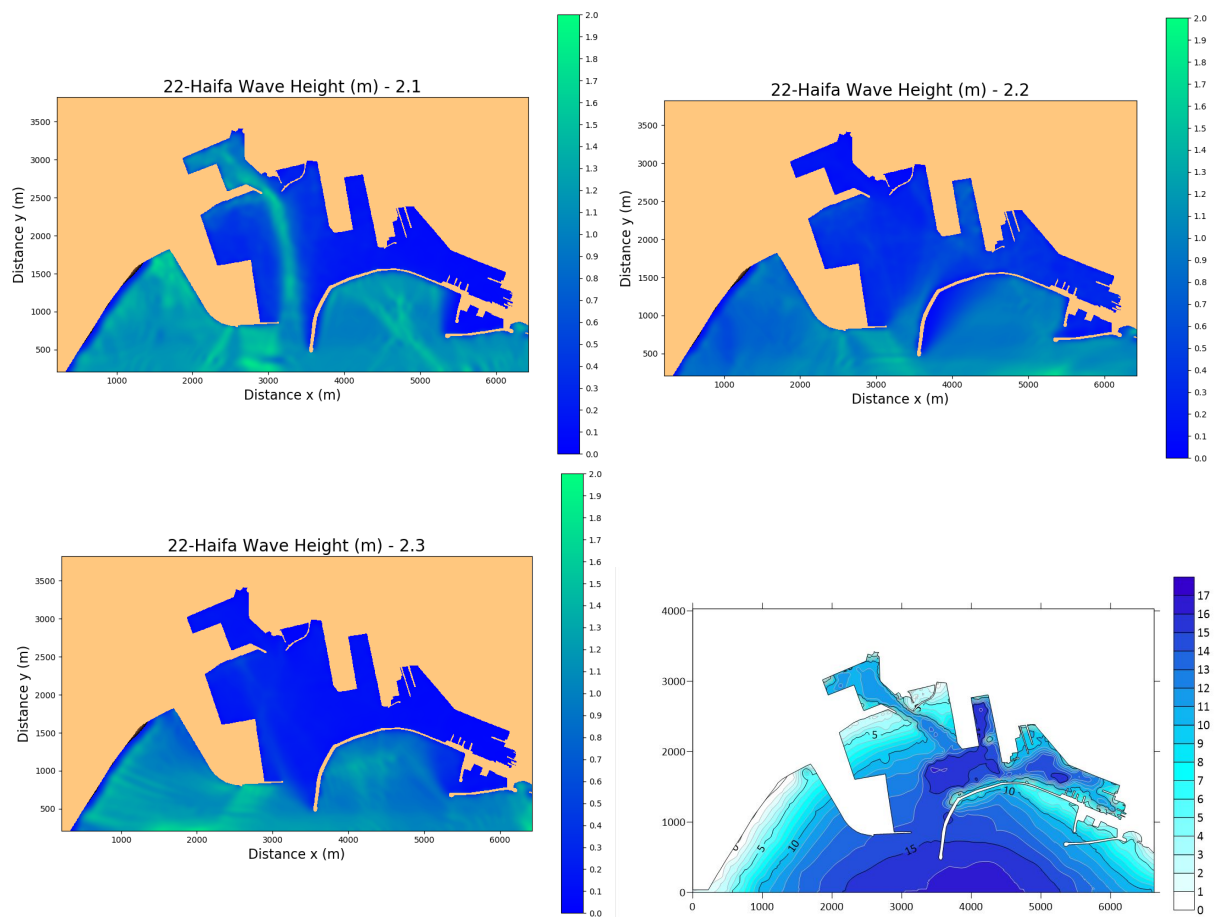

Figure S4.10. Characteristic operational WFS results of  $H_s$  (m) by Model B in Haifa (Israel; no. 22 of Table 1) port during N, NE and NW sector incoming wind waves and swell of  $H_s=1\text{m}$  (port orientation is turned  $180^\circ$  clockwise).

| Scenarios | $H_s$ (m) | $T_p$ (s) | $\phi_i$ ( $^\circ$ ) | $t_{sim}$ (s) |
|-----------|-----------|-----------|-----------------------|---------------|
|-----------|-----------|-----------|-----------------------|---------------|

|                  |      |      |    |      |
|------------------|------|------|----|------|
| <b>B#1 (2.1)</b> | 1.00 | 8.00 | 0  | 1000 |
| <b>B#2 (2.2)</b> | 1.00 | 8.00 | 45 | 1000 |
| <b>B#3 (3.1)</b> | 1.00 | 12.0 | 0  | 1000 |

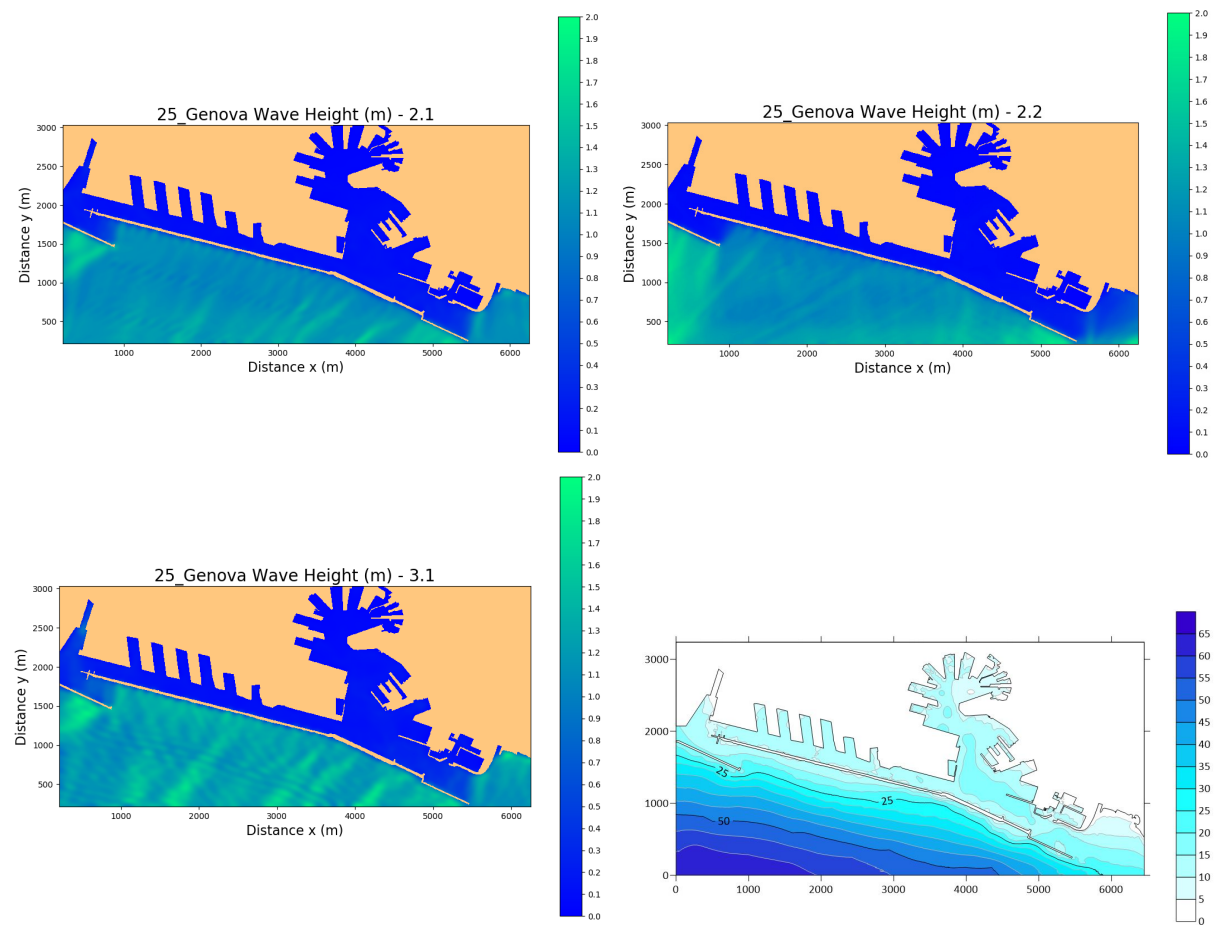

Figure S4.11. Characteristic operational WFS results of  $H_s$  (m) by Model B in **Genova** (Italy; no. 25 of Table 1) port during S and SW sector incoming wind waves and swell of  $H_s=1\text{m}$ .

| <b>Scenarios</b> | <b><math>H_s</math> (m)</b> | <b><math>T_p</math> (s)</b> | <b><math>\phi_i</math> (°)</b> | <b><math>t_{sim}</math> (s)</b> |
|------------------|-----------------------------|-----------------------------|--------------------------------|---------------------------------|
| <b>B#4 (3.1)</b> | 1.00                        | 12.0                        | 0                              | 1500                            |

|                  |      |      |    |      |
|------------------|------|------|----|------|
| <b>B#5 (3.2)</b> | 1.00 | 12.0 | 45 | 1500 |
| <b>B#6 (3.3)</b> | 1.00 | 12.0 | 90 | 1500 |

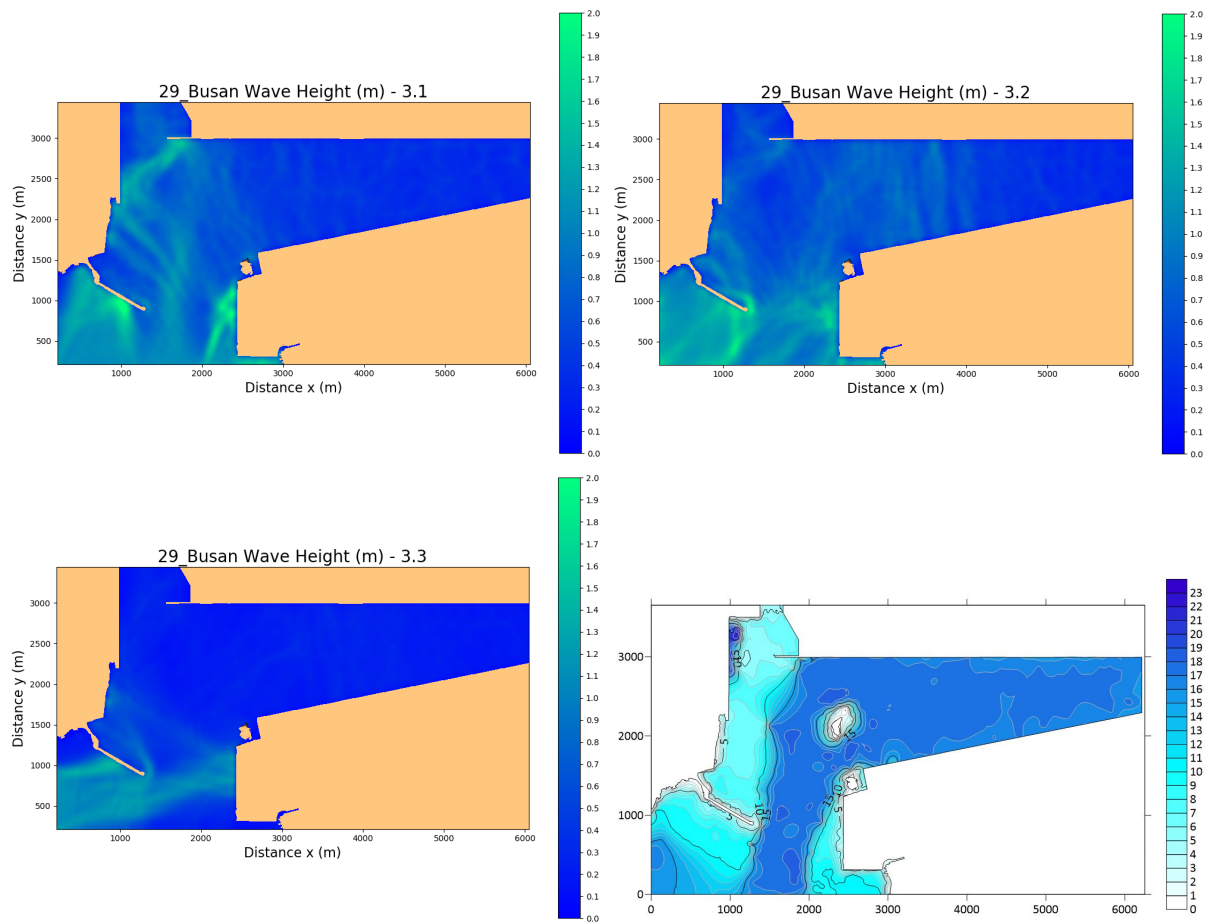

Figure S4.12. Characteristic operational WFS results of  $H_s$  (m) by Model B in **Busan** (South Korea; no. 29 of Table 1) new port during S and SW sector incoming wind waves and swell of  $H_s=1$  m.

| Scenarios        | $H_s$ (m) | $T_p$ (s) | $\phi_i$ (°) | $t_{sim}$ (s) |
|------------------|-----------|-----------|--------------|---------------|
| <b>B#1 (3.1)</b> | 1.00      | 12.0      | 180          | 1100          |
| <b>B#2 (3.2)</b> | 1.00      | 12.0      | 135          | 1100          |

|                  |             |             |           |             |
|------------------|-------------|-------------|-----------|-------------|
| <b>B#3 (3.3)</b> | <b>1.00</b> | <b>12.0</b> | <b>90</b> | <b>1100</b> |
|------------------|-------------|-------------|-----------|-------------|

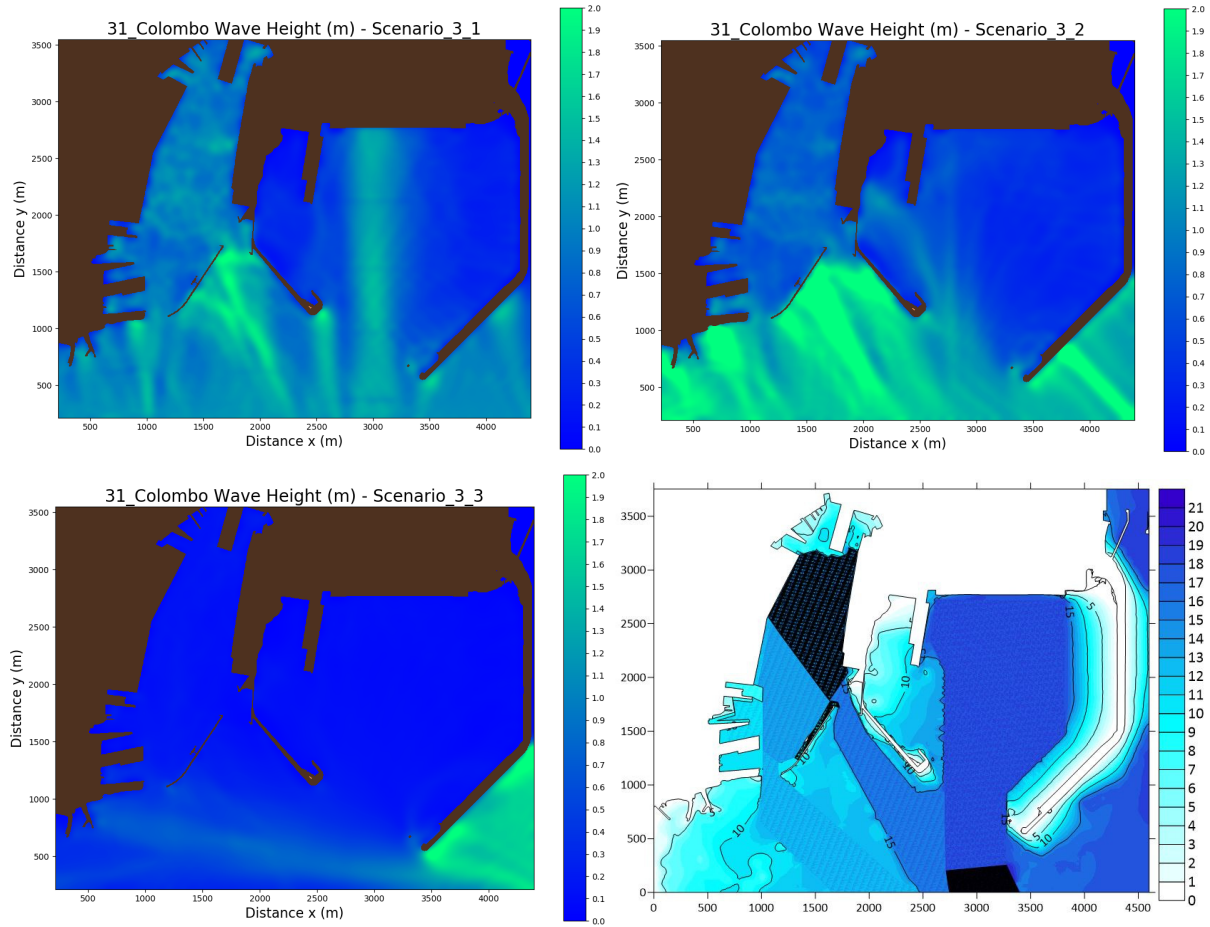

Figure S4.13. Characteristic operational WFS results of  $H_s$  (m) by Model B in **Colombo** (Sri Lanka; no. 31 of Table 1) port during N, NW, and W sector incoming wind waves and swell of  $H_s=1\text{m}$  (port orientation is turned  $90^\circ$  clockwise).

| Scenarios        | $H_s$ (m) | $T_p$ (s) | $\phi_i$ (°) | $t_{sim}$ (s) |
|------------------|-----------|-----------|--------------|---------------|
| <b>B#1 (2.1)</b> | 1.00      | 8.00      | 180          | 600           |
| <b>B#2 (2.2)</b> | 1.00      | 8.00      | 135          | 600           |
| <b>B#3 (2.3)</b> | 1.00      | 8.00      | 90           | 600           |



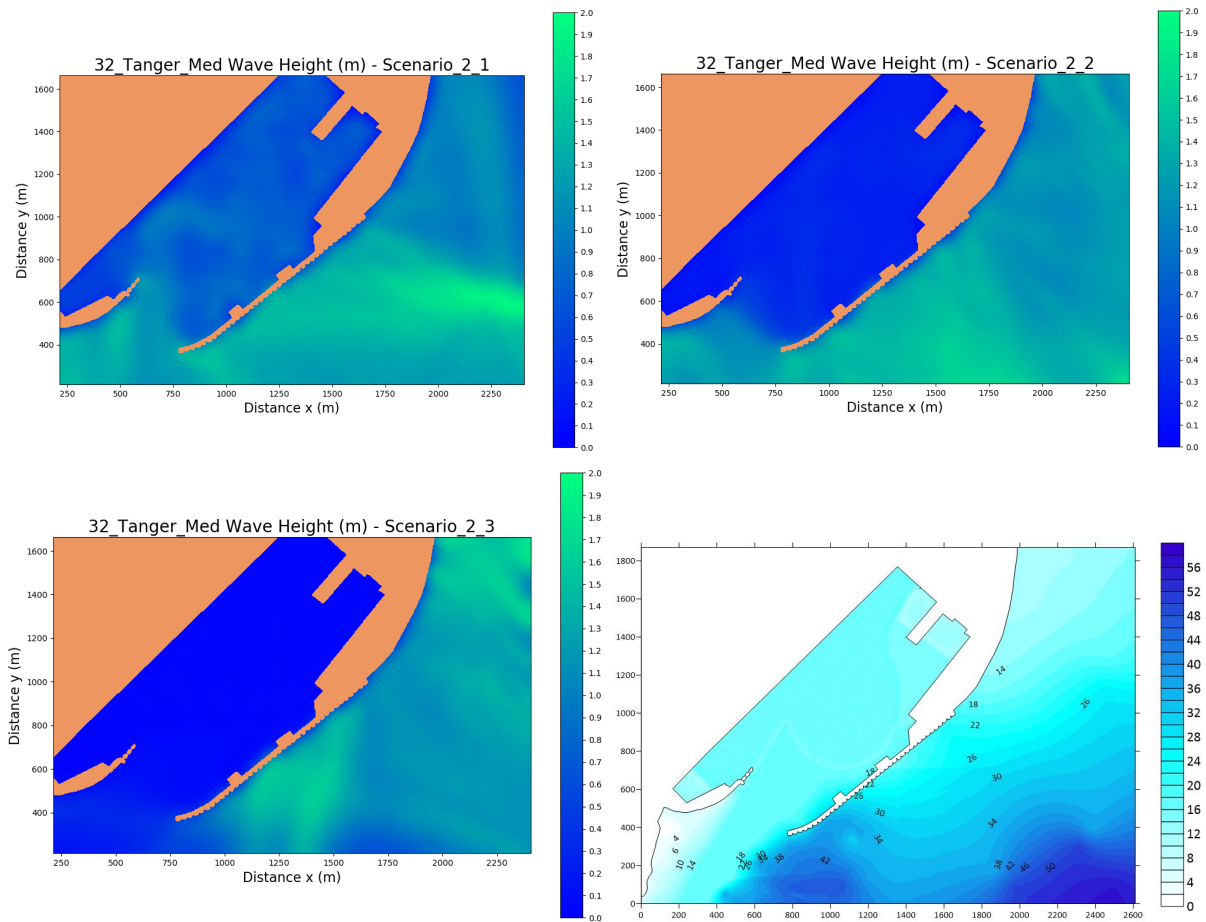

Figure S4.14. Characteristic operational WFS results of  $H_s$  (m) by Model B in **Tanger Med** (Morocco; no. 32 of Table 1) port during W, NW, and N sector incoming waves of  $H_s=1\text{m}$  (port orientation is turned  $180^\circ$  clockwise).

| Scenarios        | $H_s$ (m) | $T_p$ (s) | $\phi_i$ ( $^\circ$ ) | $t_{sim}$ (s) |
|------------------|-----------|-----------|-----------------------|---------------|
| <b>B#1 (2.1)</b> | 1.00      | 8.00      | 90                    | 1100          |
| <b>B#2 (2.2)</b> | 1.00      | 8.00      | 135                   | 1100          |
| <b>B#3 (2.3)</b> | 1.00      | 8.00      | 180                   | 1100          |

35\_Ijmuiden Wave Height (m) - Scenario 2\_1

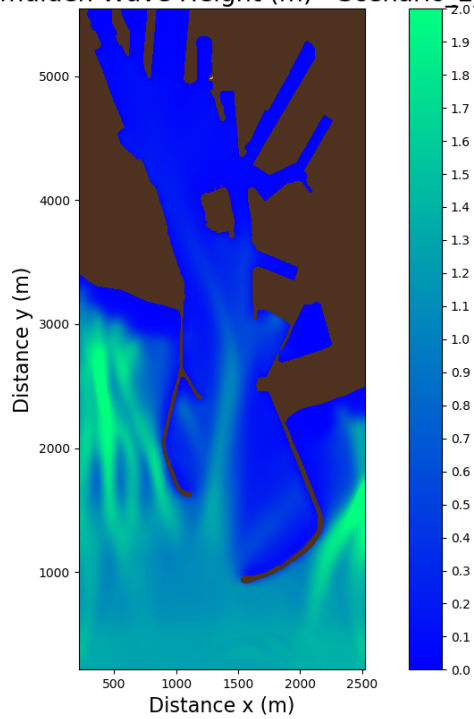

35\_Ijmuiden Wave Height (m) - Scenario 2\_2

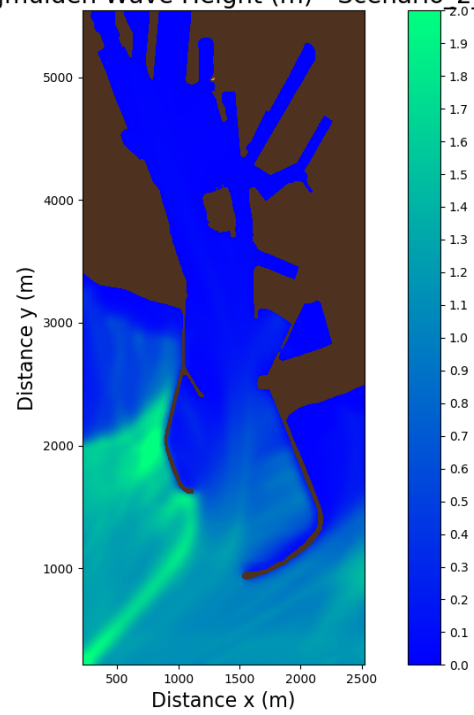

35\_Ijmuiden Wave Height (m) - Scenario 2\_3

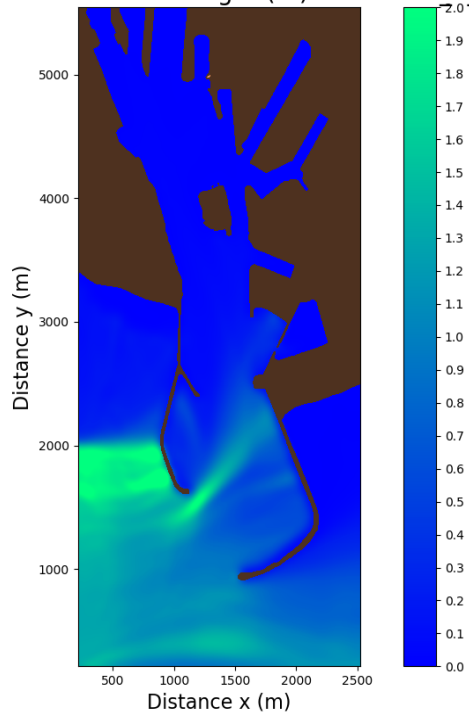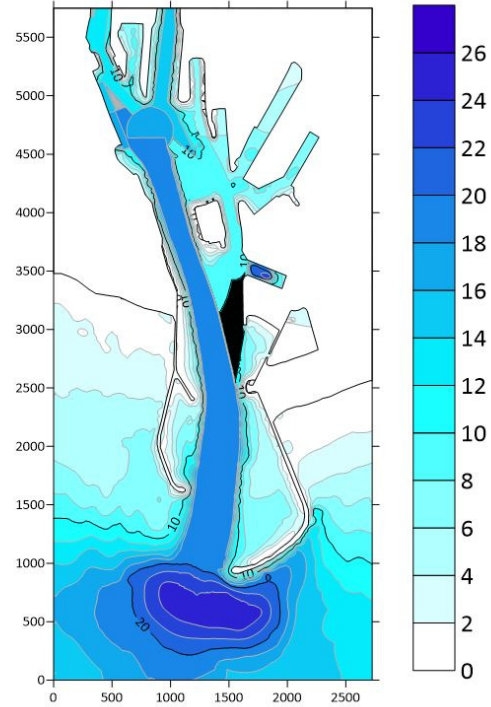

Figure S4.15. Characteristic operational WFS results of  $H_s$  (m) by Model B in **Ijmuiden** (Netherlands; no. 35 of Table 1) port during W, NW, and N sector incoming waves of  $H_s=1\text{m}$  (port orientation is turned 180° clockwise).

| Scenarios        | $H_s$ (m) | $T_p$ (s) | $\phi_i$ (°) | $t_{\text{sim}}$ (s) |
|------------------|-----------|-----------|--------------|----------------------|
| <b>B#1 (3.1)</b> | 1.00      | 12.0      | 90           | 800                  |
| <b>B#2 (3.2)</b> | 1.00      | 12.0      | 135          | 800                  |
| <b>B#3 (3.3)</b> | 1.00      | 12.0      | 45           | 800                  |

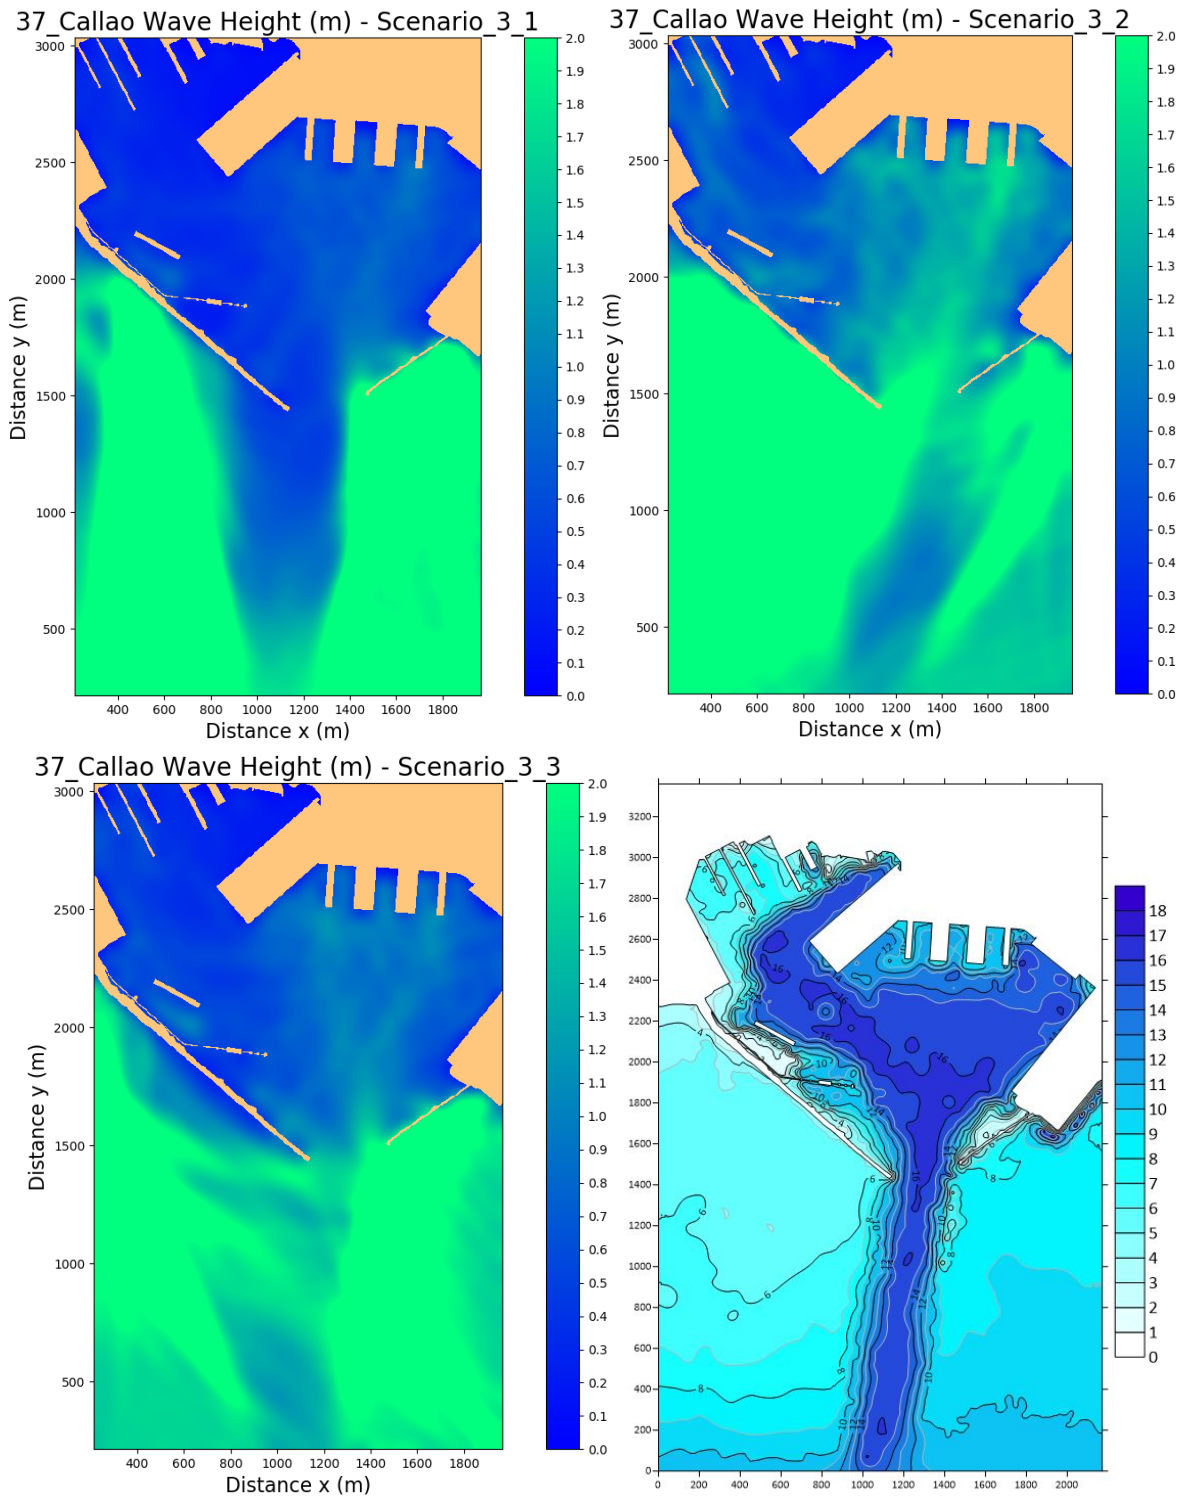

Figure S4.16. Characteristic operational WFS results of  $H_s$  (m) by Model B in **Callao** (Peru; no. 37 of Table 1) port during W, NW, and SW sector incoming waves of  $H_s=1\text{m}$  (port orientation is turned  $90^\circ$  counter-clockwise).

| Scenarios        | $H_s$ (m) | $T_p$ (s) | $\phi_i$ ( $^\circ$ ) | $t_{sim}$ (s) |
|------------------|-----------|-----------|-----------------------|---------------|
| <b>B#1 (2.1)</b> | 1.00      | 8.00      | 0                     | 1100          |
| <b>B#2 (2.2)</b> | 1.00      | 8.00      | 45                    | 1100          |
| <b>B#3 (2.3)</b> | 1.00      | 8.00      | 315                   | 1100          |

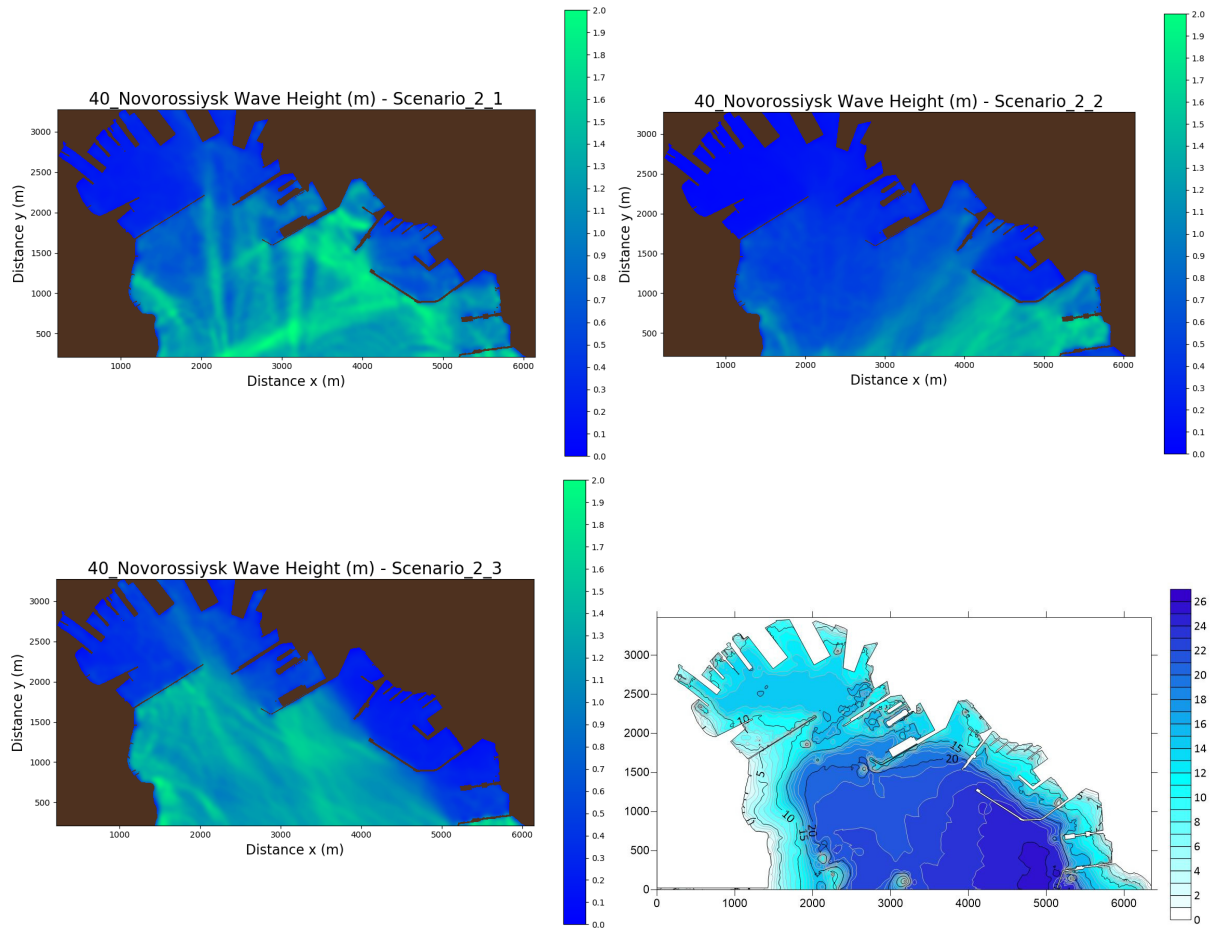

Figure S4.17. Characteristic operational WFS results of  $H_s$  (m) by Model B in **Novorossiysk** (Russia; no. 40 of Table 1) port during S, SW, and SE sector incoming waves of  $H_s=1\text{m}$ .

| Scenarios        | $H_s$ (m) | $T_p$ (s) | $\phi_i$ (°) | $t_{\text{sim}}$ (s) |
|------------------|-----------|-----------|--------------|----------------------|
| <b>B#1 (2.1)</b> | 1.00      | 8.00      | 90           | 1400                 |
| <b>B#2 (2.2)</b> | 1.00      | 8.00      | 135          | 1400                 |
| <b>B#3 (2.3)</b> | 1.00      | 8.00      | 45           | 1400                 |



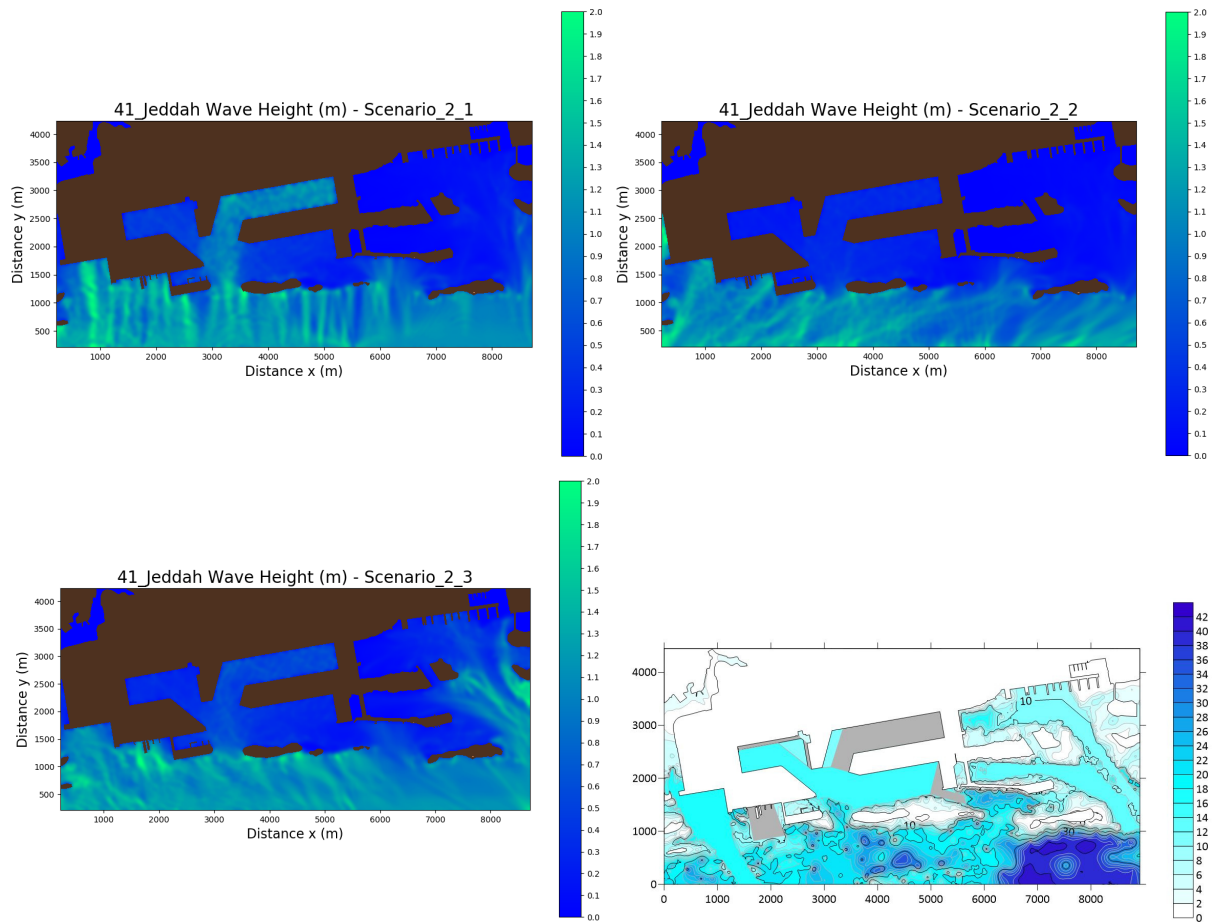

Figure S4.18. Characteristic operational WFS results of  $H_s$  (m) by Model B in **Jeddah** (Saudi Arabia; no. 41 of Table 1) port during S, SW, and SE sector incoming waves of  $H_s=1\text{m}$  (port orientation is turned  $90^\circ$  counter-clockwise).

| Scenarios        | $H_s$ (m) | $T_p$ (s) | $\phi_i$ ( $^\circ$ ) | $t_{sim}$ (s) |
|------------------|-----------|-----------|-----------------------|---------------|
| <b>B#1 (2.1)</b> | 1.00      | 8.00      | 0                     | 700           |
| <b>B#2 (2.2)</b> | 1.00      | 8.00      | 45                    | 700           |
| <b>B#3 (2.3)</b> | 1.00      | 8.00      | 315                   | 700           |

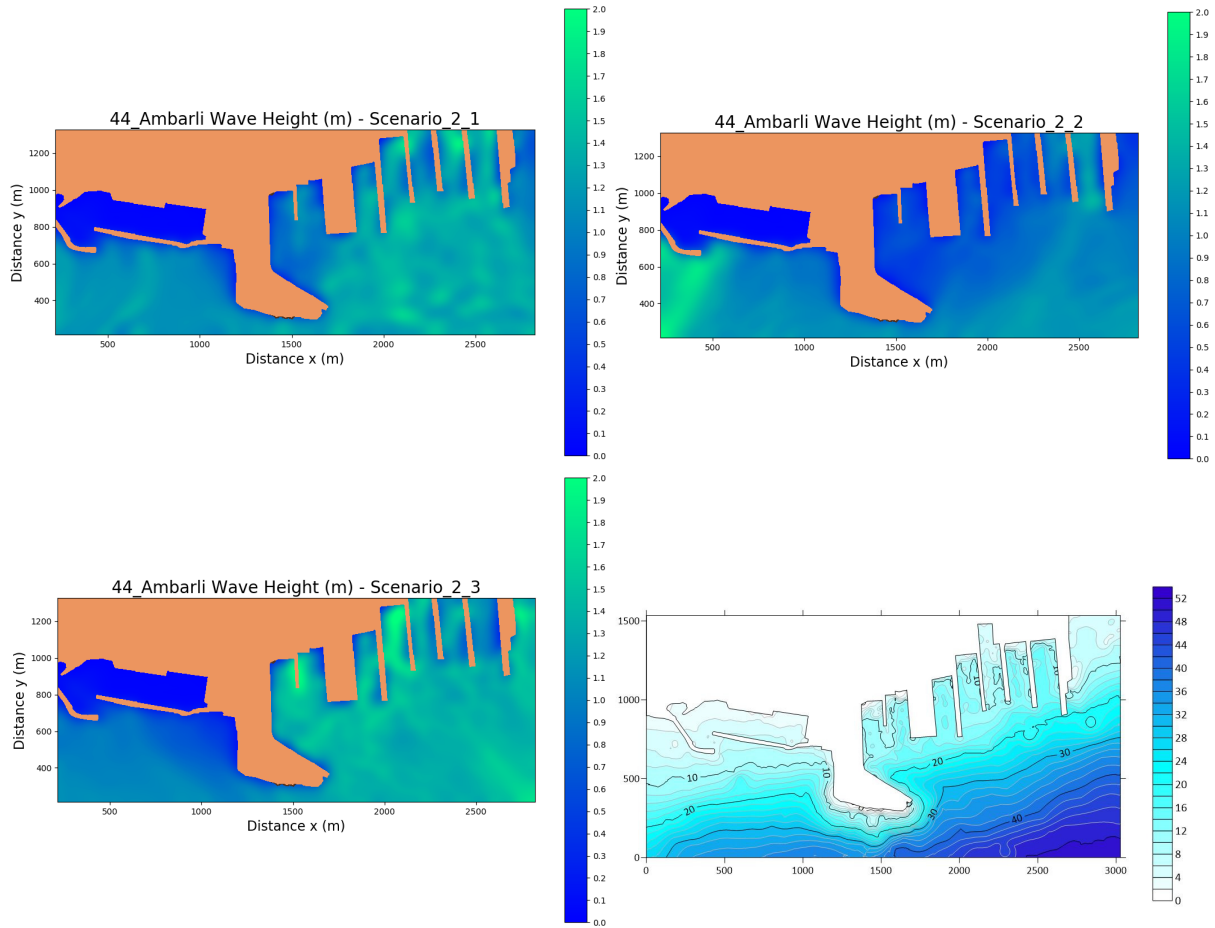

Figure S4.19. Characteristic operational WFS results of  $H_s$  (m) by Model B in **Ambarli** (Turkey; no. 44 of Table 1) port during S, SW, and SE sector incoming waves of  $H_s=1\text{m}$ .

| Scenarios        | $H_s$ (m) | $T_p$ (s) | $\phi_i$ (°) | $t_{sim}$ (s) |
|------------------|-----------|-----------|--------------|---------------|
| <b>B#1 (3.1)</b> | 1.00      | 12.0      | 180          | 900           |
| <b>B#2 (3.2)</b> | 1.00      | 12.0      | 225          | 900           |
| <b>B#3 (3.3)</b> | 1.00      | 12.0      | 135          | 900           |

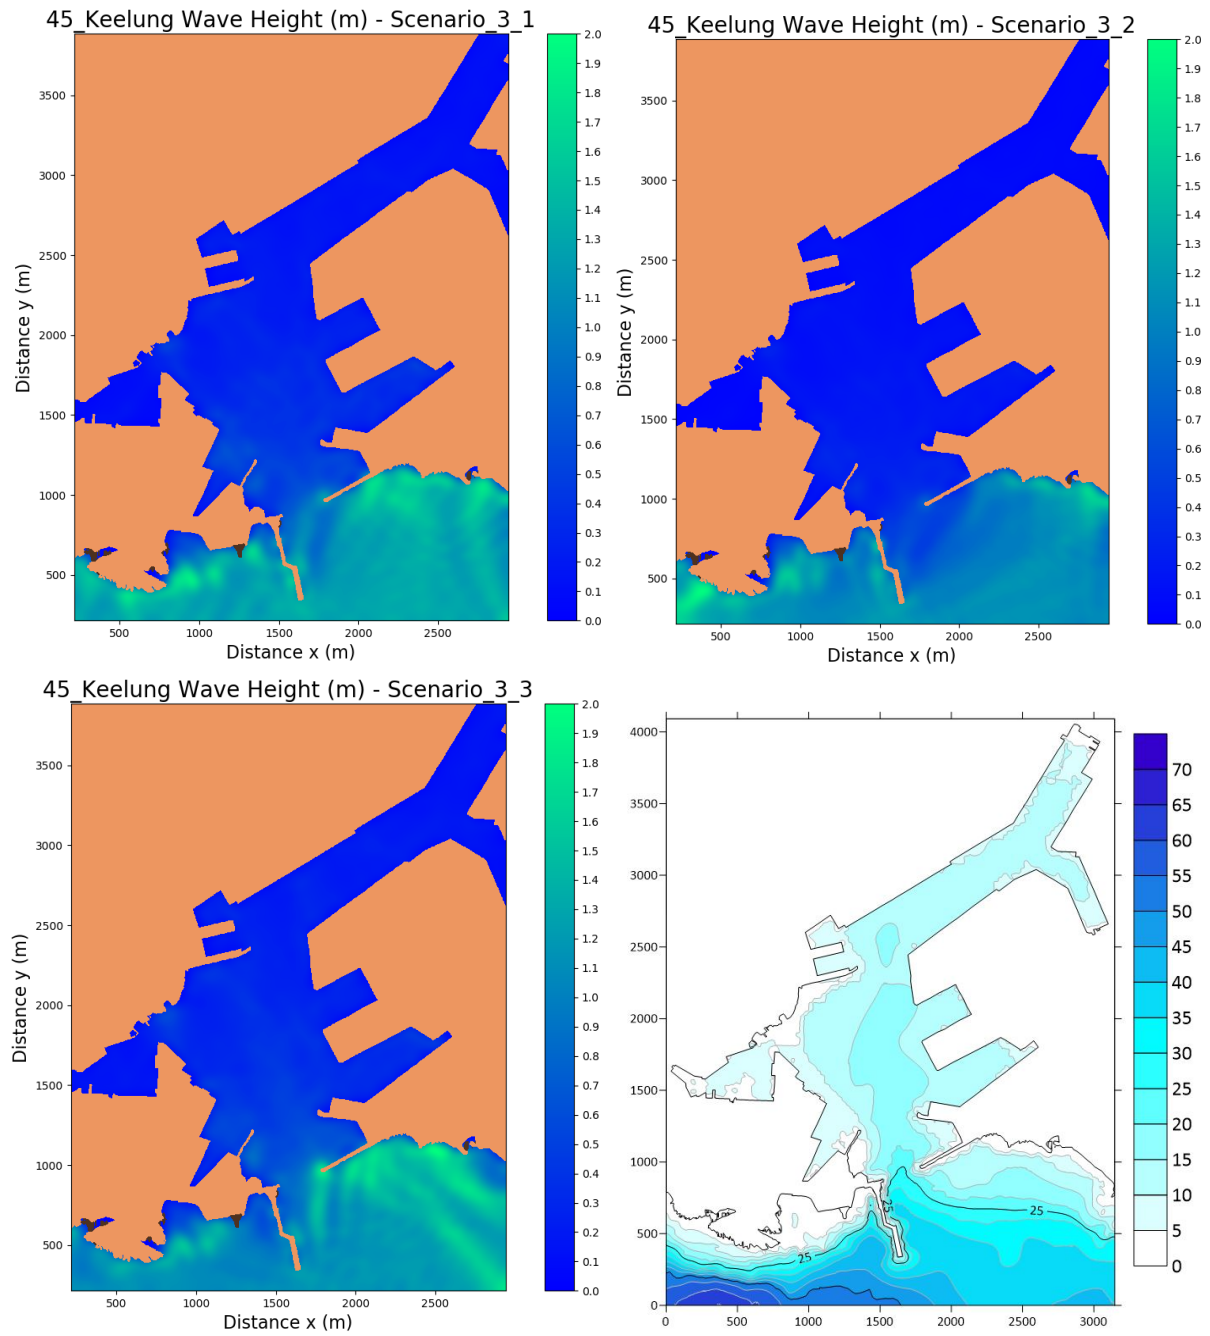

Figure S4.20. Characteristic operational WFS results of  $H_s$  (m) by Model B in **Keelung** (Taiwan; no. 45 of Table 1) port during N, NW, and NE sector incoming swell waves of  $H_s=1\text{m}$  (port orientation is turned 180° clockwise).
